# Supplementary material for: Seco-Tetracenomycins from the Marine-Derived Actinomycete Saccharothrix sp. 10-10
Source: MDPI journal article supplement (doi:10.3390/md16100345), 2018-09-20
Supplement: s1 [file s1]

## Supplementary Information

# Seco-tetracenomycins from the marine-derived actinomycete *Saccharothrix* sp. 10-10

Bin Liu <sup>1,2,†</sup>, Jiao Li <sup>1,†</sup>, Minghua Chen <sup>1</sup>, Xiaomeng Hao <sup>1</sup>, Fei Cao <sup>3</sup>, Yi Tan <sup>1</sup>, Yuhui Ping <sup>2</sup>, Yiguang Wang <sup>1</sup>, Chunling Xiao <sup>1</sup> and Maoluo Gan <sup>1,\*</sup>

<sup>1</sup> Institute of Medicinal Biotechnology, Chinese Academy of Medical Sciences and Peking Union Medical College, Beijing 100050, China; bin0629bin@163.com (B.L.); jiaoli930911@126.com (J.L.); 15210165499@163.com (M.C.); xiaomhao@163.com (X.H.); tanyiyi123@126.com (Y.T.); 13552532543@163.com (Y.W.); xiaocl318@163.com (C.X.)

<sup>2</sup> College of Pharmacy, Jiangxi University of Traditional Chinese Medicine, Nanchang 330004, China; pingyh@163.com

<sup>3</sup> Key Laboratory of Medicinal Chemistry and Molecular Diagnostic of Ministry of Education, College of Pharmacy, Hebei University, Baoding 071002, China; caofei542927001@163.com

\* Correspondence: ganml@imb.pumc.edu.cn; Tel.: +86-10-6316-5277

† These authors contributed equally to this work.

# Supporting Information

## Contents

|                                                                                                                                                                                                                               |     |
|-------------------------------------------------------------------------------------------------------------------------------------------------------------------------------------------------------------------------------|-----|
| <b>Table S1.</b> NMR Spectroscopic Data for <b>1</b> and <b>3–5</b> in DMSO- <i>d</i> <sub>6</sub> .....                                                                                                                      | S4  |
| <b>Table S2.</b> NMR Spectroscopic Data for 13-de- <i>O</i> -methyltetracenomycin X ( <b>6</b> ) and tetracenomycin X ( <b>7</b> ) in CD <sub>3</sub> OD .....                                                                | S5  |
| <b>Table S3.</b> NMR Spectroscopic Data for Saccharothrixones I ( <b>5</b> ), B ( <b>8</b> ), and C ( <b>9</b> ).....                                                                                                         | S6  |
| <b>Figure S1.</b> The experimental ECD and UV spectra of saccharothrixones E–I, B, C ( <b>1–5</b> , <b>8</b> , <b>9</b> ), 13-de- <i>O</i> -methyltetracenomycin X ( <b>6</b> ) and Tcm X ( <b>7</b> ) recorded in MeOH. .... | S7  |
| <b>Scheme 1.</b> Plausible biosynthesis pathway for saccharothrixones A, B ( <b>8</b> ), C ( <b>9</b> ) and E–I ( <b>1–5</b> ).....                                                                                           | S8  |
| <b>Figure S2.</b> The (+)-HRESIMS spectrum of saccharothrixone E ( <b>1</b> ).....                                                                                                                                            | S9  |
| <b>Figure S3.</b> The IR spectrum of saccharothrixone E ( <b>1</b> ). ....                                                                                                                                                    | S10 |
| <b>Figure S4.</b> The <sup>1</sup> H NMR spectrum of saccharothrixone E ( <b>1</b> ) in acetone- <i>d</i> <sub>6</sub> (500 MHz). ....                                                                                        | S11 |
| <b>Figure S5.</b> The <sup>1</sup> H NMR spectrum of saccharothrixone E ( <b>1</b> ) in DMSO- <i>d</i> <sub>6</sub> (600 MHz).....                                                                                            | S12 |
| <b>Figure S6.</b> The <sup>13</sup> C NMR spectrum of saccharothrixone E ( <b>1</b> ) in acetone- <i>d</i> <sub>6</sub> (125 MHz). ....                                                                                       | S13 |
| <b>Figure S7.</b> The HSQC spectrum of saccharothrixone E ( <b>1</b> ) in acetone- <i>d</i> <sub>6</sub> (500 MHz).....                                                                                                       | S14 |
| <b>Figure S8.</b> The HMBC spectrum of saccharothrixone E ( <b>1</b> ) in acetone- <i>d</i> <sub>6</sub> (500 MHz).....                                                                                                       | S15 |
| <b>Figure S9.</b> The ROESY spectrum of saccharothrixone E ( <b>1</b> ) in acetone- <i>d</i> <sub>6</sub> (500 MHz). ....                                                                                                     | S16 |
| <b>Figure S10.</b> The ROESY spectrum of saccharothrixone E ( <b>1</b> ) in DMSO- <i>d</i> <sub>6</sub> (600 MHz). ....                                                                                                       | S17 |
| <b>Figure S11.</b> The (+)-HRESIMS spectrum of saccharothrixone F ( <b>2</b> ). ....                                                                                                                                          | S18 |
| <b>Figure S12.</b> The IR spectrum of saccharothrixone F ( <b>2</b> ).....                                                                                                                                                    | S19 |
| <b>Figure S13.</b> The <sup>1</sup> H NMR spectrum of saccharothrixone F ( <b>2</b> ) in acetone- <i>d</i> <sub>6</sub> (600 MHz). ....                                                                                       | S20 |
| <b>Figure S14.</b> The <sup>13</sup> C NMR spectrum of saccharothrixone F ( <b>2</b> ) in acetone- <i>d</i> <sub>6</sub> (150 MHz). ....                                                                                      | S21 |
| <b>Figure S15.</b> The HSQC spectrum of saccharothrixone F ( <b>2</b> ) in acetone- <i>d</i> <sub>6</sub> (600 MHz). ....                                                                                                     | S22 |
| <b>Figure S16.</b> The HMBC spectrum of saccharothrixone F ( <b>2</b> ) in acetone- <i>d</i> <sub>6</sub> (600 MHz).....                                                                                                      | S23 |
| <b>Figure S17.</b> The (–)-HRESIMS spectrum of saccharothrixone G ( <b>3</b> ). ....                                                                                                                                          | S24 |
| <b>Figure S18.</b> The IR spectrum of saccharothrixone G ( <b>3</b> ). ....                                                                                                                                                   | S25 |
| <b>Figure S19.</b> The <sup>1</sup> H NMR spectrum of saccharothrixone G ( <b>3</b> ) in acetone- <i>d</i> <sub>6</sub> (600 MHz).....                                                                                        | S26 |
| <b>Figure S20.</b> The <sup>1</sup> H NMR spectrum of saccharothrixone G ( <b>3</b> ) in DMSO- <i>d</i> <sub>6</sub> (600 MHz). ....                                                                                          | S27 |
| <b>Figure S21.</b> The <sup>13</sup> C NMR spectrum of saccharothrixone G ( <b>3</b> ) in acetone- <i>d</i> <sub>6</sub> (150 MHz).....                                                                                       | S28 |
| <b>Figure S22.</b> The HSQC spectrum of saccharothrixone G ( <b>3</b> ) in acetone- <i>d</i> <sub>6</sub> (600 MHz). ....                                                                                                     | S29 |
| <b>Figure S23.</b> The HMBC spectrum of saccharothrixone G ( <b>3</b> ) in acetone- <i>d</i> <sub>6</sub> (600 MHz). ....                                                                                                     | S30 |
| <b>Figure S24.</b> The ROESY spectrum of saccharothrixone G ( <b>3</b> ) in acetone- <i>d</i> <sub>6</sub> (600 MHz).....                                                                                                     | S31 |
| <b>Figure S25.</b> The 1D NOE spectrum of saccharothrixone G ( <b>3</b> ) in DMSO- <i>d</i> <sub>6</sub> (600 MHz).....                                                                                                       | S32 |
| <b>Figure S26.</b> The 1D NOE spectrum of saccharothrixone G ( <b>3</b> ) in DMSO- <i>d</i> <sub>6</sub> (600 MHz).....                                                                                                       | S33 |
| <b>Figure S27.</b> The (–)-HRESIMS spectrum of saccharothrixone H ( <b>4</b> ). ....                                                                                                                                          | S34 |
| <b>Figure S28.</b> The IR spectrum of saccharothrixone H ( <b>4</b> ). ....                                                                                                                                                   | S35 |
| <b>Figure S29.</b> The <sup>1</sup> H NMR spectrum of saccharothrixone H ( <b>4</b> ) in acetone- <i>d</i> <sub>6</sub> (600 MHz).....                                                                                        | S36 |
| <b>Figure S30.</b> The <sup>13</sup> C NMR spectrum of saccharothrixone H ( <b>4</b> ) in acetone- <i>d</i> <sub>6</sub> (150 MHz).....                                                                                       | S37 |
| <b>Figure S31.</b> The HSQC spectrum of saccharothrixone H ( <b>4</b> ) in acetone- <i>d</i> <sub>6</sub> (600 MHz). ....                                                                                                     | S38 |
| <b>Figure S32.</b> The HMBC spectrum of saccharothrixone H ( <b>4</b> ) in acetone- <i>d</i> <sub>6</sub> (600 MHz). ....                                                                                                     | S39 |
| <b>Figure S33.</b> The ROESY spectrum of saccharothrixone H ( <b>4</b> ) in acetone- <i>d</i> <sub>6</sub> (600 MHz).....                                                                                                     | S40 |

|                                                                                                                                                                                |     |
|--------------------------------------------------------------------------------------------------------------------------------------------------------------------------------|-----|
| <b>Figure S34.</b> The (–)-HRESIMS spectrum of saccharothrixone I ( <b>5</b> ).....                                                                                            | S41 |
| <b>Figure S35.</b> The IR spectrum of saccharothrixone I ( <b>5</b> ). .....                                                                                                   | S42 |
| <b>Figure S36.</b> The <sup>1</sup> H NMR spectrum of saccharothrixone I ( <b>5</b> ) in acetone- <i>d</i> <sub>6</sub> (500 MHz). .....                                       | S43 |
| <b>Figure S37.</b> The <sup>1</sup> H NMR spectrum of saccharothrixone I ( <b>5</b> ) in DMSO- <i>d</i> <sub>6</sub> (600 MHz).....                                            | S44 |
| <b>Figure S38.</b> The <sup>13</sup> C NMR spectrum of saccharothrixone I ( <b>5</b> ) in acetone- <i>d</i> <sub>6</sub> (125 MHz). .....                                      | S45 |
| <b>Figure S39.</b> The HSQC spectrum of saccharothrixone I ( <b>5</b> ) in acetone- <i>d</i> <sub>6</sub> (500 MHz). .....                                                     | S46 |
| <b>Figure S40.</b> The HMBC spectrum of saccharothrixone I ( <b>5</b> ) in acetone- <i>d</i> <sub>6</sub> (500 MHz). .....                                                     | S47 |
| <b>Figure S41.</b> The ROESY spectrum of saccharothrixone I ( <b>5</b> ) in acetone- <i>d</i> <sub>6</sub> (600 MHz). .....                                                    | S48 |
| <b>Figure S42.</b> The ROESY spectrum of saccharothrixone I ( <b>5</b> ) in DMSO- <i>d</i> <sub>6</sub> (600 MHz). .....                                                       | S49 |
| <b>Figure S43.</b> The (+)-HR ESIMS spectrum of 13-de- <i>O</i> -methyltetracenomycin X ( <b>6</b> ). .....                                                                    | S50 |
| <b>Figure S44.</b> The IR spectrum of 13-de- <i>O</i> -methyltetracenomycin X ( <b>6</b> ).....                                                                                | S51 |
| <b>Figure S45.</b> The <sup>1</sup> H NMR spectrum of 13-de- <i>O</i> -methyltetracenomycin X ( <b>6</b> ) in CD <sub>3</sub> OD.....                                          | S52 |
| <b>Figure S46.</b> The <sup>13</sup> C NMR spectrum of 13-de- <i>O</i> -methyltetracenomycin X ( <b>6</b> ) in CD <sub>3</sub> OD.....                                         | S53 |
| <b>Figure S47.</b> The HSQC spectrum of 13-de- <i>O</i> -methyltetracenomycin X ( <b>6</b> ) in CD <sub>3</sub> OD .....                                                       | S54 |
| <b>Figure S48.</b> The HMBC spectrum of 13-de- <i>O</i> -methyltetracenomycin X ( <b>6</b> ) in CD <sub>3</sub> OD. ....                                                       | S55 |
| <b>Figure S49.</b> Optimized conformers (≥ 1%) of (4 <i>S</i> ,4 <i>aR</i> ,5 <i>S</i> ,12 <i>aR</i> )- <b>1a</b> at the B3LYP/6-311+G(d,p) level with PCM model in MeOH.....  | S56 |
| <b>Figure S50.</b> Optimized conformers (≥ 1%) of (4 <i>S</i> ,4 <i>aR</i> ,5 <i>S</i> ,12 <i>aR</i> )- <b>2a</b> at the B3LYP/6-311+G(d,p) level with PCM model in MeOH.....  | S56 |
| <b>Figure S51.</b> Optimized conformers (≥ 1%) of (4 <i>S</i> ,4 <i>aR</i> ,5 <i>S</i> ,12 <i>aS</i> )- <b>3a</b> at the B3LYP/6-311+G(d,p) level with PCM model in MeOH.....  | S56 |
| <b>Figure S52.</b> Optimized conformers (≥ 1%) of (4 <i>R</i> ,4 <i>aR</i> ,5 <i>S</i> ,12 <i>aS</i> )- <b>3c</b> at the B3LYP/6-311+G(d,p) level with PCM model in MeOH.....  | S56 |
| <b>Figure S53.</b> Optimized conformers (≥ 1%) of (4 <i>S</i> ,4 <i>aR</i> ,5 <i>R</i> ,12 <i>aR</i> )- <b>5a</b> at the B3LYP/6-311+G (d,p) level with PCM model in MeOH..... | S57 |

**Table S1.** NMR Spectroscopic Data for **1** and **3–5** in DMSO-*d*<sub>6</sub><sup>a</sup>

| no                   | <b>1</b> (DMSO- <i>d</i> <sub>6</sub> )       | <b>3</b> (DMSO- <i>d</i> <sub>6</sub> ) |                                               | <b>4</b> (DMSO- <i>d</i> <sub>6</sub> ) |                                               | <b>5</b> (DMSO- <i>d</i> <sub>6</sub> ) |                                               |
|----------------------|-----------------------------------------------|-----------------------------------------|-----------------------------------------------|-----------------------------------------|-----------------------------------------------|-----------------------------------------|-----------------------------------------------|
| No.                  | $\delta_{\text{H}}$ , mult. ( <i>J</i> in Hz) | $\delta_{\text{C}}$                     | $\delta_{\text{H}}$ , mult. ( <i>J</i> in Hz) | $\delta_{\text{C}}$                     | $\delta_{\text{H}}$ , mult. ( <i>J</i> in Hz) | $\delta_{\text{C}}$                     | $\delta_{\text{H}}$ , mult. ( <i>J</i> in Hz) |
| 1                    |                                               | 171.9                                   |                                               | 172.0                                   |                                               | 194.8                                   |                                               |
| 2                    | 5.62, s                                       | 88.6                                    | 5.38, d (1.2)                                 | 88.3                                    | 5.42, s                                       | 99.1                                    | 5.29, d (1.2)                                 |
| 3                    |                                               | 183.4                                   |                                               | 181.3                                   |                                               | 173.2                                   |                                               |
| 4                    | 4.54, d (3.0)                                 | 77.0                                    | 5.16, d (1.2)                                 | 79.1                                    | 6.10, s                                       | 67.6                                    | 4.54, d (7.8)                                 |
| 4a                   |                                               | 81.3                                    |                                               | 77.7                                    |                                               | 80.0                                    |                                               |
| 5                    | 4.58, d (3.0)                                 | 67.6                                    | 4.85, d (10.2)                                | 66.5                                    | 5.18, d (9.6)                                 | 79.1                                    | 5.81, d (1.2)                                 |
| 5a                   |                                               | 140.6                                   |                                               | 141.0                                   |                                               | 143.1                                   |                                               |
| 6                    | 7.41, s                                       | 116.7                                   | 7.42, s                                       | 116.6                                   | 7.42, s                                       | 113.8                                   | 7.52, d (1.2)                                 |
| 6a                   |                                               | 140.6                                   |                                               | 141.0                                   |                                               | 141.2                                   |                                               |
| 7                    | 7.31, s                                       | 105.1                                   | 7.26, s                                       | 105.4                                   | 7.30, s                                       | 105.4                                   | 7.25, s                                       |
| 8                    |                                               | 156.2                                   |                                               | 156.5                                   |                                               | 155.0                                   |                                               |
| 9                    |                                               | 126.0                                   |                                               | 125.9                                   |                                               | 125.9                                   |                                               |
| 10                   |                                               | 135.9                                   |                                               | 136.0                                   |                                               | 134.8                                   |                                               |
| 10a                  |                                               | 116.4                                   |                                               | 116.4                                   |                                               | 117.3                                   |                                               |
| 11                   |                                               | 163.9                                   |                                               | 164.0                                   |                                               | 156.9                                   |                                               |
| 11a                  |                                               | 108.6                                   |                                               | 107.8                                   |                                               | 105.6                                   |                                               |
| 12                   |                                               | 202.8                                   |                                               | 203.0                                   |                                               | 170.9                                   |                                               |
| 12a                  |                                               | 83.7                                    | 4.42, s                                       | 81.6                                    | 3.56, s                                       | 83.6                                    | 3.82, s                                       |
| 13                   |                                               | 167.8                                   |                                               | 167.7                                   |                                               | 167.9                                   |                                               |
| 14                   | 2.73, s                                       | 20.5                                    | 2.72, s                                       | 20.6                                    | 2.72, s                                       | 20.4                                    | 2.73, s                                       |
| 3-OCH <sub>3</sub>   | 3.83, s                                       | 59.7                                    | 3.84, s                                       | 59.8                                    | 3.87, s                                       | 56.4                                    | 3.64, s                                       |
| 8-OCH <sub>3</sub>   | 3.89, s                                       | 56.1                                    | 3.90, s                                       | 56.2                                    | 3.91, s                                       | 55.9                                    | 3.88, s                                       |
| 12a-OCH <sub>3</sub> | 3.60, s                                       | 60.6                                    | 3.63, s                                       | 58.4                                    | 3.25, s                                       | 59.7                                    | 3.36, s                                       |
| 13-OCH <sub>3</sub>  | 3.86, s                                       | 52.4                                    | 3.86, s                                       | 52.4                                    | 3.86, s                                       | 52.4                                    | 3.86, s                                       |
| 4-OH                 | 5.47, d (3.0)                                 |                                         |                                               |                                         |                                               |                                         | 5.37, d (7.8)                                 |
| 4a-OH                | 5.23, s                                       |                                         | 5.26, s                                       |                                         | 5.31, s                                       |                                         | 5.74, s                                       |
| 5-OH                 | 6.07, brs                                     |                                         | 5.81, d (10.2)                                |                                         | 5.86, d (9.6)                                 |                                         |                                               |
| 11-OH                | 14.70, brs                                    |                                         | 14.48, brs                                    |                                         | n.o.                                          |                                         |                                               |

<sup>a</sup> <sup>1</sup>H NMR and <sup>13</sup>C NMR data were recorded at 600 and 150 MHz, respectively. The assignments were based on HSQC and HMBC experiments. n.o.: not observed.

**Table S2.** NMR Spectroscopic Data for 13-de-*O*-methyltetracenomycin X (**6**) and tetracenomycin X (**7**) in CD<sub>3</sub>OD <sup>a</sup>

| No.                  | 6 (CD <sub>3</sub> OD) |                | 7 (CD <sub>3</sub> OD) |                |
|----------------------|------------------------|----------------|------------------------|----------------|
|                      | $\delta_C$ , type      | $\delta_H$ , m | $\delta_C$             | $\delta_H$ , m |
| 1                    | 193.9, C               |                | 188.3                  |                |
| 2                    | 101.9, CH              | 5.53, d (1.8)  | 101.4                  | 5.32, brs      |
| 3                    | 174.8, C               |                | 178.8                  |                |
| 4                    | 70.9, CH               | 4.85, brs      | 70.2                   | 4.88, brs      |
| 4a                   | 86.1, C                |                | 84.8                   |                |
| 5                    | 194.4, C               |                | 195.4                  |                |
| 5a                   | 141.9, C               |                | 141.4                  |                |
| 6                    | 121.8, CH              | 8.01, s        | 115.8                  | 7.42, s        |
| 6a                   | 128.7, C               |                | 127.2                  |                |
| 7                    | 108.7, CH              | 7.46, s        | 108.0                  | 7.20, s        |
| 8                    | 159.3, C               |                | 157.8                  |                |
| 9                    | 132.8, C               |                | 130.6                  |                |
| 10                   | 138.0, C               |                | 140.2                  |                |
| 10a                  | 121.9, C               |                | 127.2                  |                |
| 11                   | 167.5, C               |                | 170.1                  |                |
| 11a                  | 110.5, C               |                | 112.1                  |                |
| 12                   | 197.6, C               |                | 195.6                  |                |
| 12a                  | 89.0, C                |                | 88.9                   |                |
| 13                   | 171.8, C               |                | 173.5                  |                |
| 14                   | 21.1, CH <sub>3</sub>  | 2.88, s        | 20.5                   | 2.63, s        |
| 3-OCH <sub>3</sub>   | 57.5, CH <sub>3</sub>  | 3.80, s        | 56.4                   | 3.85, s        |
| 8-OCH <sub>3</sub>   | 56.7, CH <sub>3</sub>  | 4.01, s        | 55.7                   | 3.91, s        |
| 12a-OCH <sub>3</sub> | 56.7, CH <sub>3</sub>  | 3.56, s        | 55.6                   | 3.48, s        |
| 13-OCH <sub>3</sub>  |                        |                | 52.2                   | 3.58, s        |

**Table S3.** NMR Spectroscopic Data for Saccharothrixones I (**5**), B (**8**), and C (**9**) <sup>a</sup>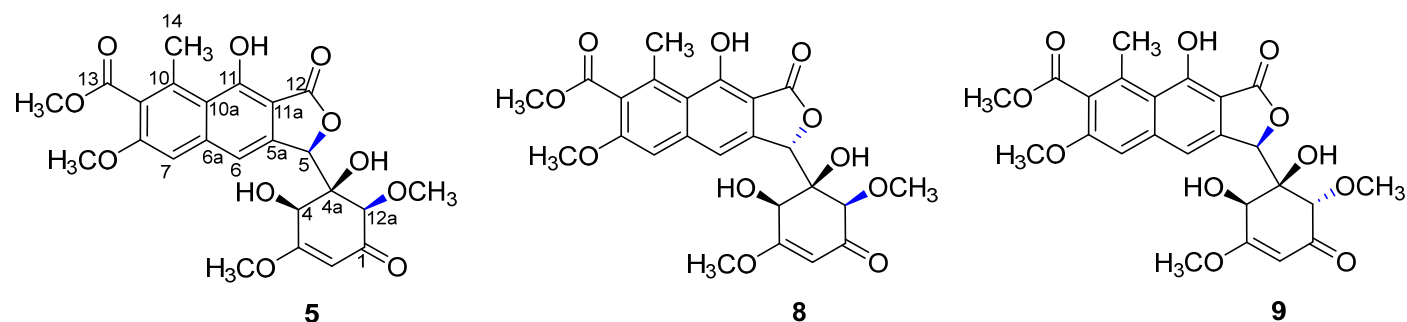

| No.                  | 5 (acetone- <i>d</i> <sub>6</sub> ) |                | 8 (acetone- <i>d</i> <sub>6</sub> ) <sup>b</sup> |                | 9 (acetone- <i>d</i> <sub>6</sub> ) <sup>b</sup> |                |
|----------------------|-------------------------------------|----------------|--------------------------------------------------|----------------|--------------------------------------------------|----------------|
|                      | $\delta_C$ , type                   | $\delta_H$ , m | $\delta_C$ , type                                | $\delta_H$ , m | $\delta_C$ , type                                | $\delta_H$ , m |
| 1                    | 194.9, C                            |                | 196.0, C                                         |                | 193.6, C                                         |                |
| 2                    | 100.3, CH                           | 5.32, d (1.0)  | 100.7, CH                                        | 5.26, s        | 100.6, CH                                        | 5.30, s        |
| 3                    | 173.1, C                            |                | 174.4, C                                         |                | 174.0, C                                         |                |
| 4                    | 68.3, CH                            | 4.65, d (1.0)  | 72.2, CH                                         | 3.88, s        | 69.0, CH                                         | 4.62, s        |
| 4a                   | 80.3, C                             |                | 77.1, C                                          |                | 78.4, C                                          |                |
| 5                    | 81.0, CH                            | 5.98, s        | 83.1, CH                                         | 5.81, s        | 84.7, CH                                         | 5.92, s        |
| 5a                   | 143.0, C                            |                | 142.1, C                                         |                | 142.4, C                                         |                |
| 6                    | 115.0, CH                           | 7.61, s        | 114.3, CH                                        | 7.57, s        | 115.1, CH                                        | 7.61, s        |
| 6a                   | 143.3, C                            |                | 142.8, C                                         |                | 143.1, C                                         |                |
| 7                    | 106.2, CH                           | 7.27, s        | 106.3, CH                                        | 7.37, s        | 106.3, CH                                        | 7.32, s        |
| 8                    | 156.9, C                            |                | 156.8, C                                         |                | 157.0, C                                         |                |
| 9                    | 127.7, C                            |                | 127.7, C                                         |                | 127.9, C                                         |                |
| 10                   | 136.1, C                            |                | 136.0, C                                         |                | 136.2, C                                         |                |
| 10a                  | 118.0, C                            |                | 117.7, C                                         |                | 118.0, C                                         |                |
| 11                   | 158.5, C                            |                | 158.2, C                                         |                | 158.6, C                                         |                |
| 11a                  | 106.2, C                            |                | 107.7, C                                         |                | 105.9, C                                         |                |
| 12                   | 173.4, C                            |                | 173.7, C                                         |                | 173.3, C                                         |                |
| 12a                  | 84.1, CH                            | 3.93, s        | 81.6, CH                                         | 4.42, s        | 83.8, CH                                         | 3.84, s        |
| 13                   | 168.6, C                            |                | 168.7, C                                         |                | 168.5, C                                         |                |
| 14                   | 20.4, CH <sub>3</sub>               | 2.81, s        | 20.4, CH <sub>3</sub>                            | 2.82, s        | 20.4, CH <sub>3</sub>                            | 2.81, s        |
| 3-OCH <sub>3</sub>   | 56.8, CH <sub>3</sub>               | 3.72, s        | 56.7, CH <sub>3</sub>                            | 3.65, s        | 56.9, CH <sub>3</sub>                            | 3.75, s        |
| 8-OCH <sub>3</sub>   | 56.3, CH <sub>3</sub>               | 3.93, s        | 56.4, CH <sub>3</sub>                            | 3.97, s        | 56.4, CH <sub>3</sub>                            | 3.97, s        |
| 12a-OCH <sub>3</sub> | 60.6, CH <sub>3</sub>               | 3.51, s        | 61.1, CH <sub>3</sub>                            | 3.73, s        | 59.4, CH <sub>3</sub>                            | 3.28, s        |
| 13-OCH <sub>3</sub>  | 52.5, CH <sub>3</sub>               | 3.90, s        | 52.5, CH <sub>3</sub>                            | 3.91, s        | 52.5, CH <sub>3</sub>                            | 3.91, s        |

<sup>a</sup> <sup>1</sup>H NMR data were measured for **5**, **8** and **9** at 500, 800, and 600 MHz, respectively. <sup>13</sup>C NMR data were measured for **5**, **8** and **9** at 125, 200, and 1500 MHz. The assignments were based on HSQC and HMBC experiments. <sup>b</sup> The NMR data were reported in our previous work: Gan, M. et al. *J. Nat. Prod.* 2015, 78, 2260-2265.

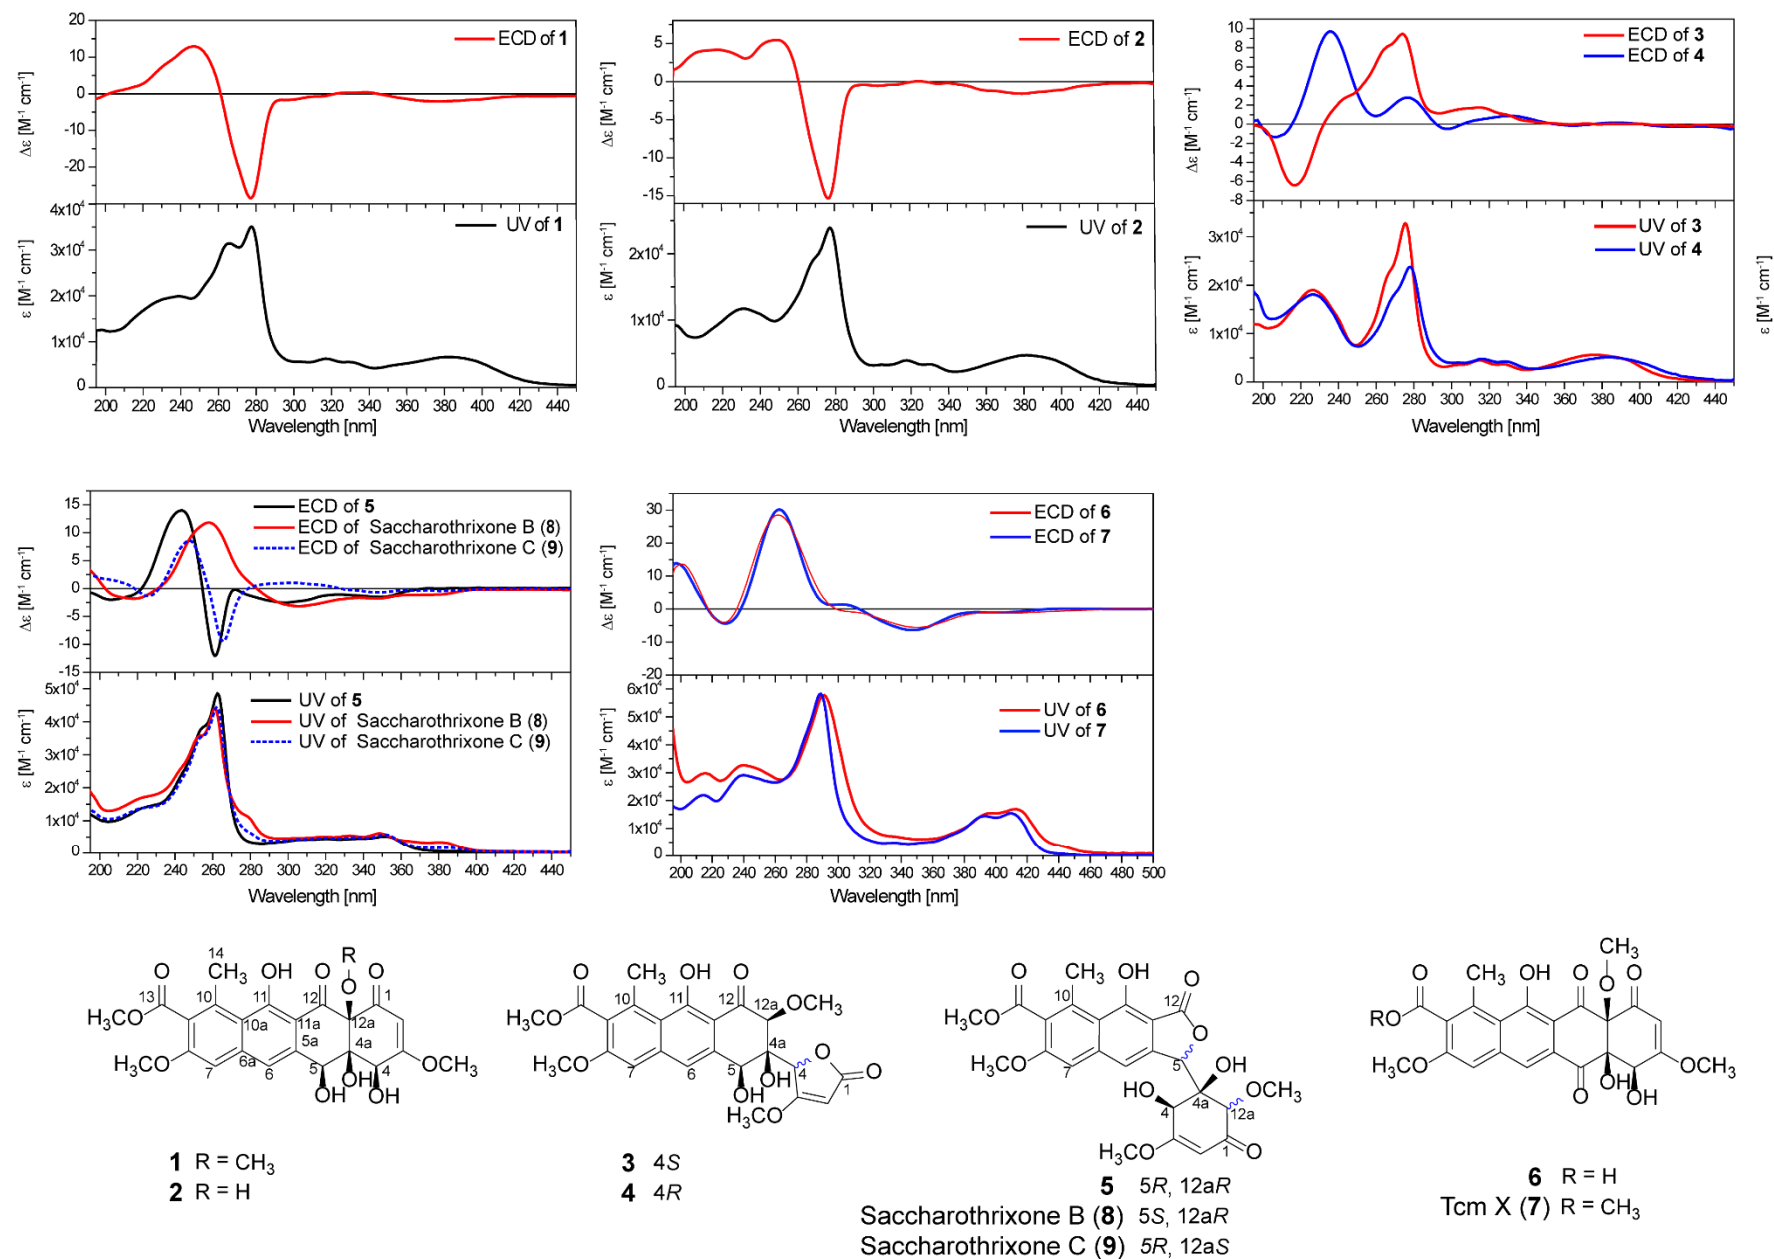

**Figure S1.** The experimental ECD and UV spectra of saccharothrixones E–I, B, C (**1–5**, **8**, **9**), 13-de-*O*-methyltetracenomycin X (**6**) and Tcm X (**7**) recorded in MeOH.

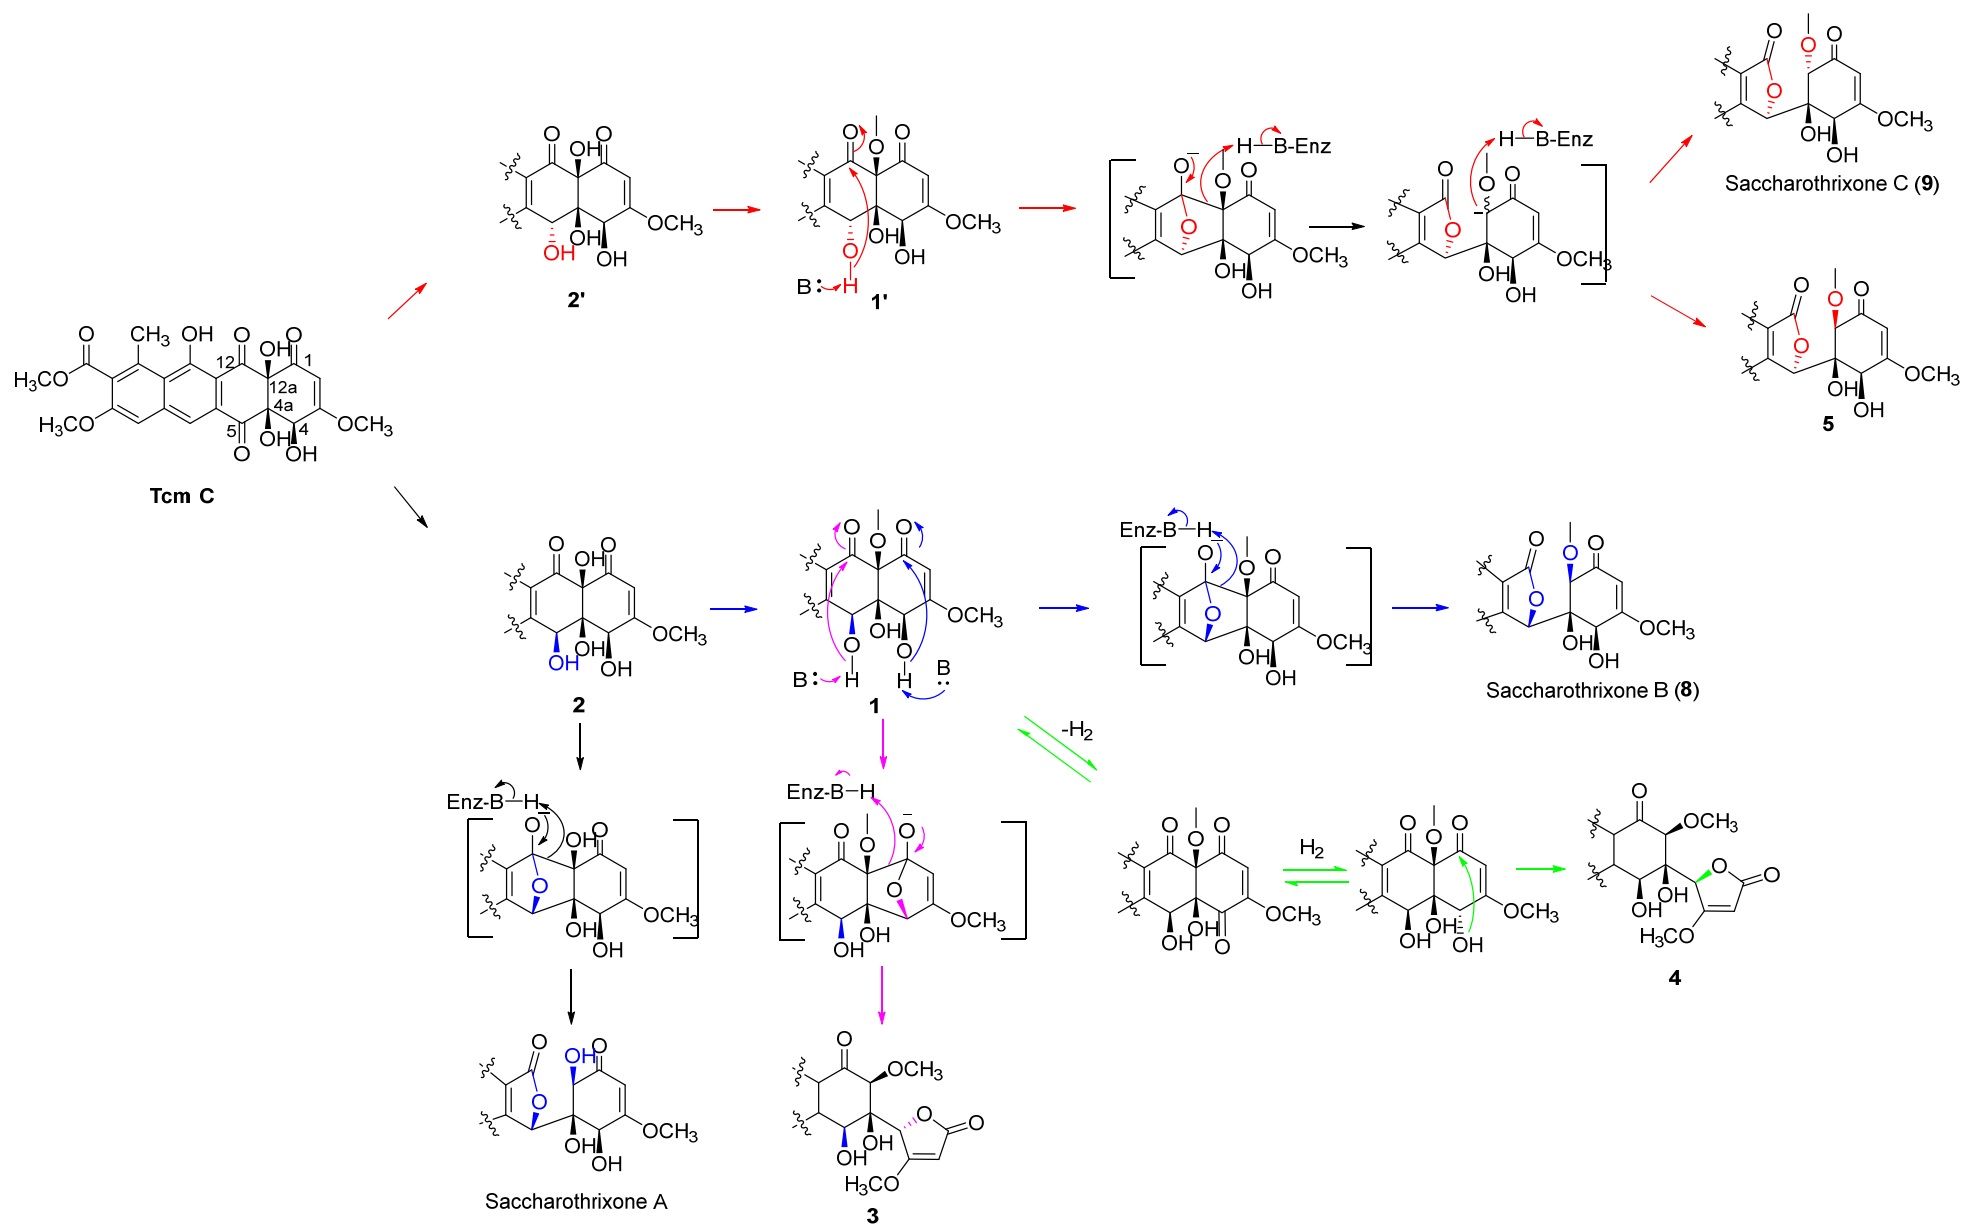

**Scheme 1.** Plausible biosynthesis pathway for saccharothrixones A, B (**8**), C (**9**) and E-I (**1–5**).



marine-20-6-HRESI #59 RT: 0.87 AV: 1 NL: 1.44E6  
T: FTMS + c ESI Full ms [100.00-1000.00]

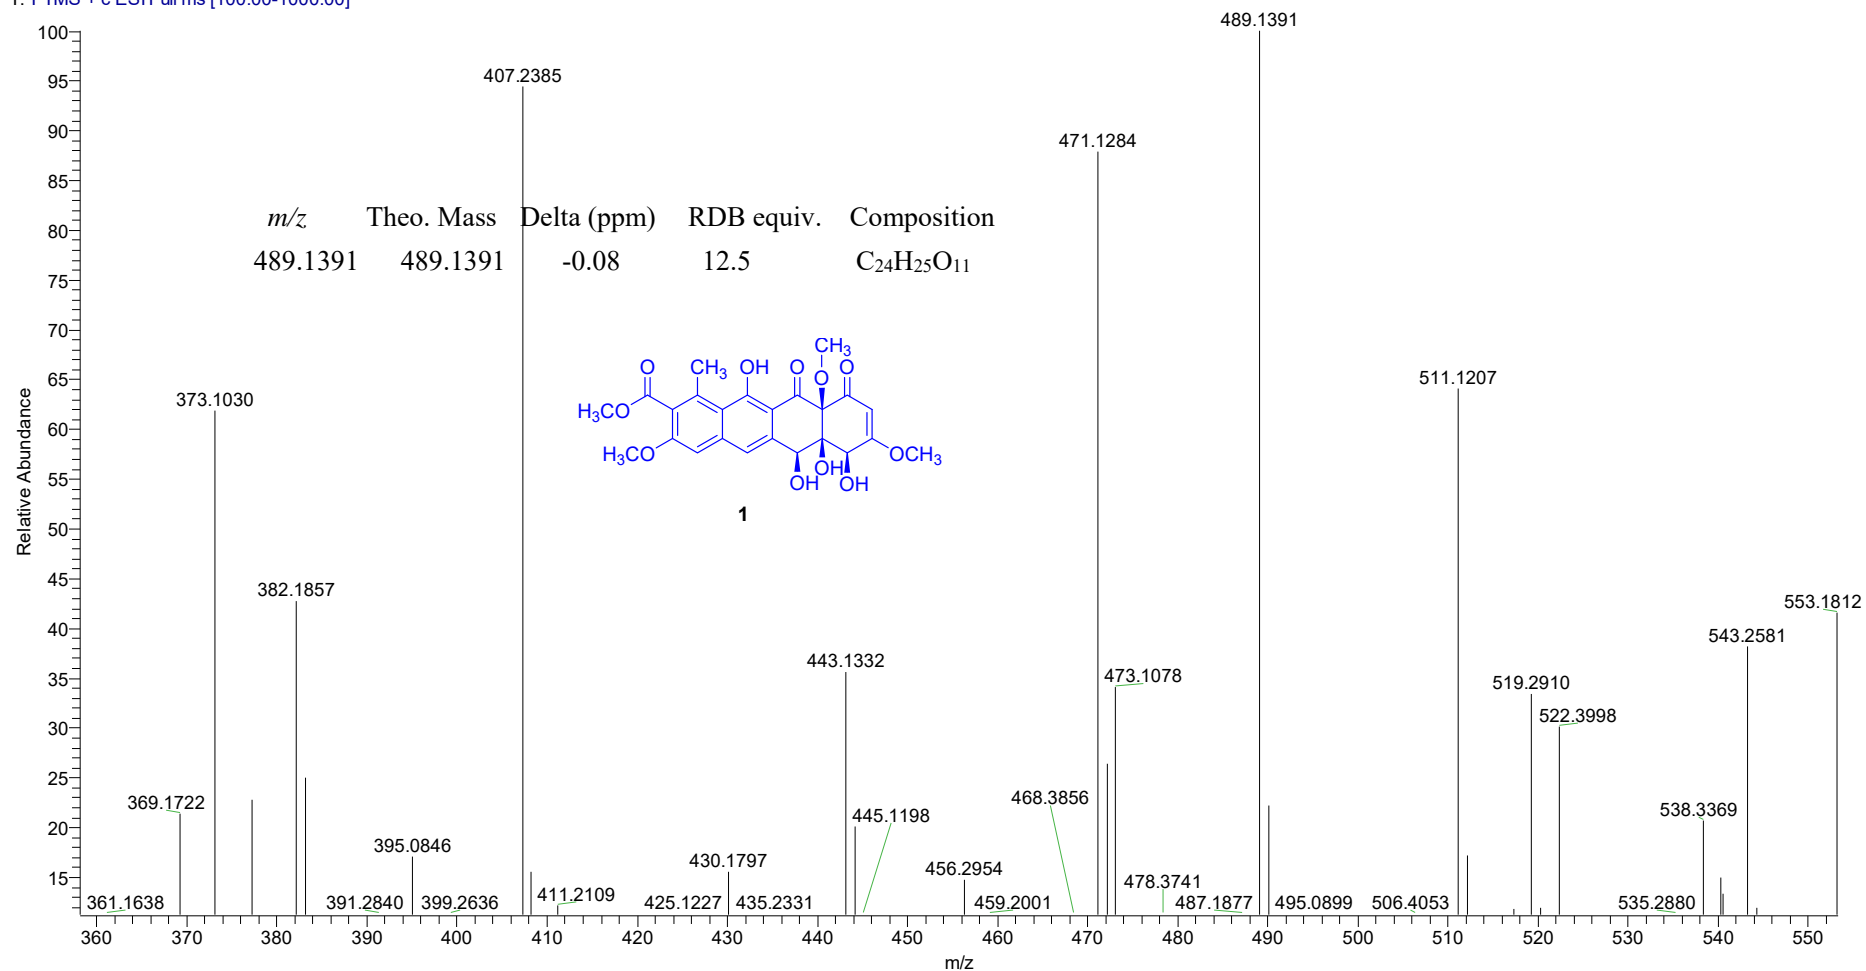

**Figure S2.** The (+)-HRESIMS spectrum of saccharothrixone E (**1**).

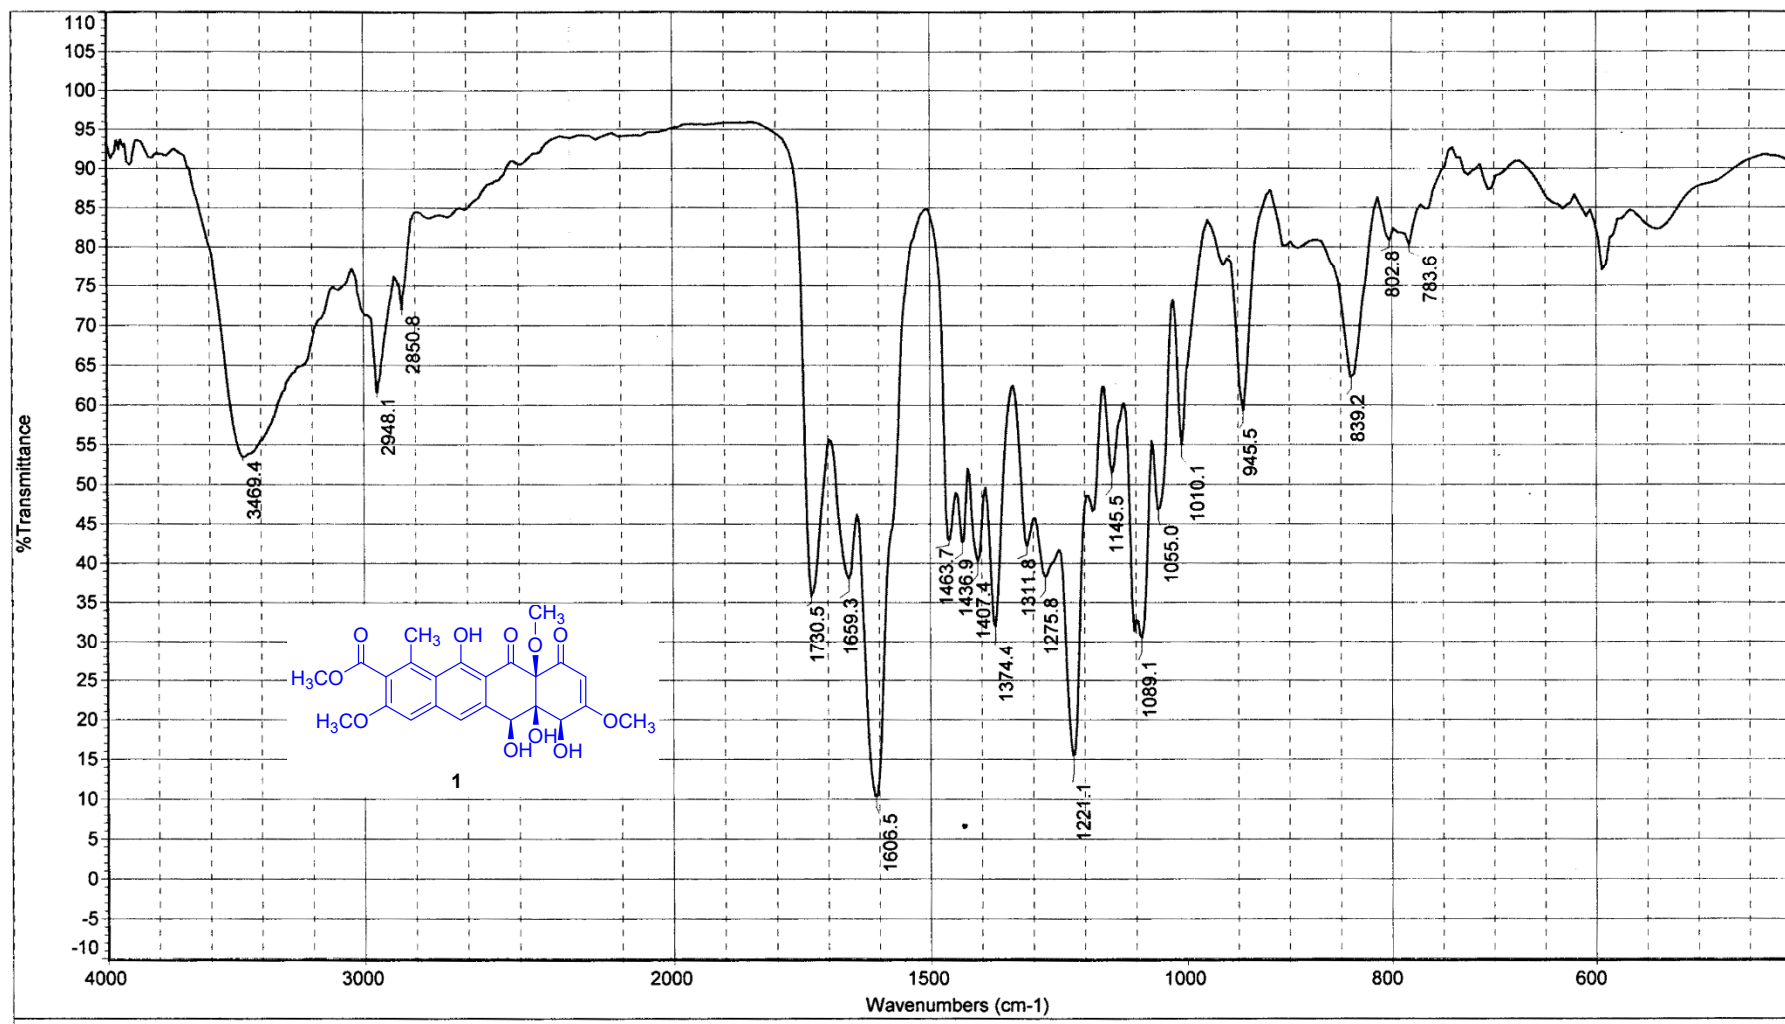

**Figure S3.** The IR spectrum of saccharothrixone E (**1**).

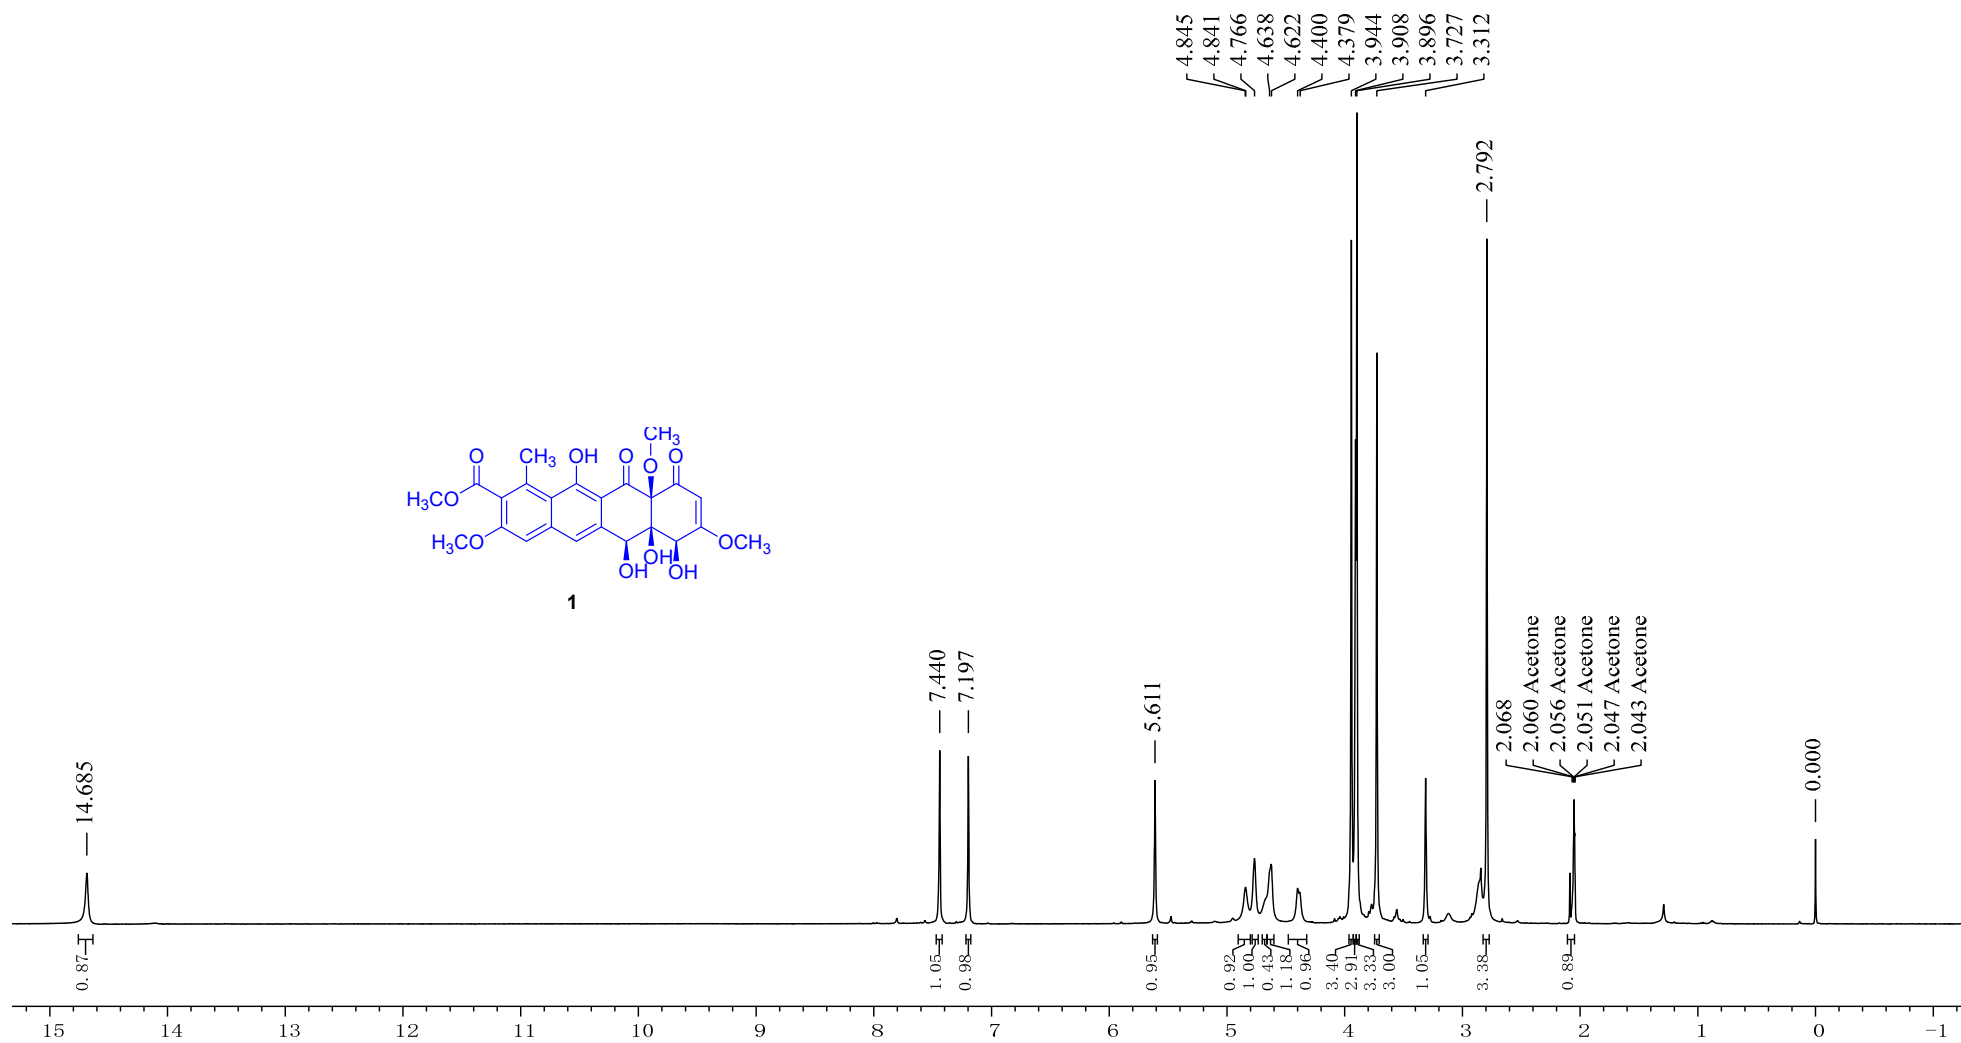

**Figure S4.** The <sup>1</sup>H NMR spectrum of saccharothrixone E (**1**) in acetone-*d*<sub>6</sub> (500 MHz).

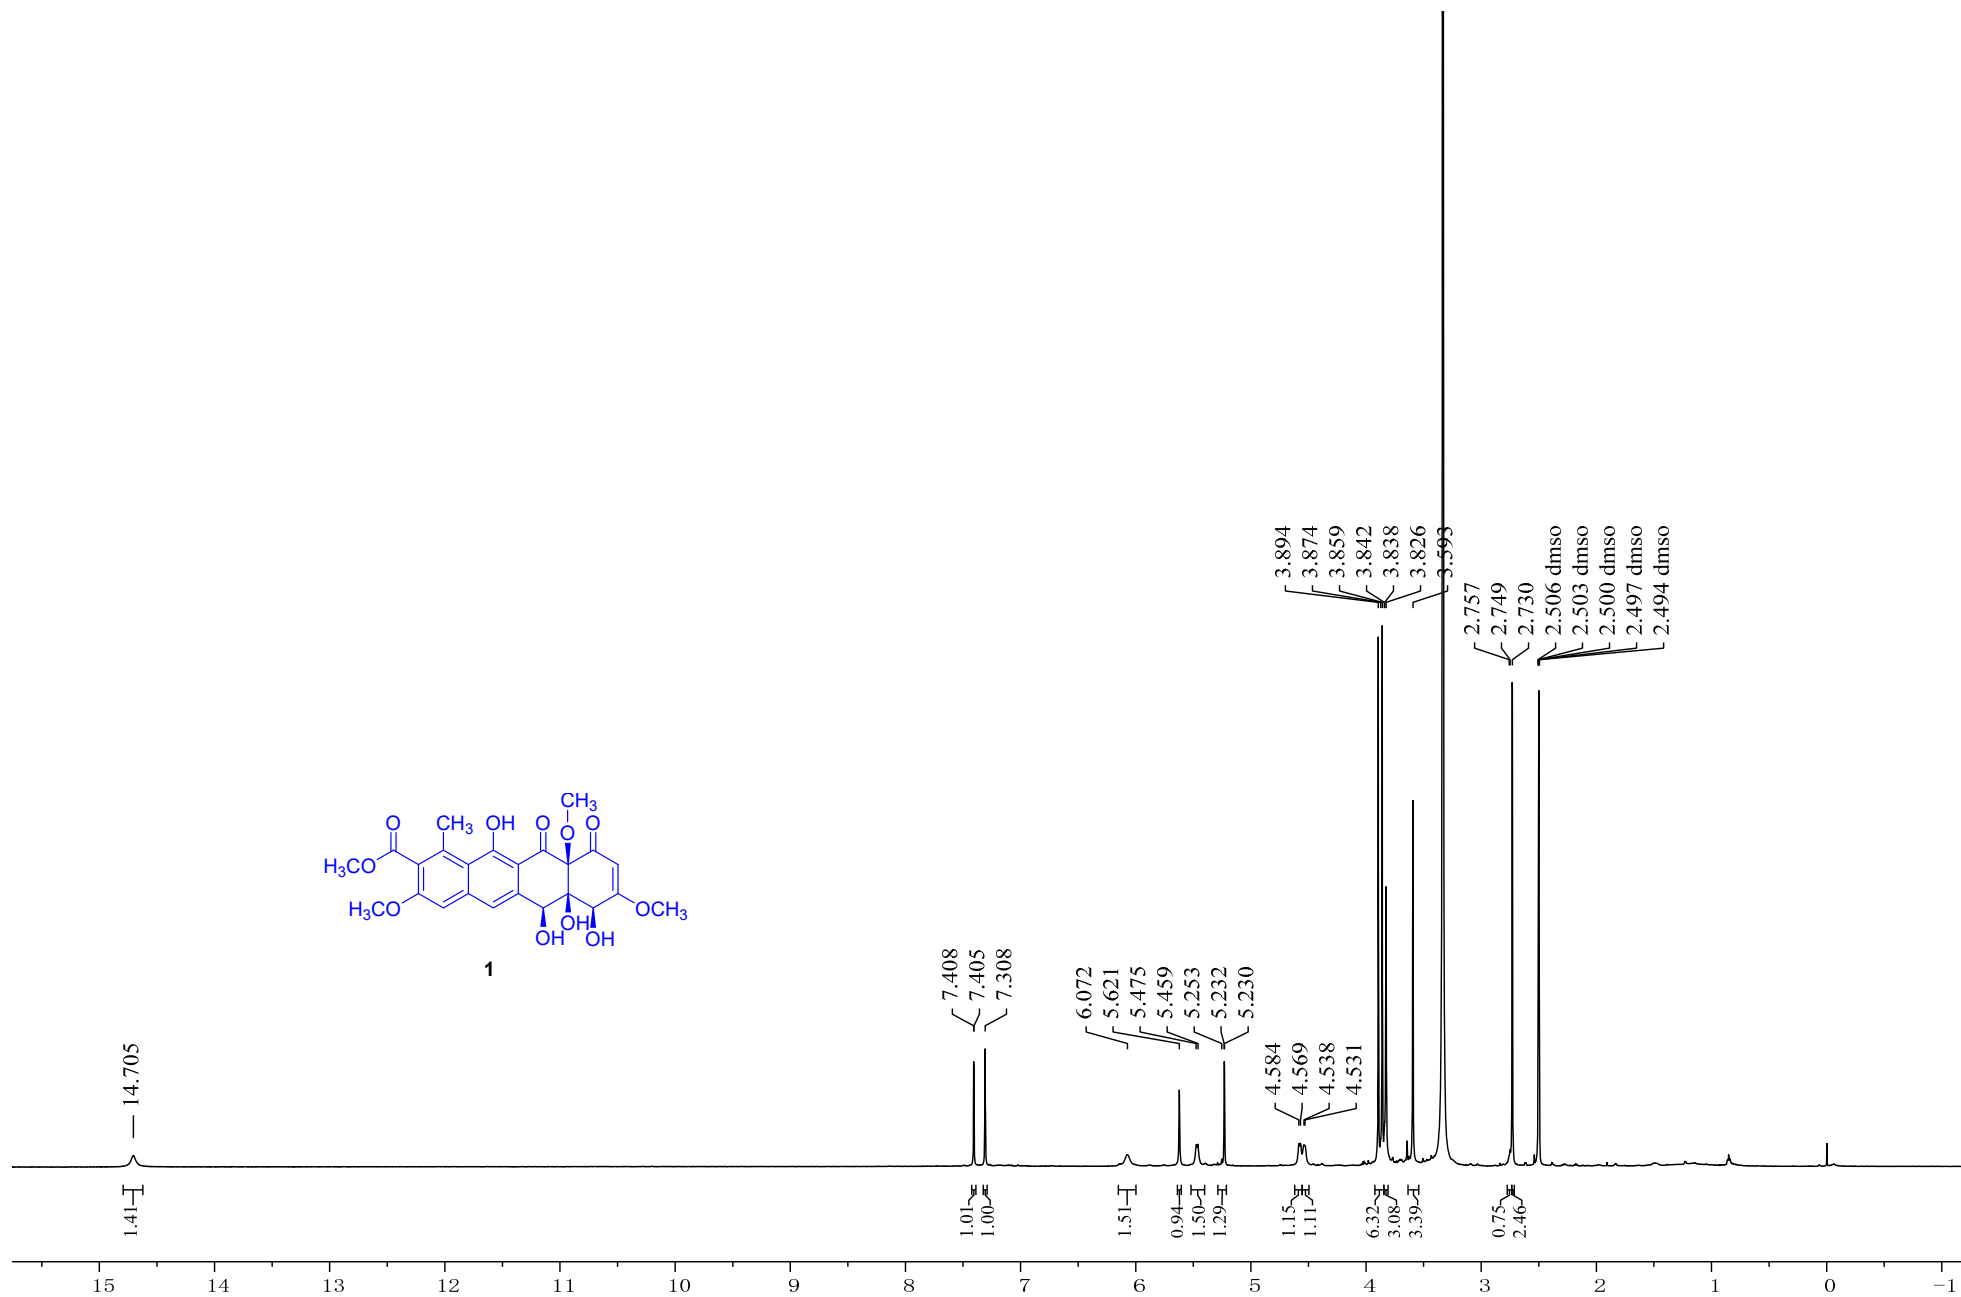

**Figure S5.** The <sup>1</sup>H NMR spectrum of saccharothrixone E (**1**) in DMSO-*d*<sub>6</sub> (600 MHz).

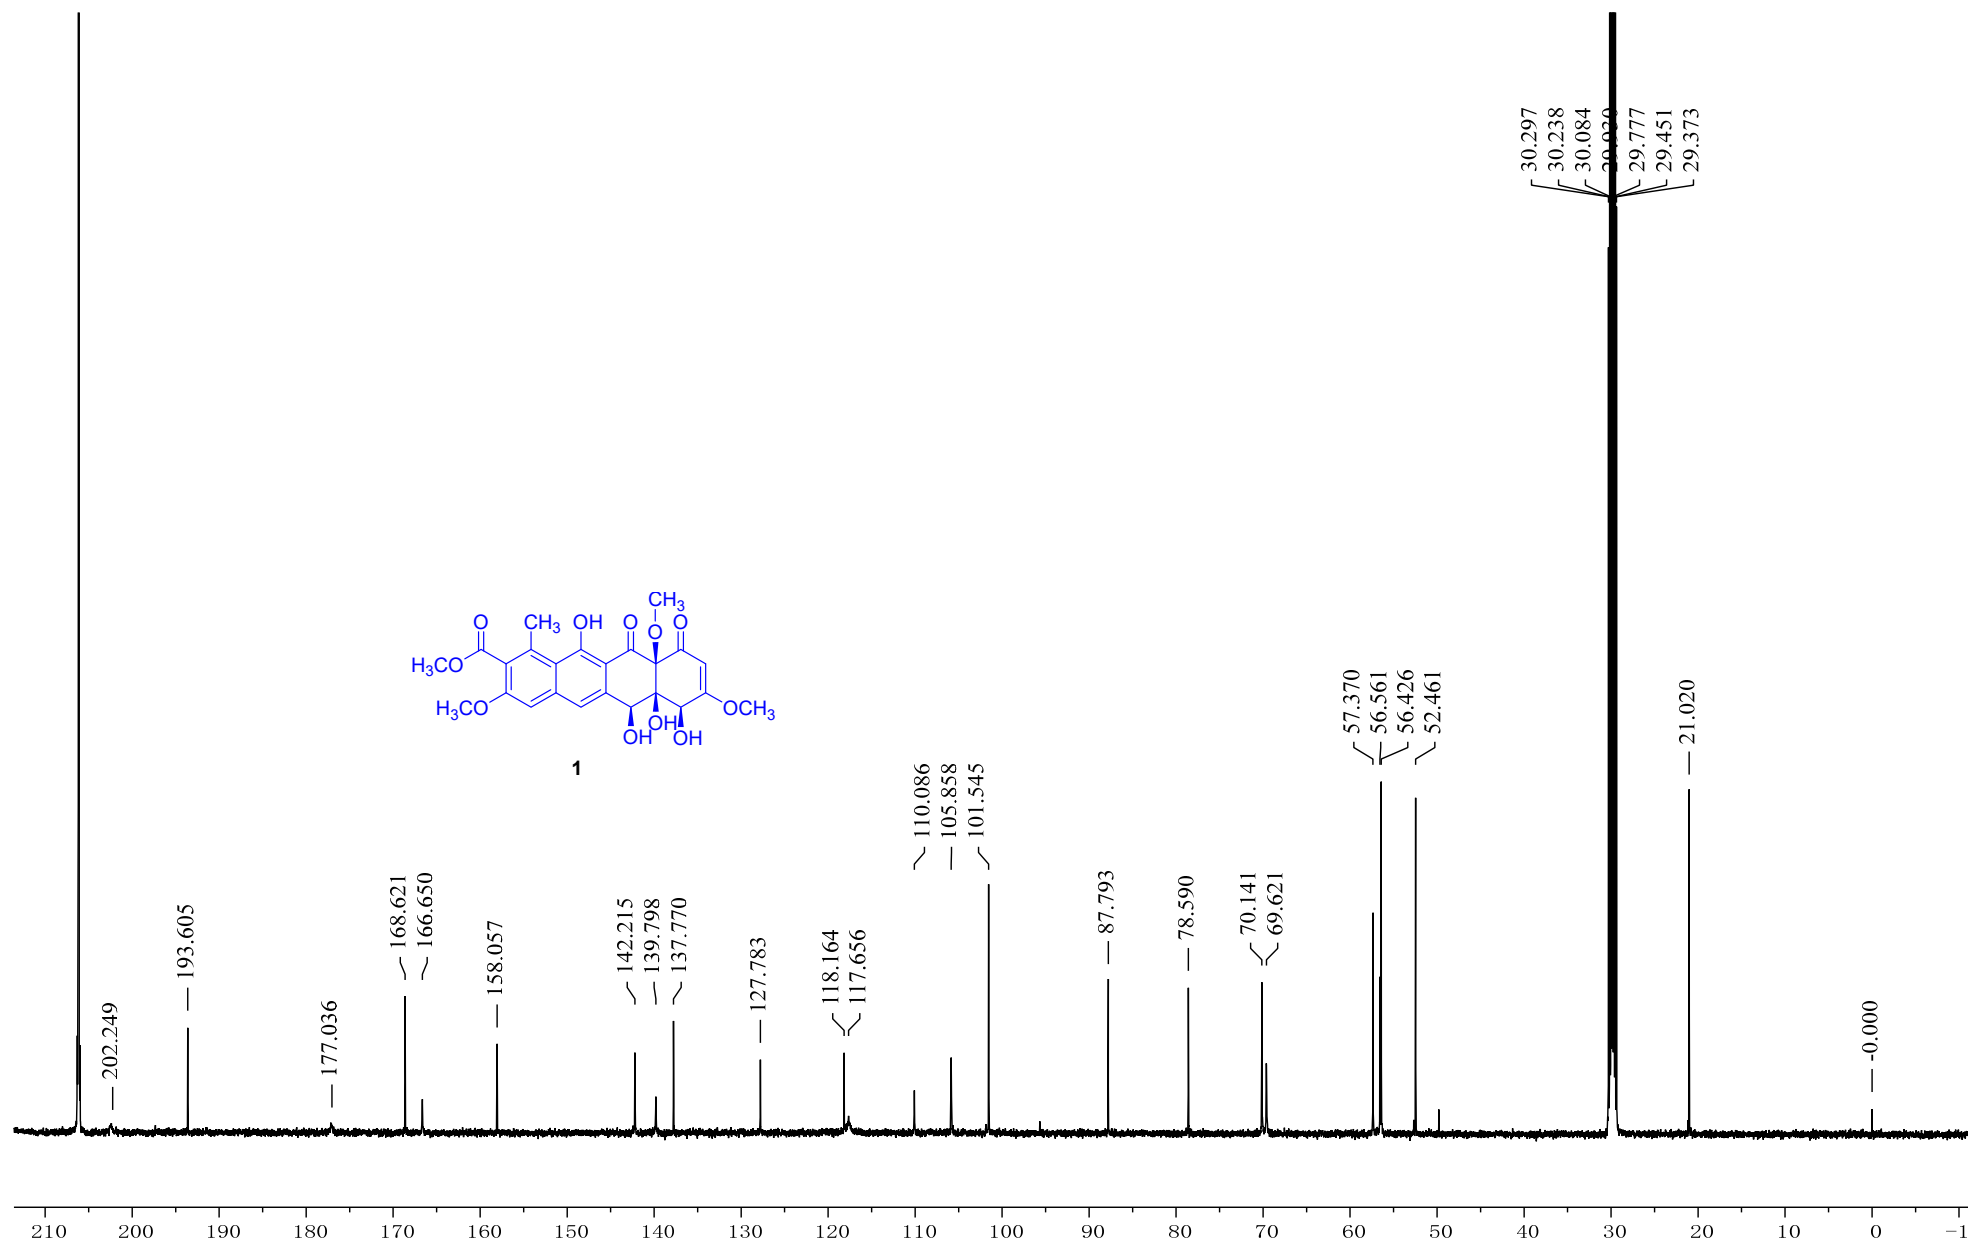

**Figure S6.** The  $^{13}\text{C}$  NMR spectrum of saccharothrixone E (**1**) in acetone- $d_6$  (125 MHz).

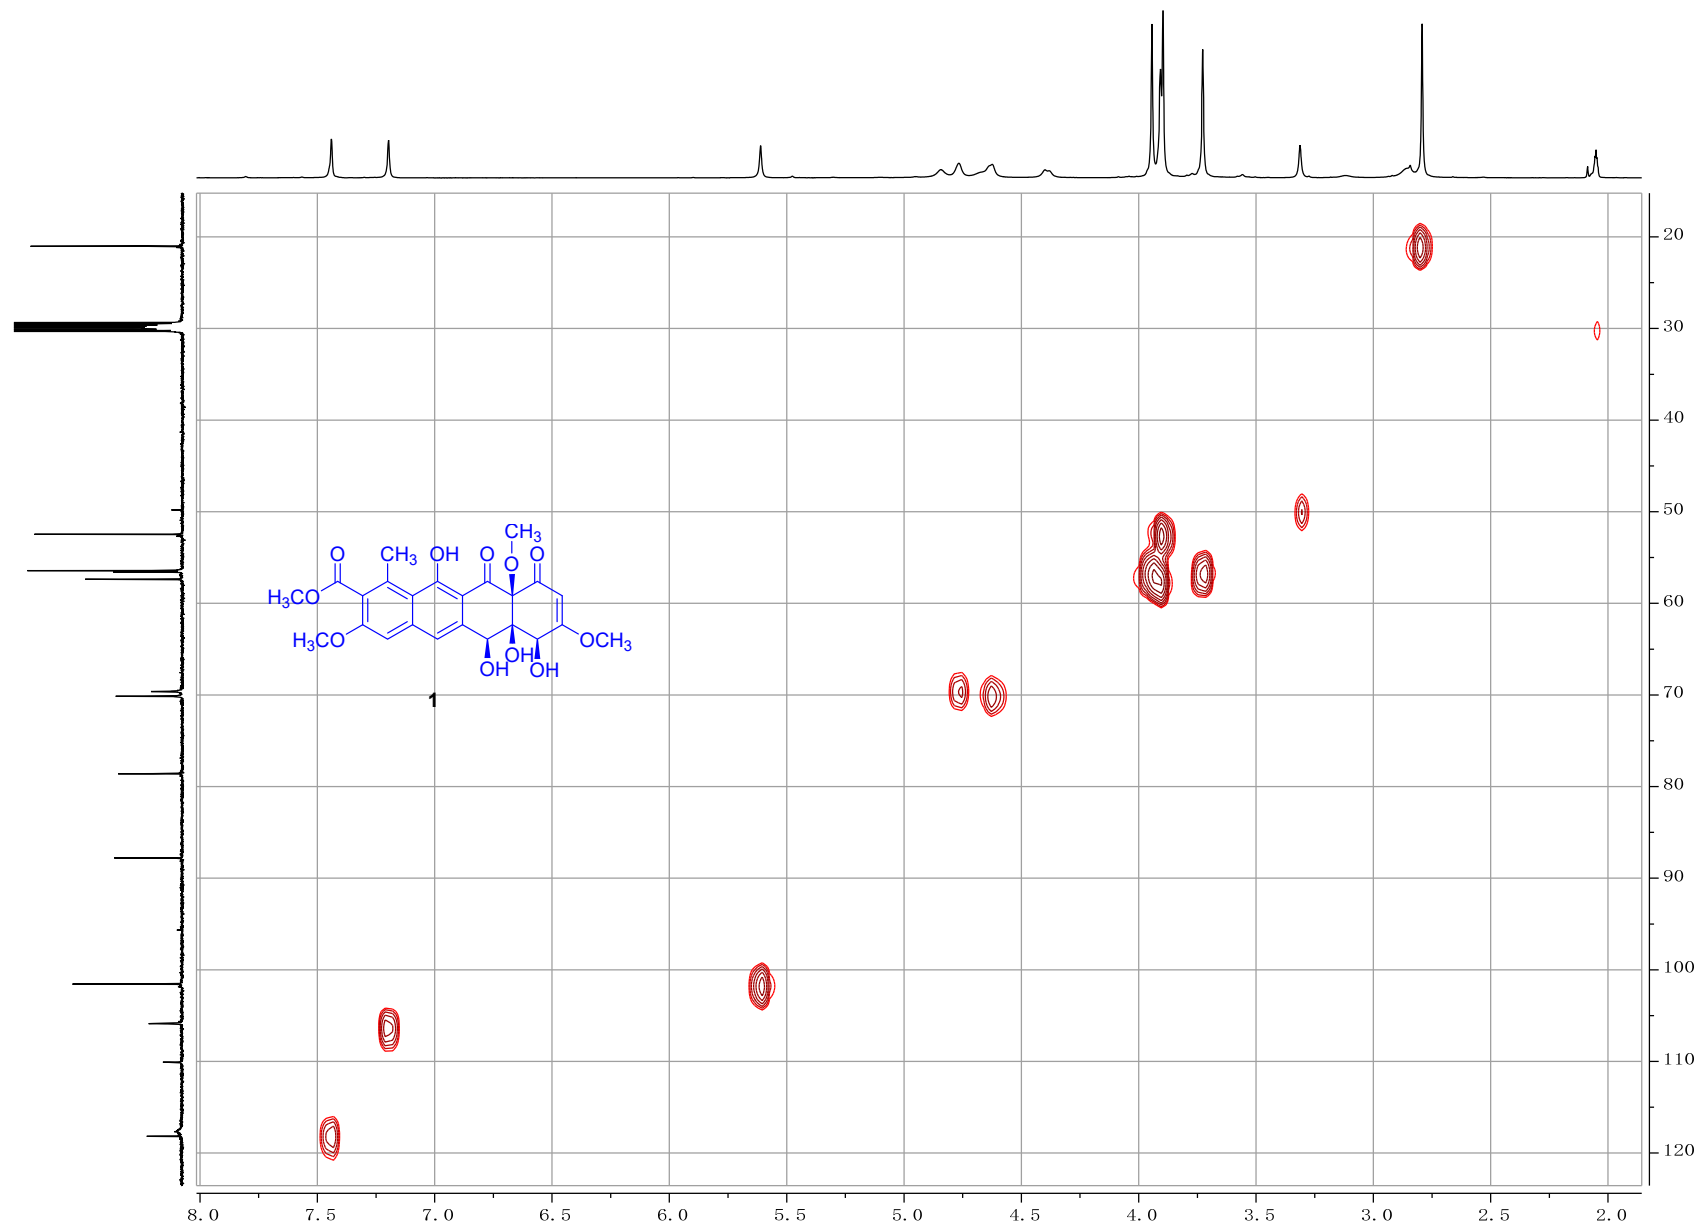

**Figure S7.** The HSQC spectrum of saccharothrixone E (**1**) in acetone-*d*<sub>6</sub> (500 MHz).

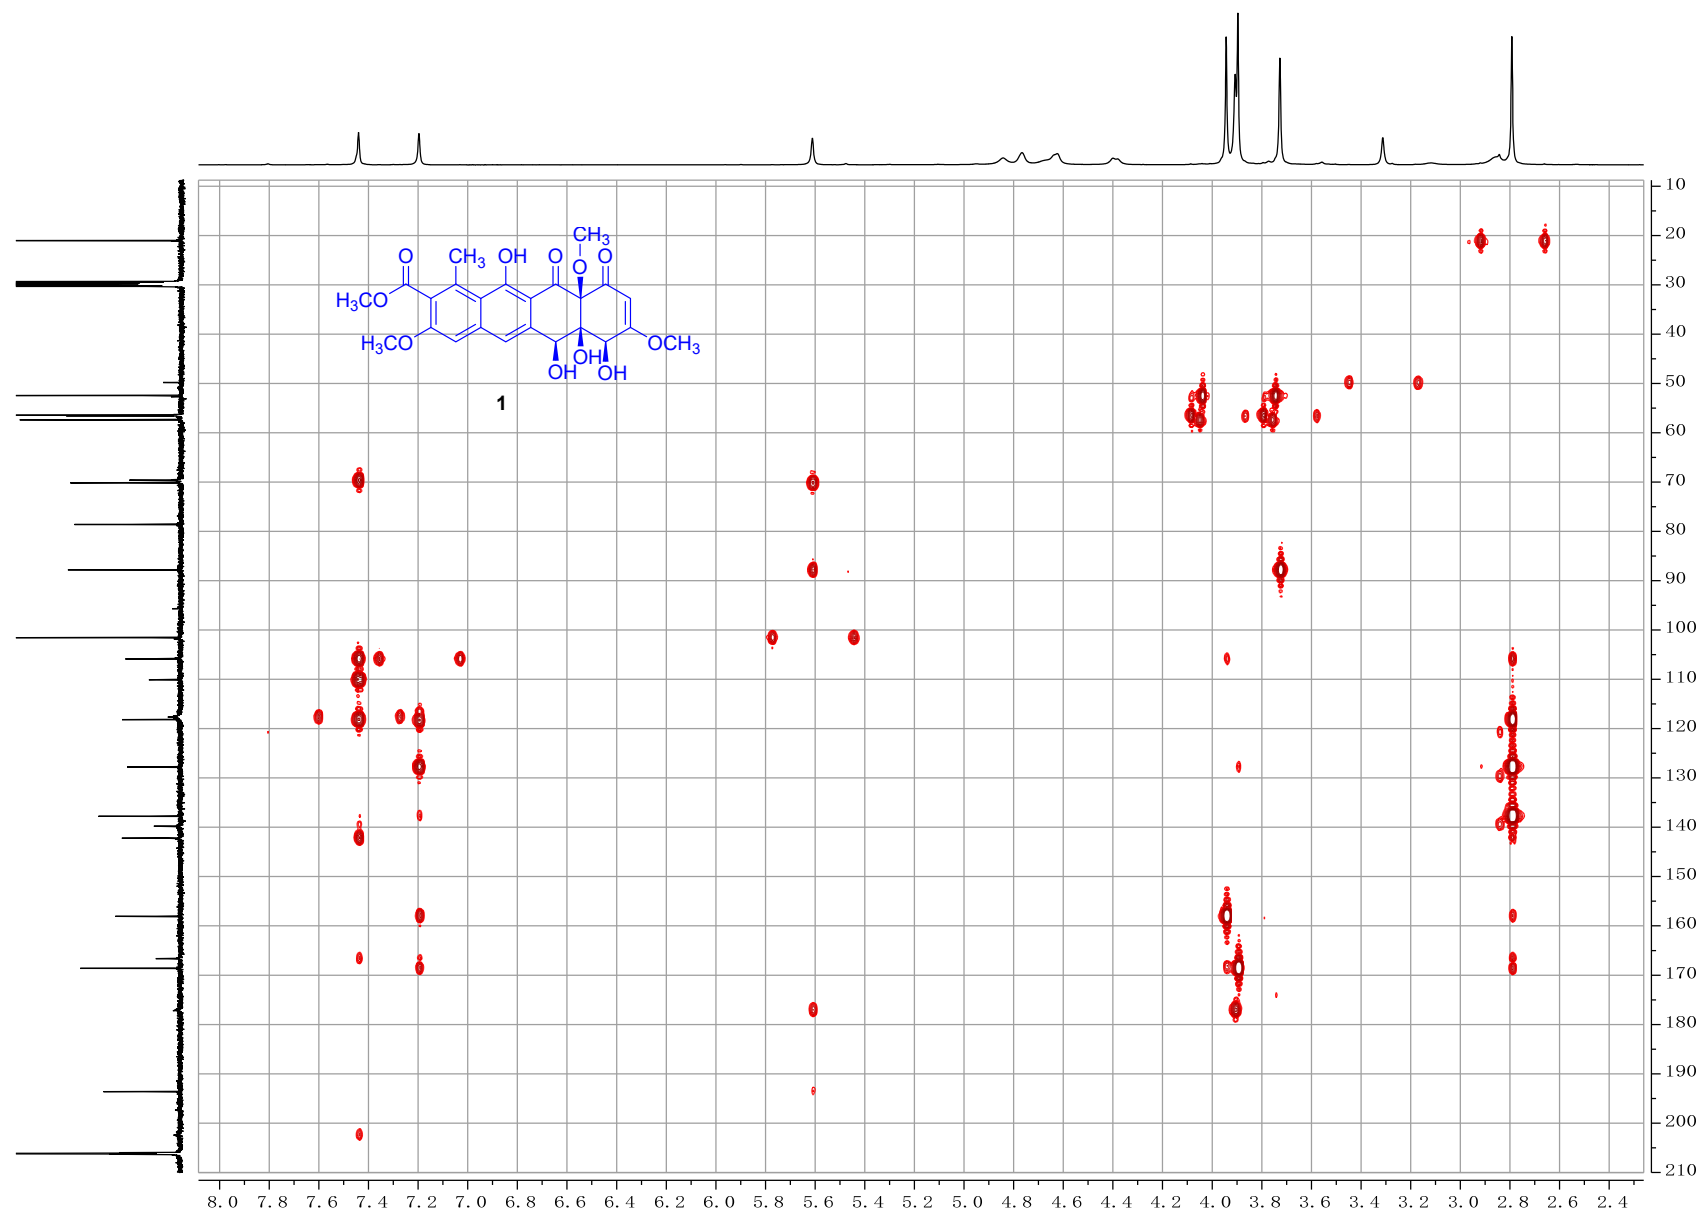

**Figure S8.** The HMBC spectrum of saccharothrixone E (**1**) in acetone- $d_6$  (500 MHz).

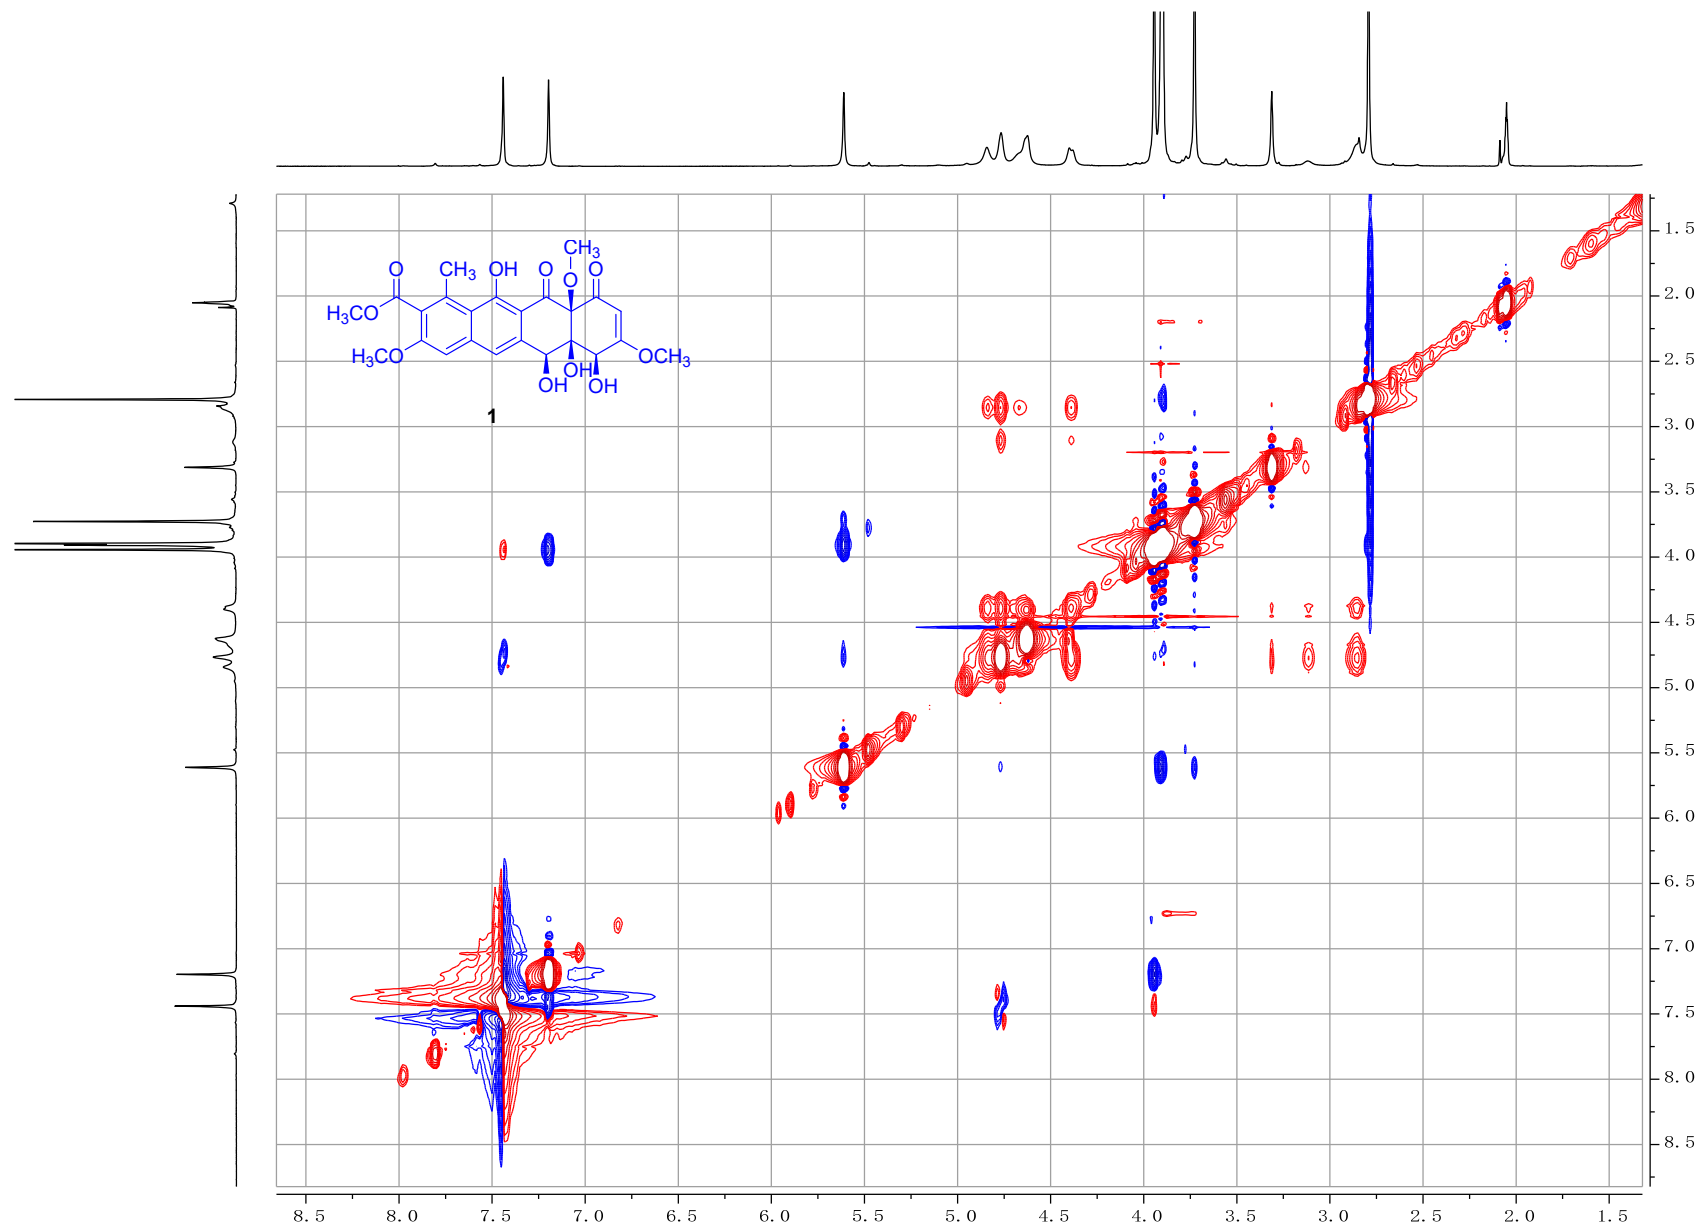

**Figure S9.** The ROESY spectrum of saccharothrixone E (**1**) in acetone- $d_6$  (500 MHz).



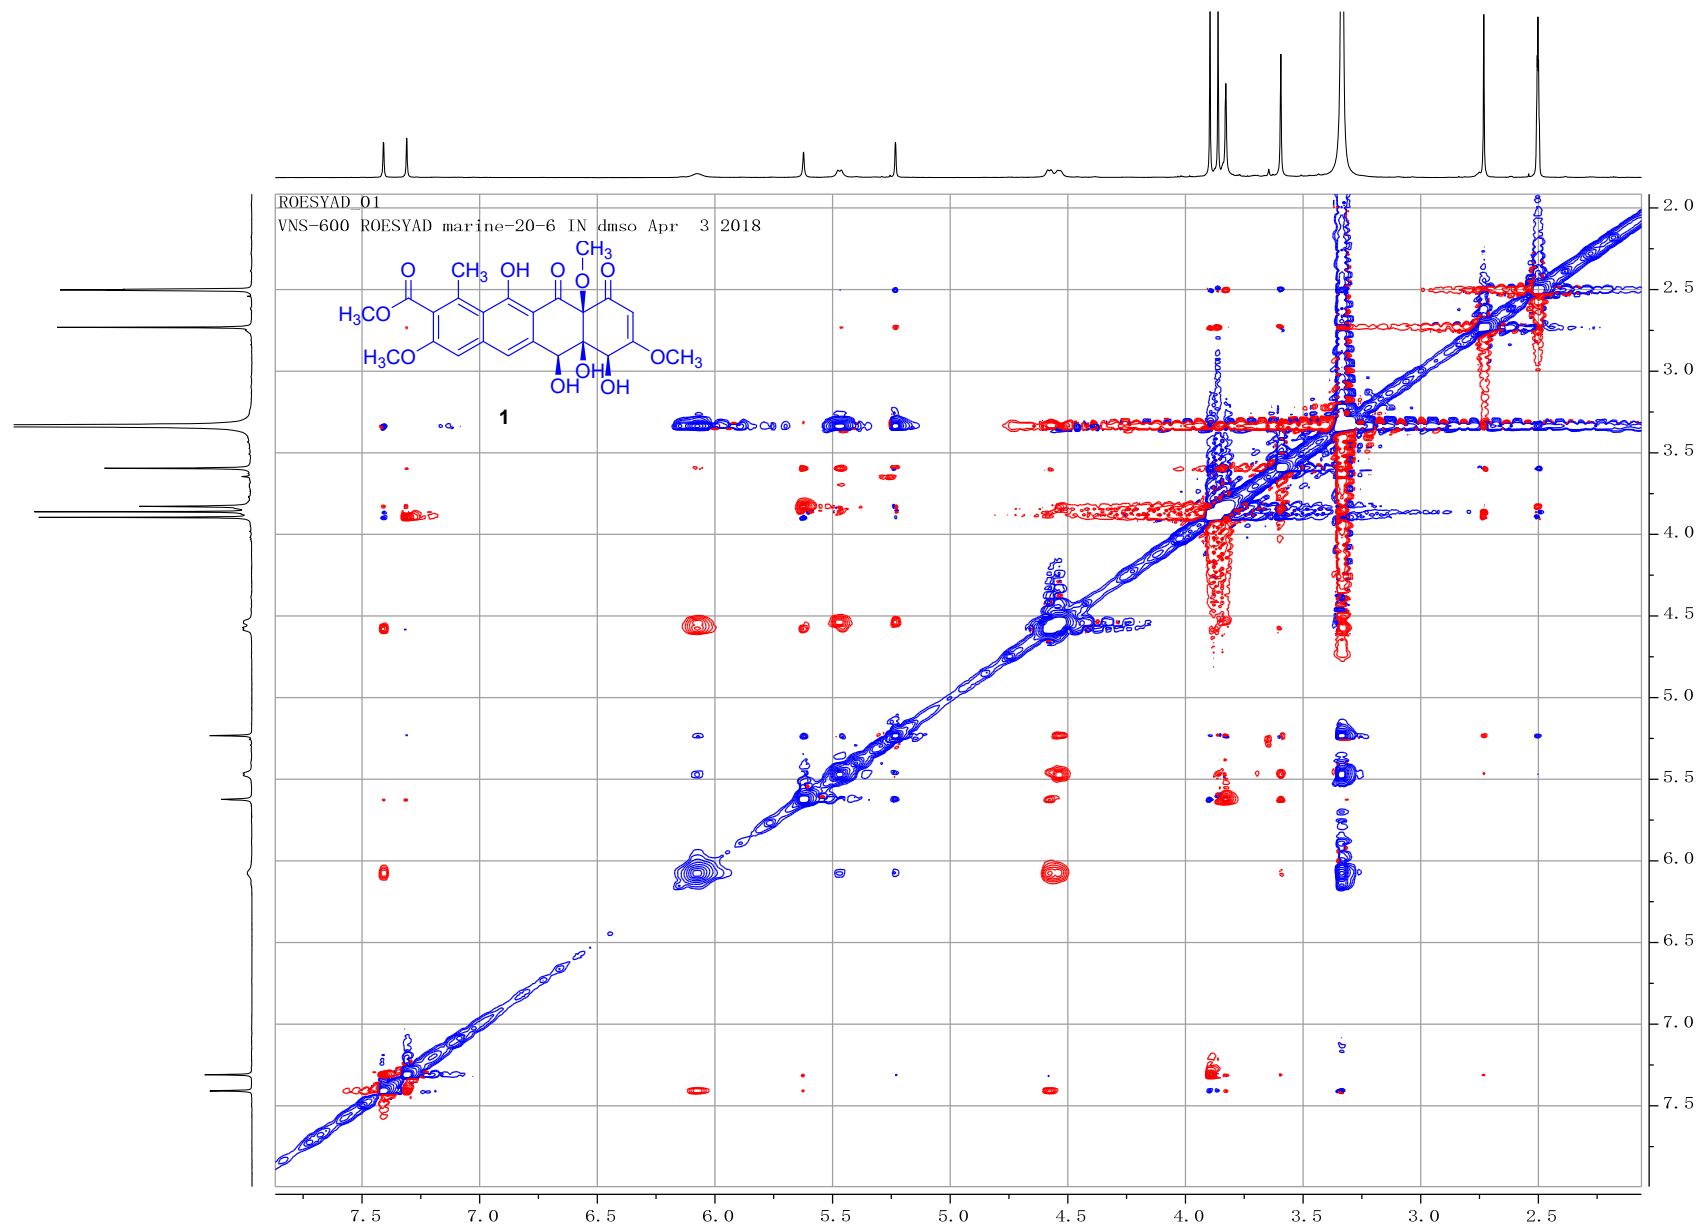

**Figure S10.** The ROESY spectrum of saccharothrixone E (**1**) in DMSO- $d_6$  (600 MHz).

marine-20-7 HRESI #13 RT: 0.20 AV: 1 NL: 2.80E6  
T: FTMS + c ESI Full ms [100.00-1000.00]

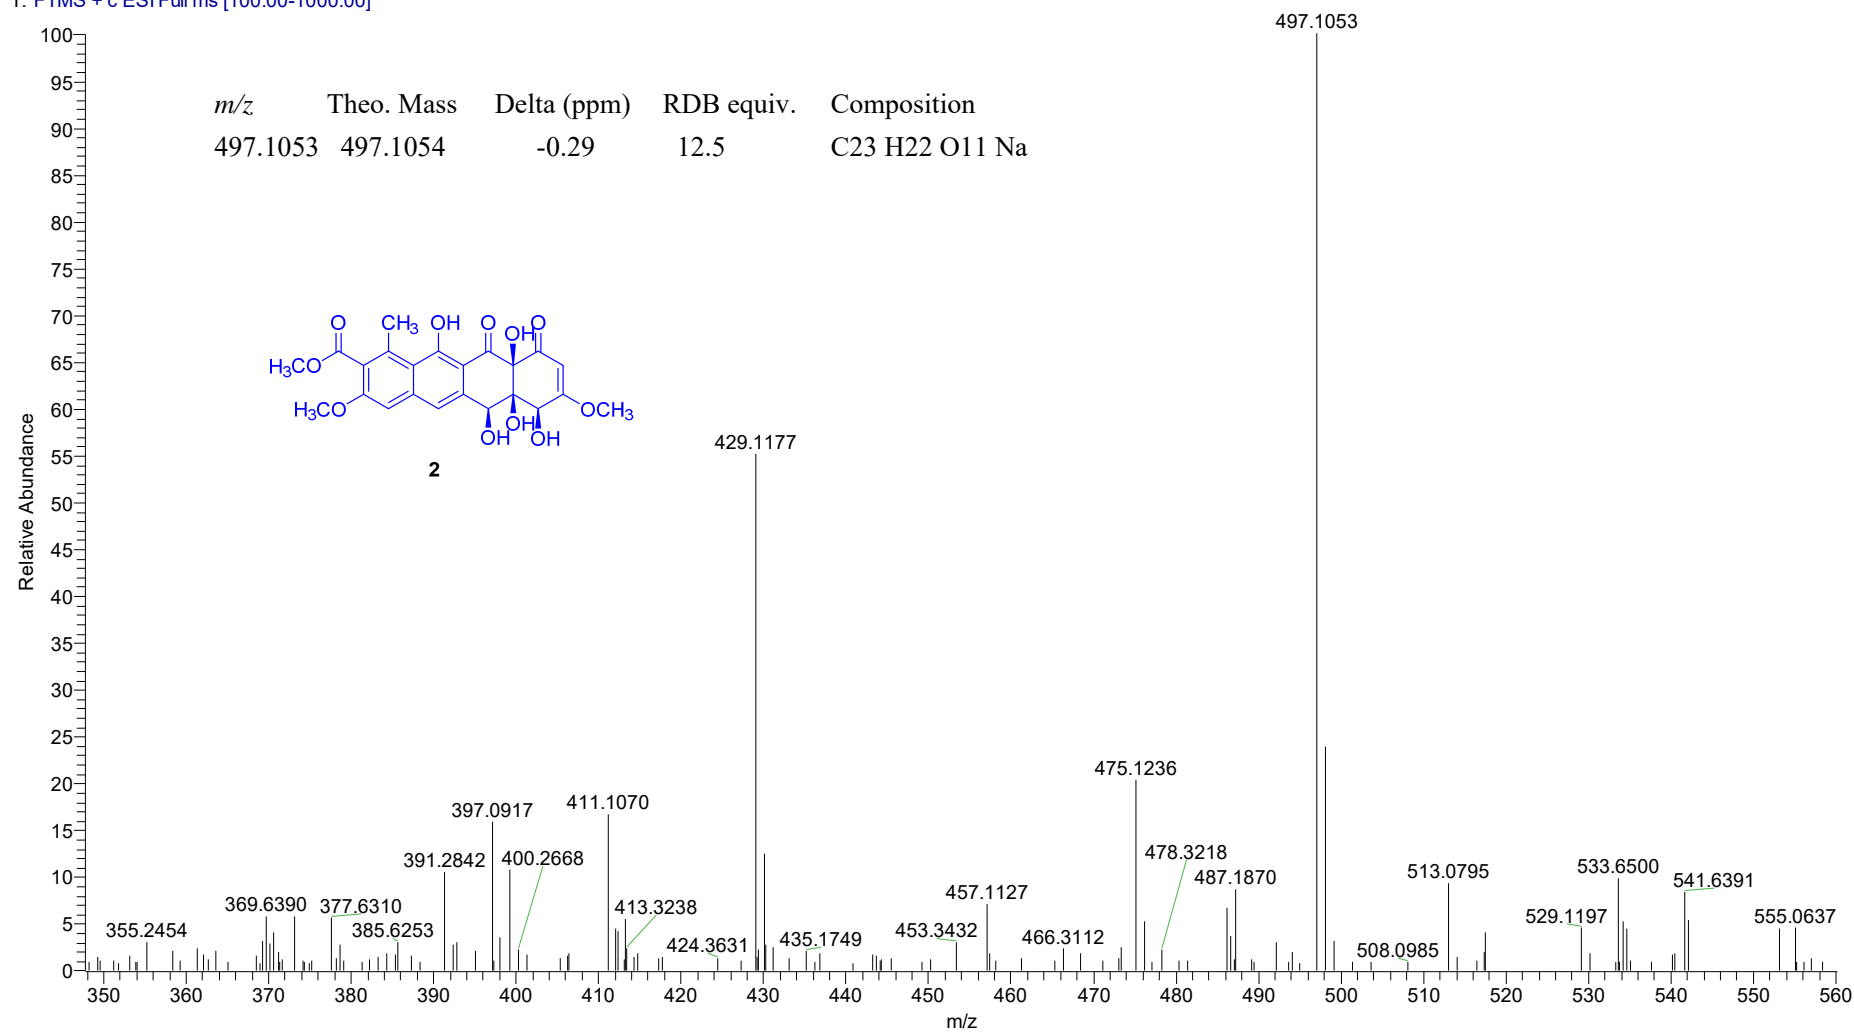

**Figure S11.** The (+)-HRESIMS spectrum of saccharothrixone F (**2**).

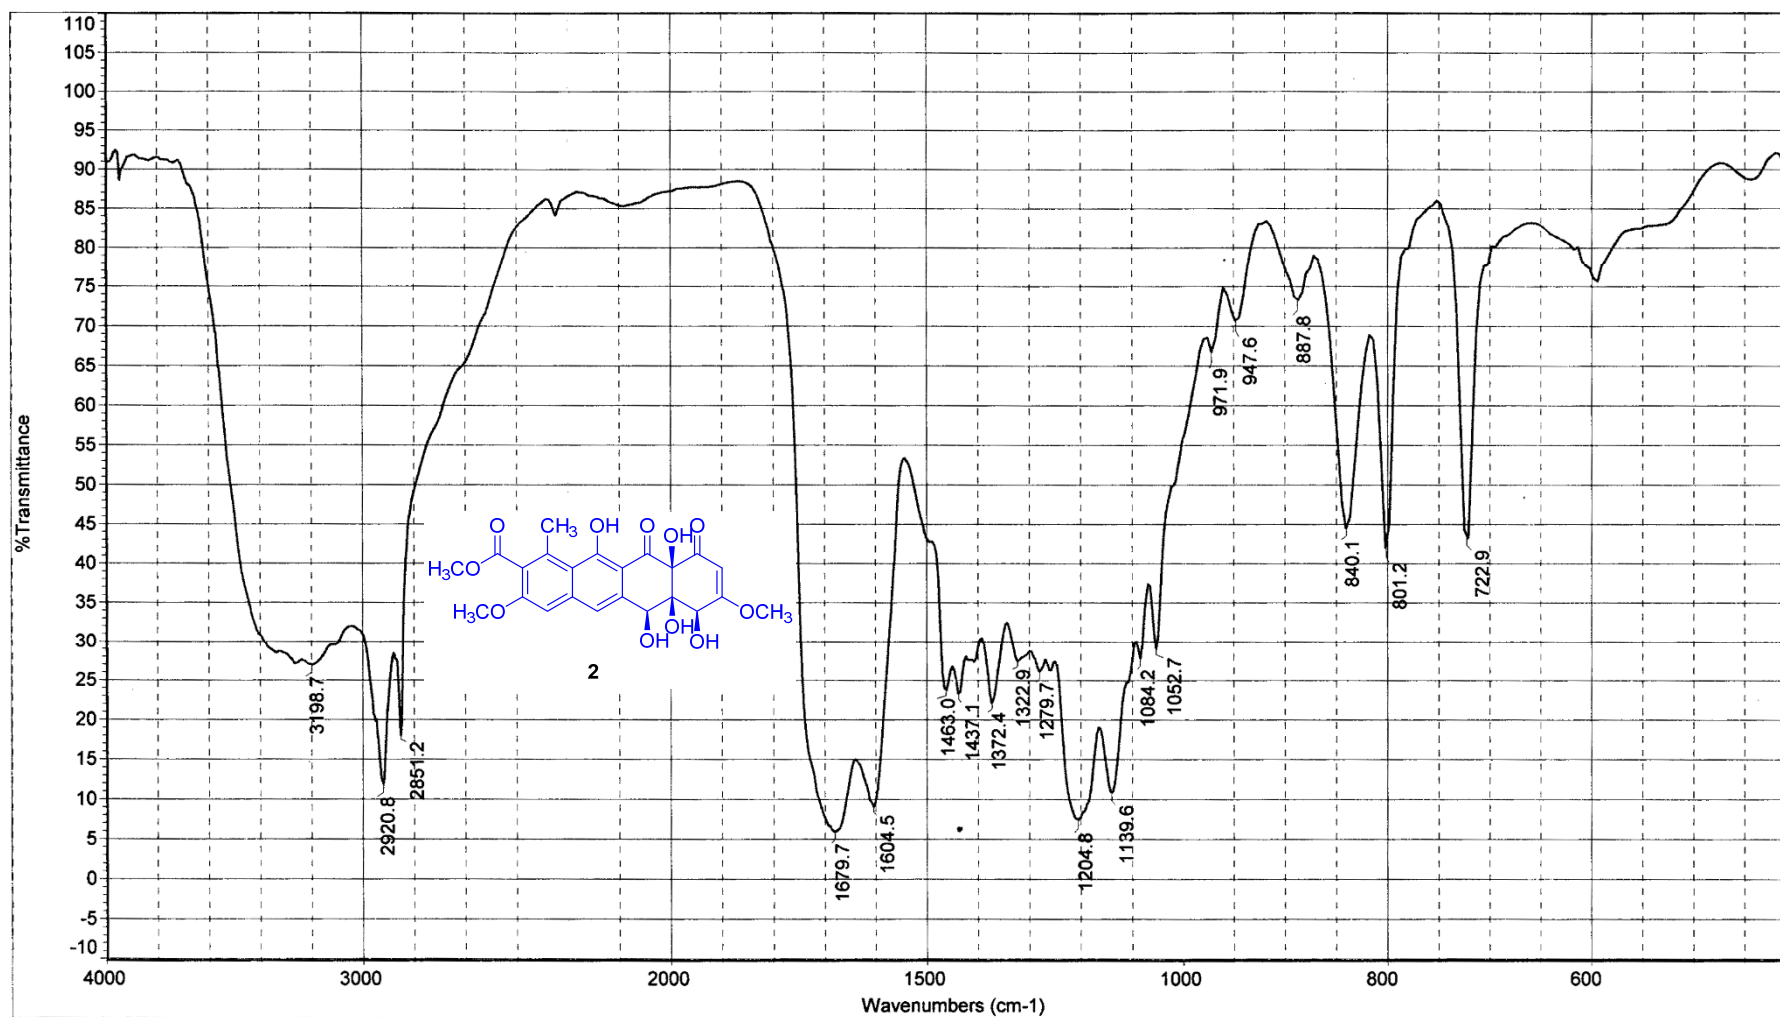

**Figure S12.** The IR spectrum of saccharothrixone F (2).

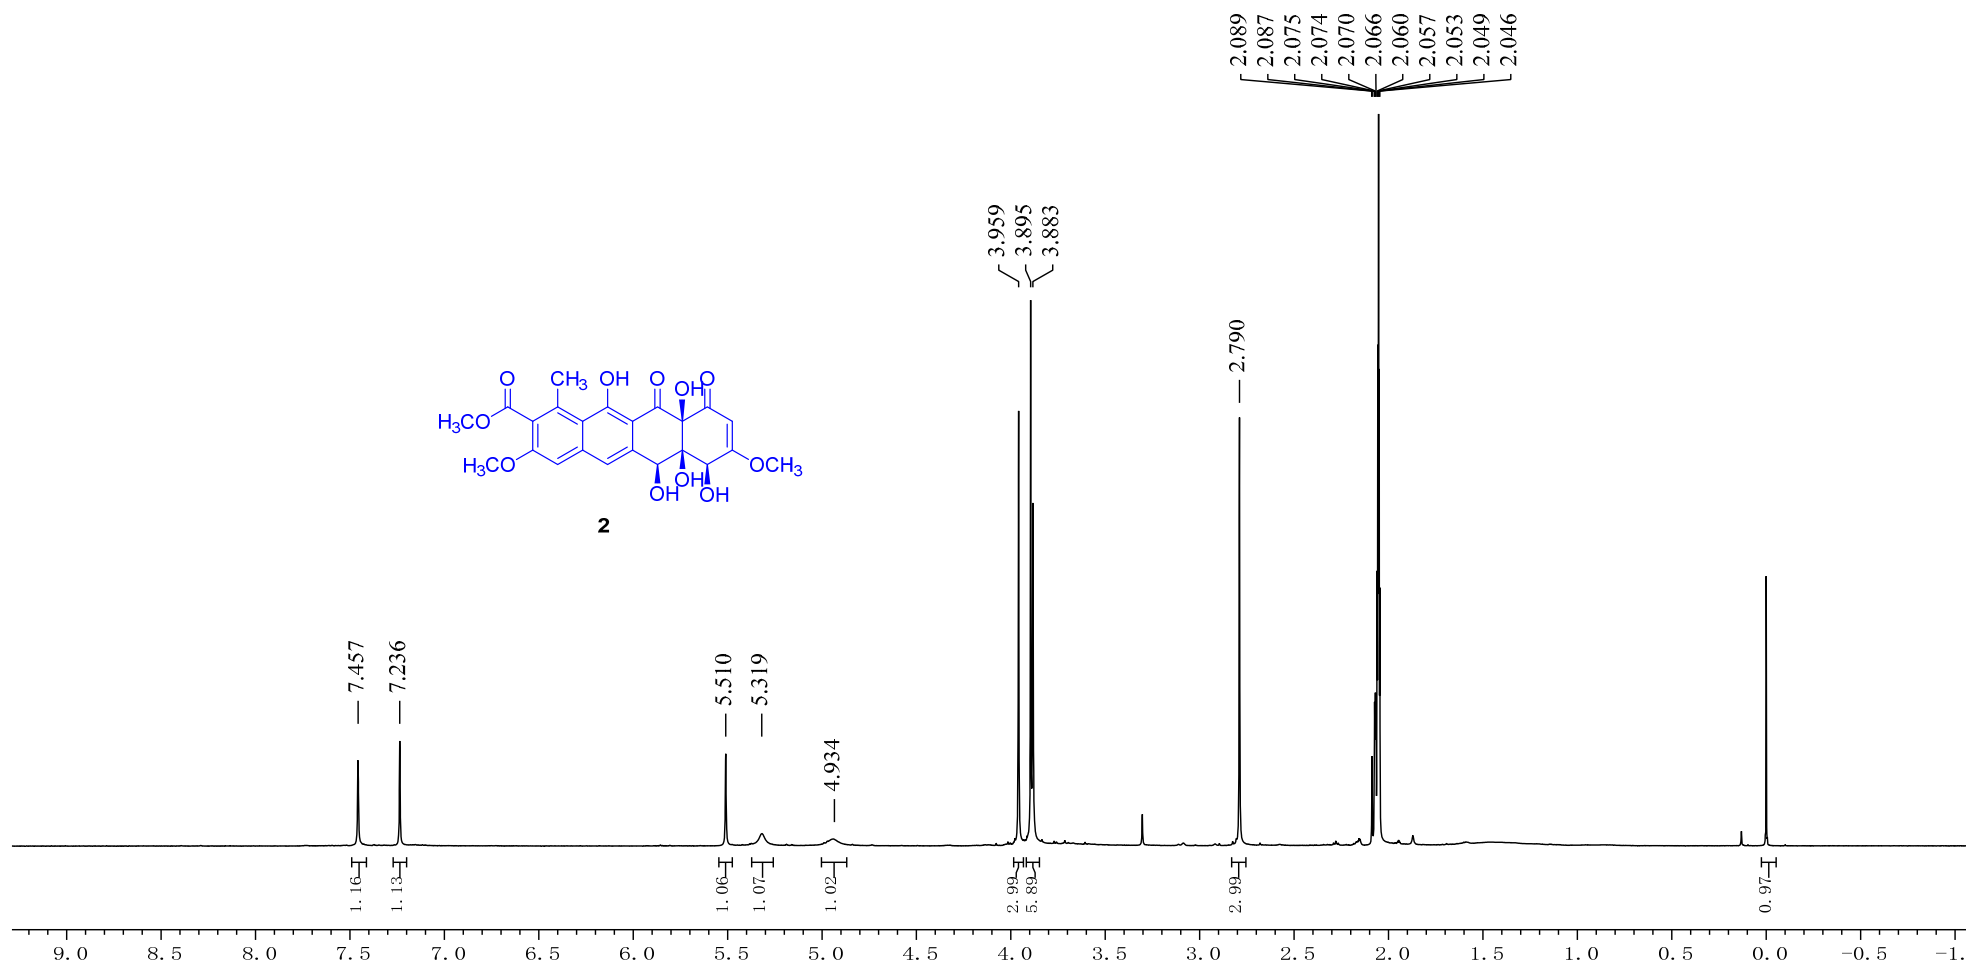

**Figure S13.** The  $^1\text{H}$  NMR spectrum of saccharothrixone F (**2**) in acetone- $d_6$  (600 MHz).

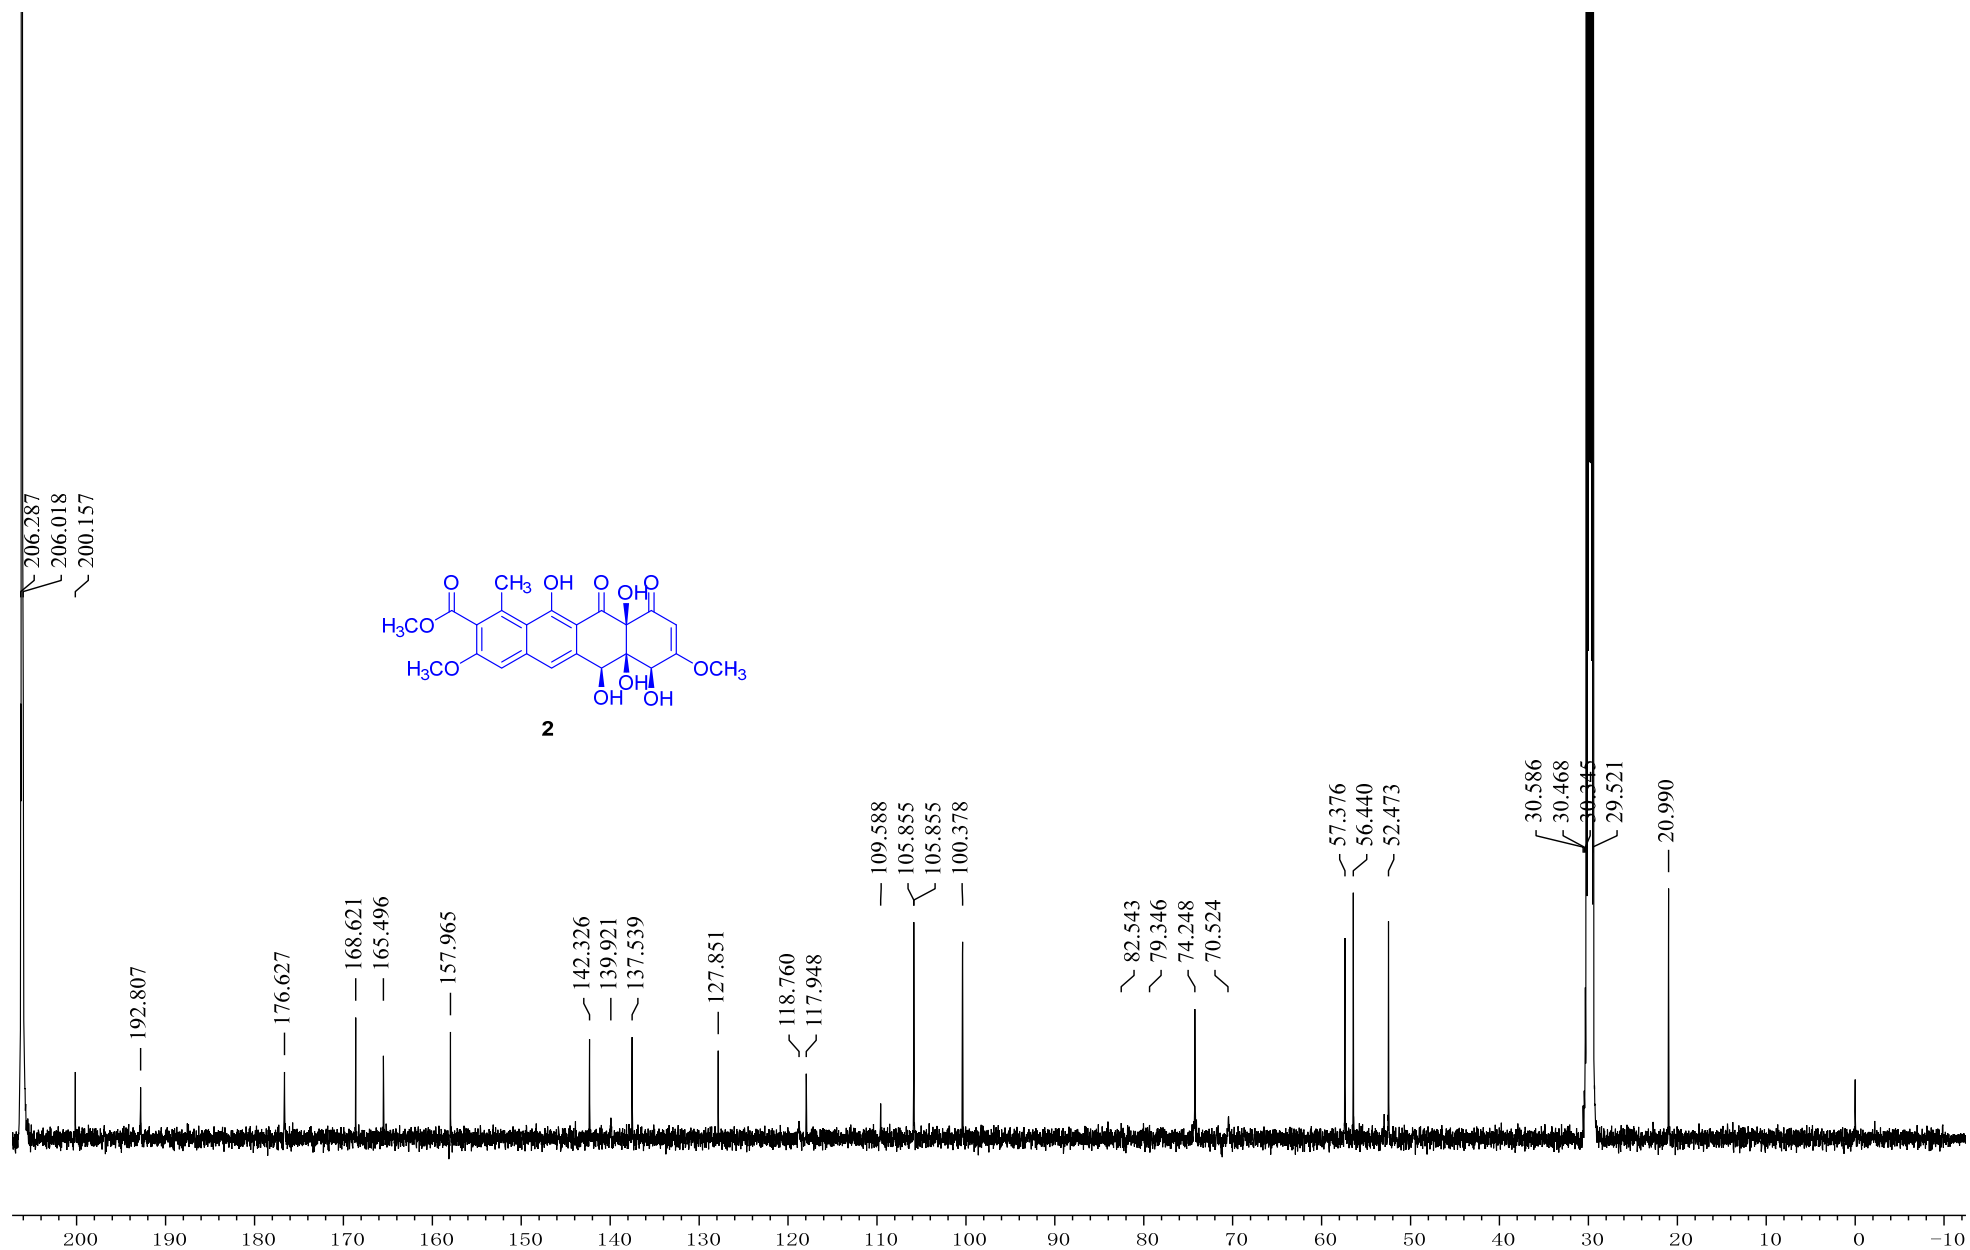

**Figure S14.** The  $^{13}\text{C}$  NMR spectrum of saccharothrixone F (**2**) in acetone- $d_6$  (150 MHz).

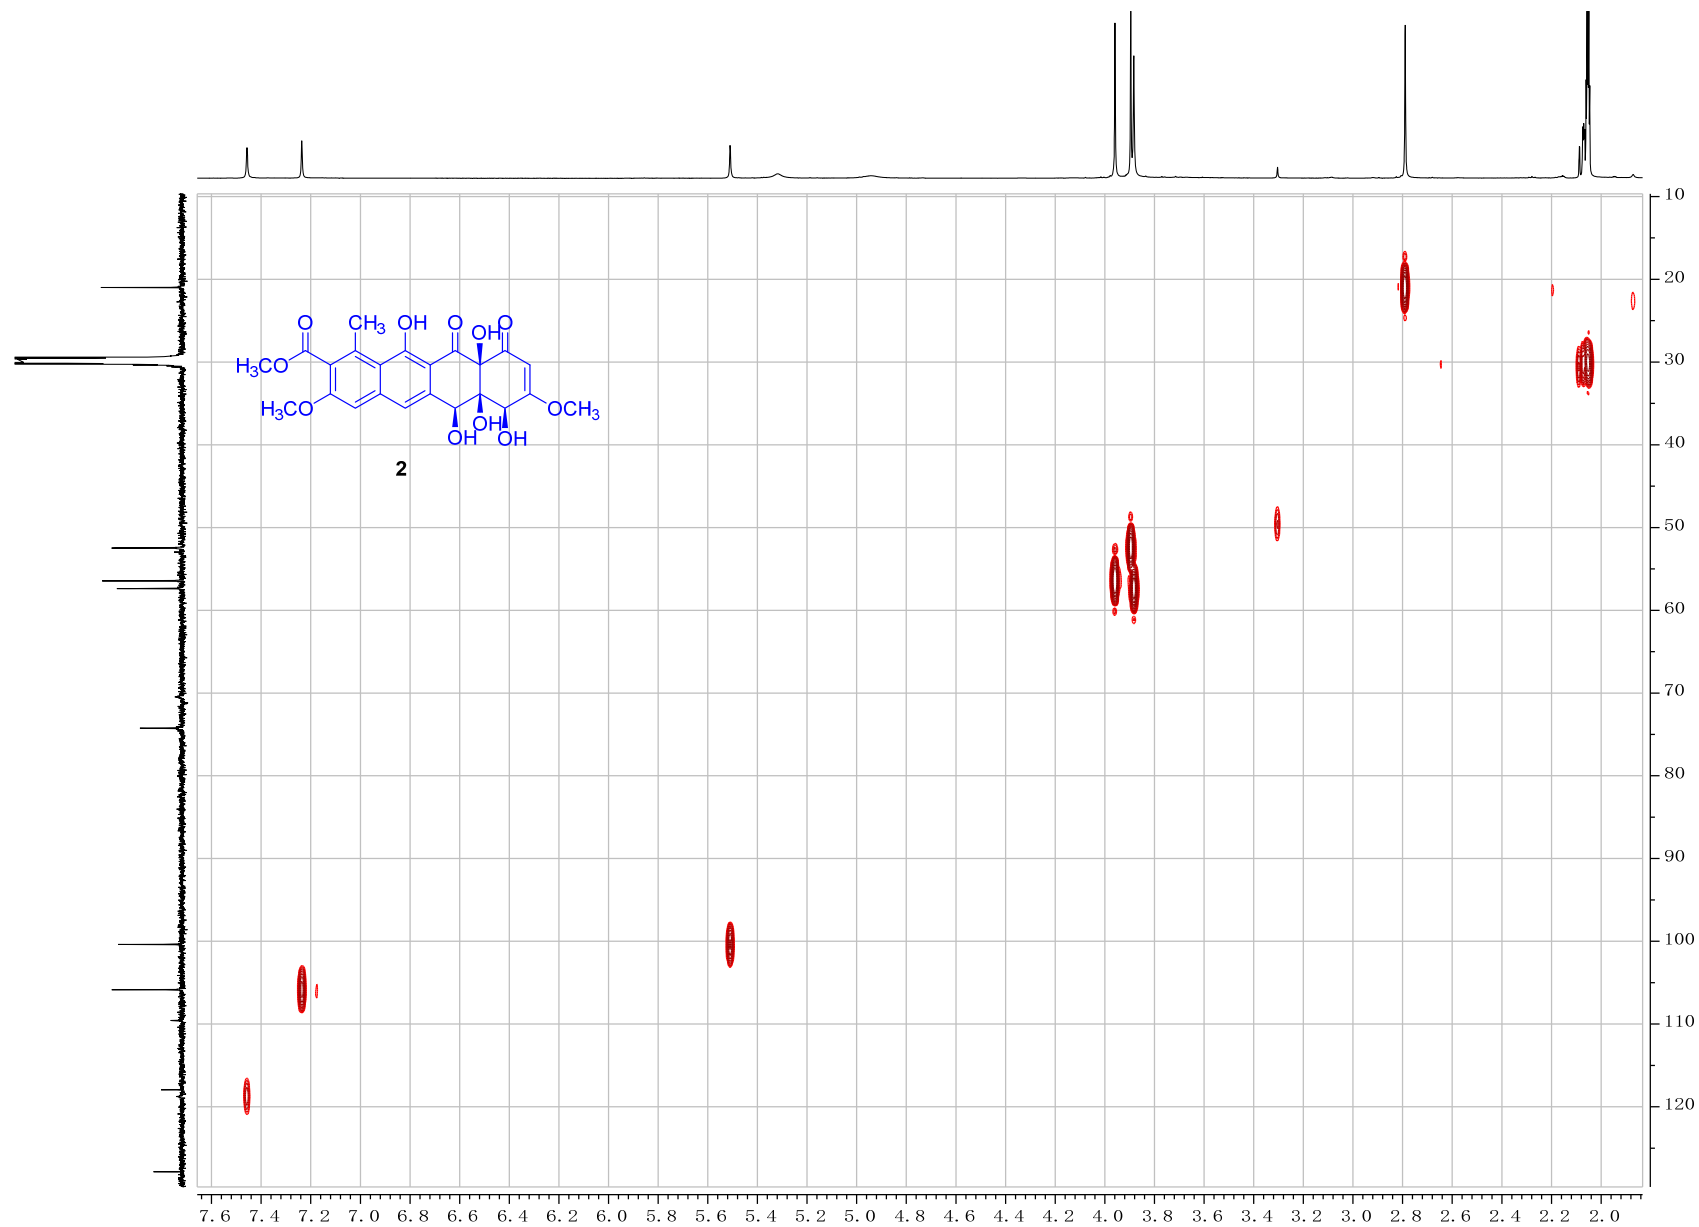

**Figure S15.** The HSQC spectrum of saccharothrixone F (**2**) in acetone- $d_6$  (600 MHz).

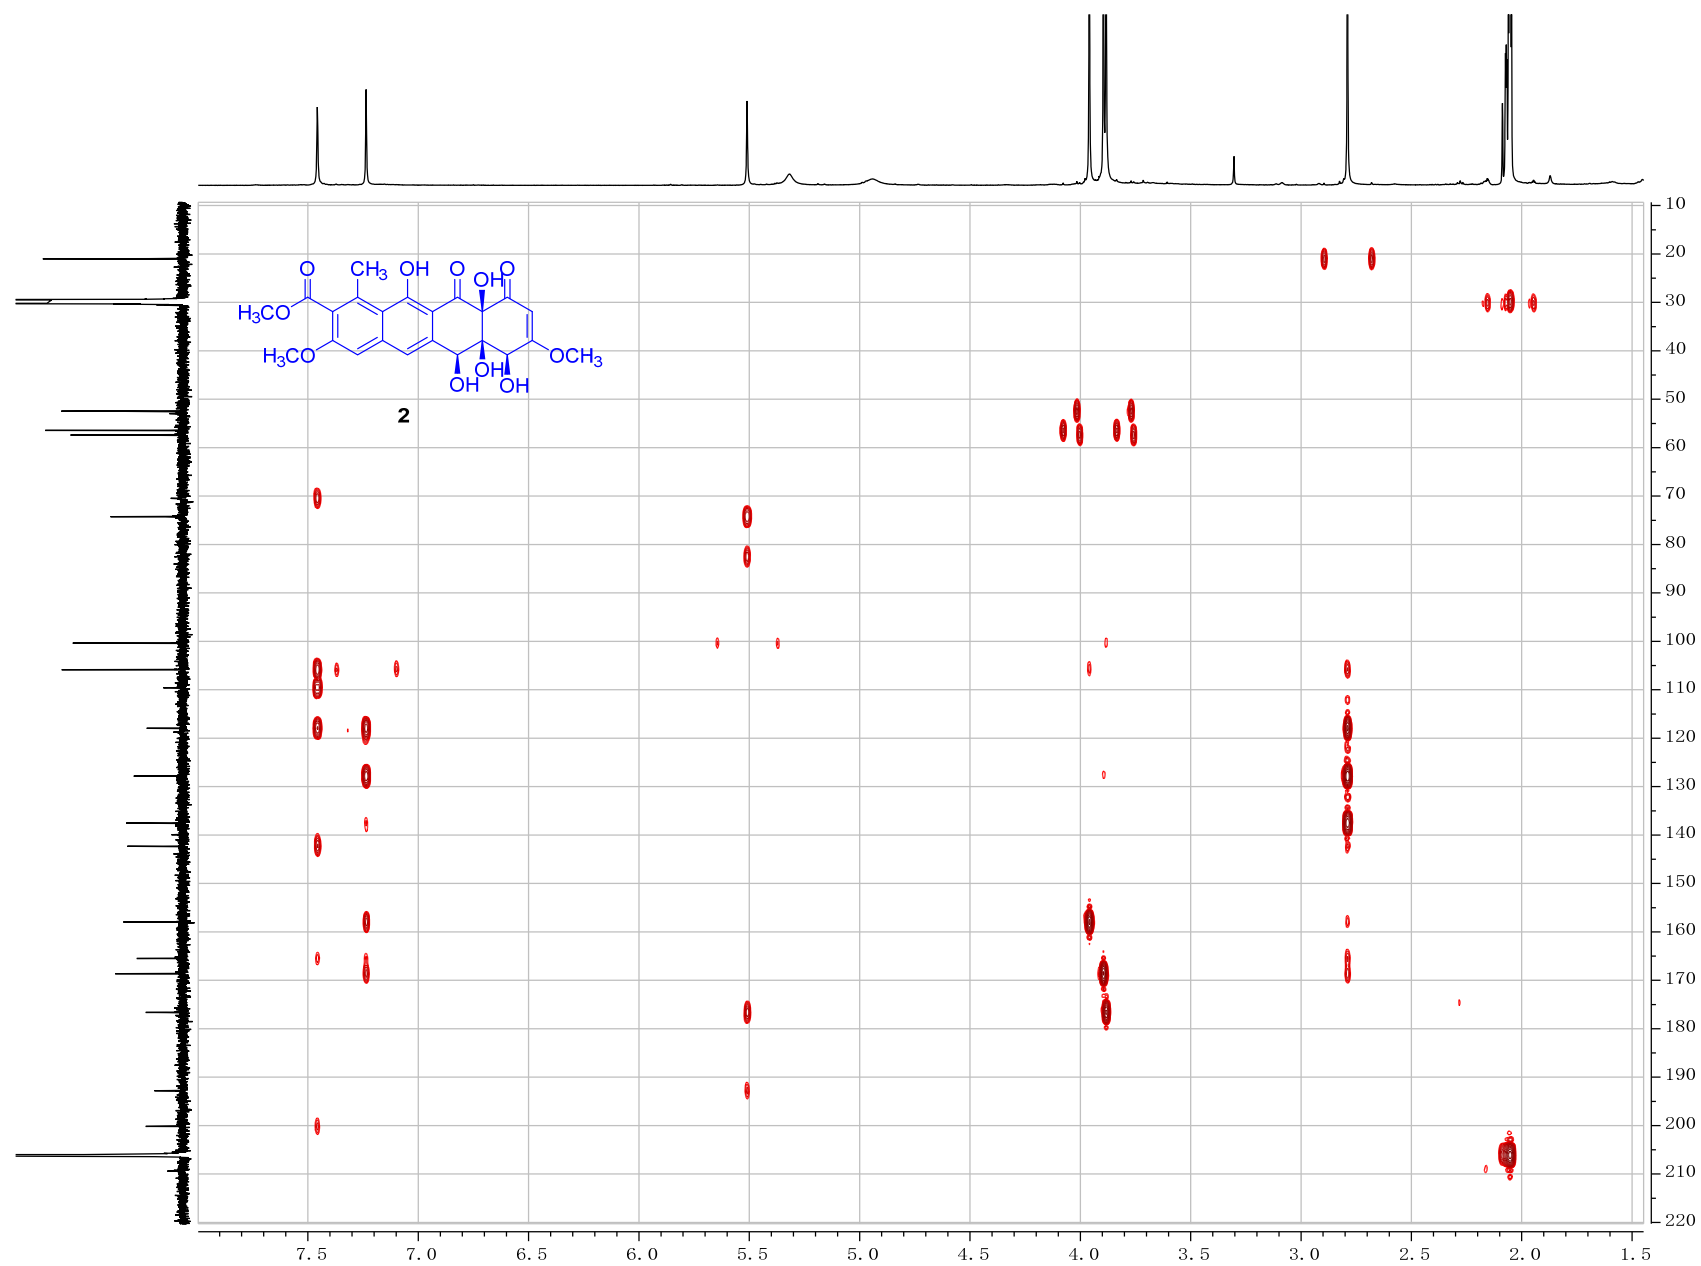

**Figure S16.** The HMBC spectrum of saccharothrixone F (**2**) in acetone- $d_6$  (600 MHz).

marine-20-10\_HRESI#25 RT: 0.92 AV: 1 NL: 5.16E4  
T: FTMS - c ESI Full ms [450.00-550.00]

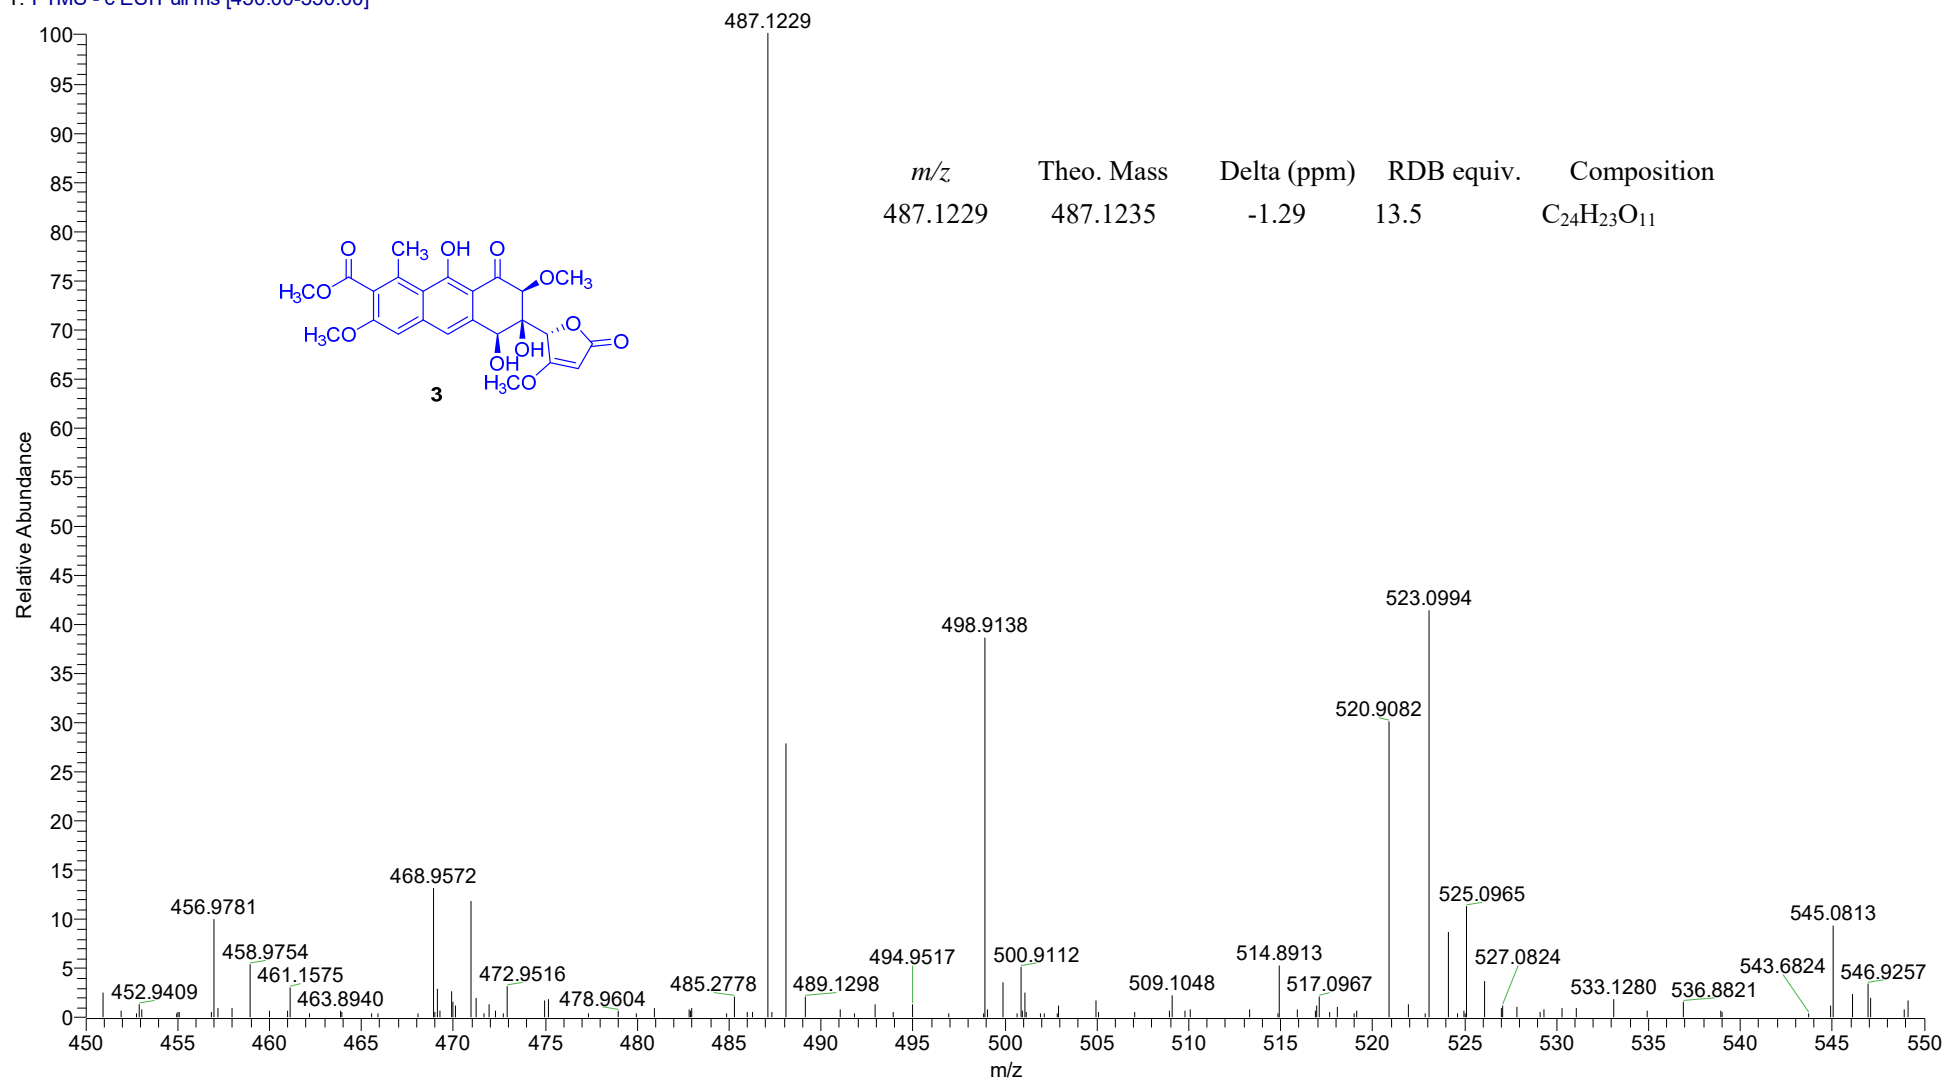

Figure S17. The (–)-HRESIMS spectrum of saccharothrixone G (3).



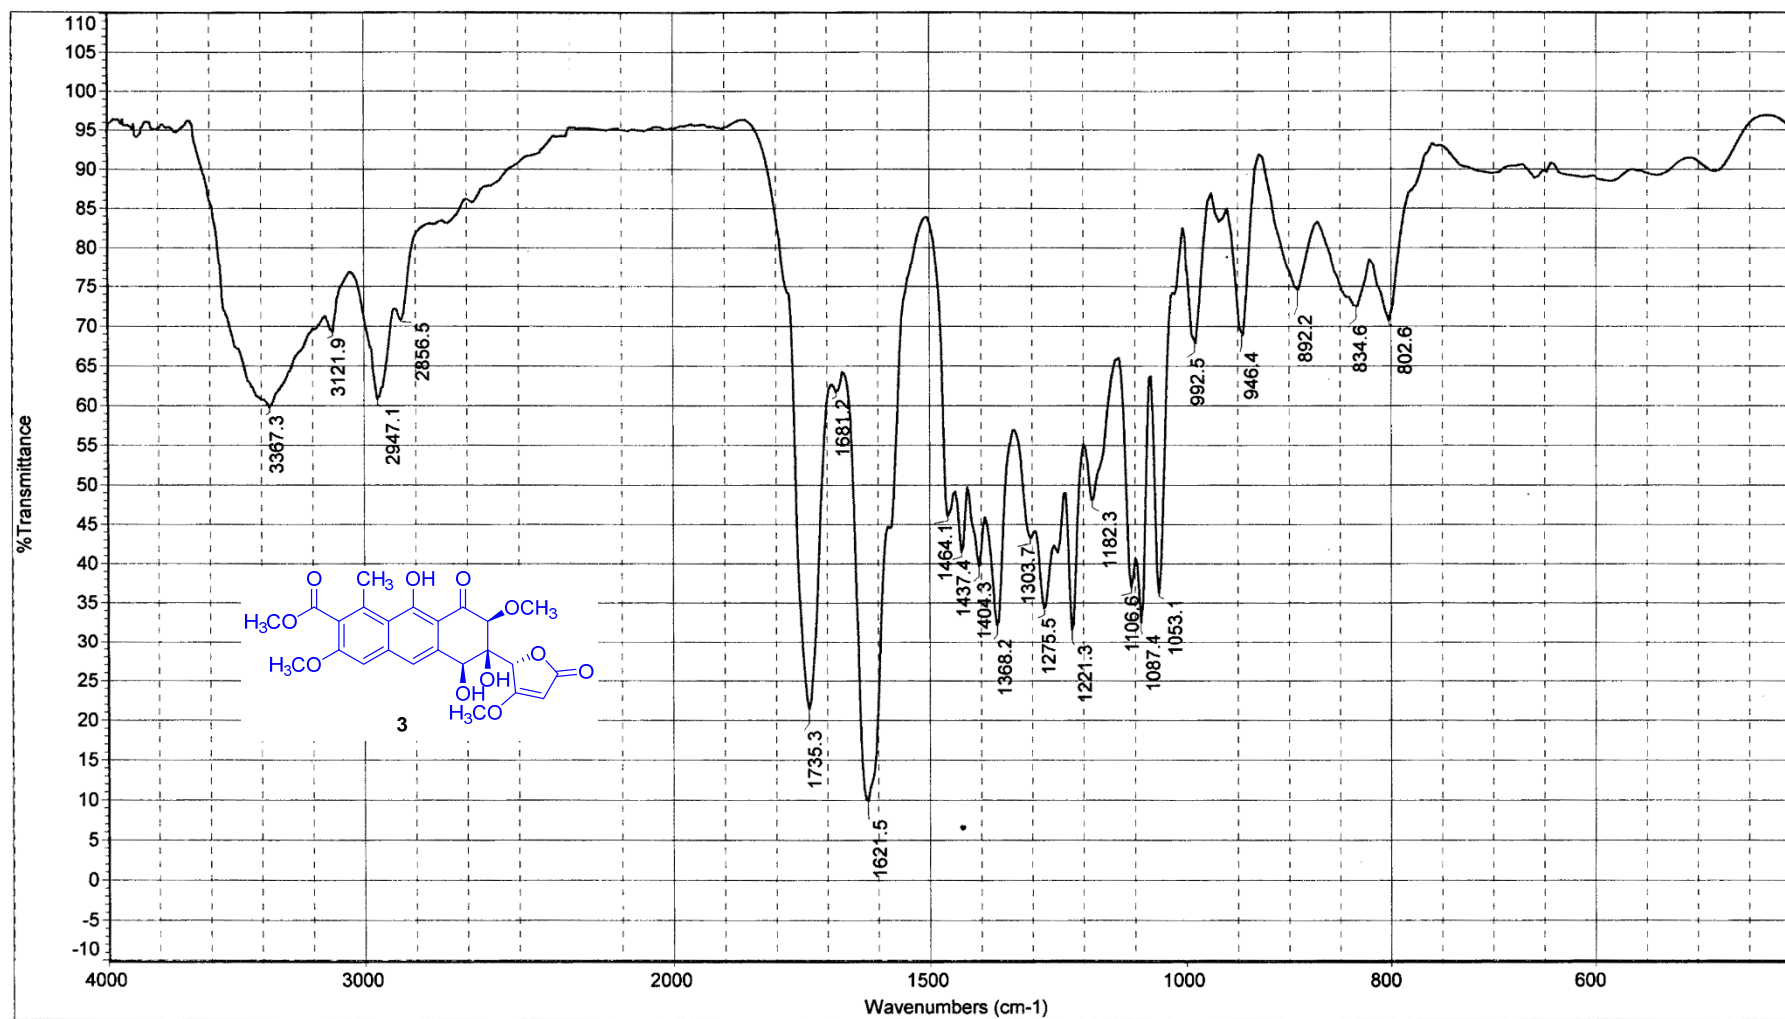

**Figure S18.** The IR spectrum of saccharothrixone G (**3**).

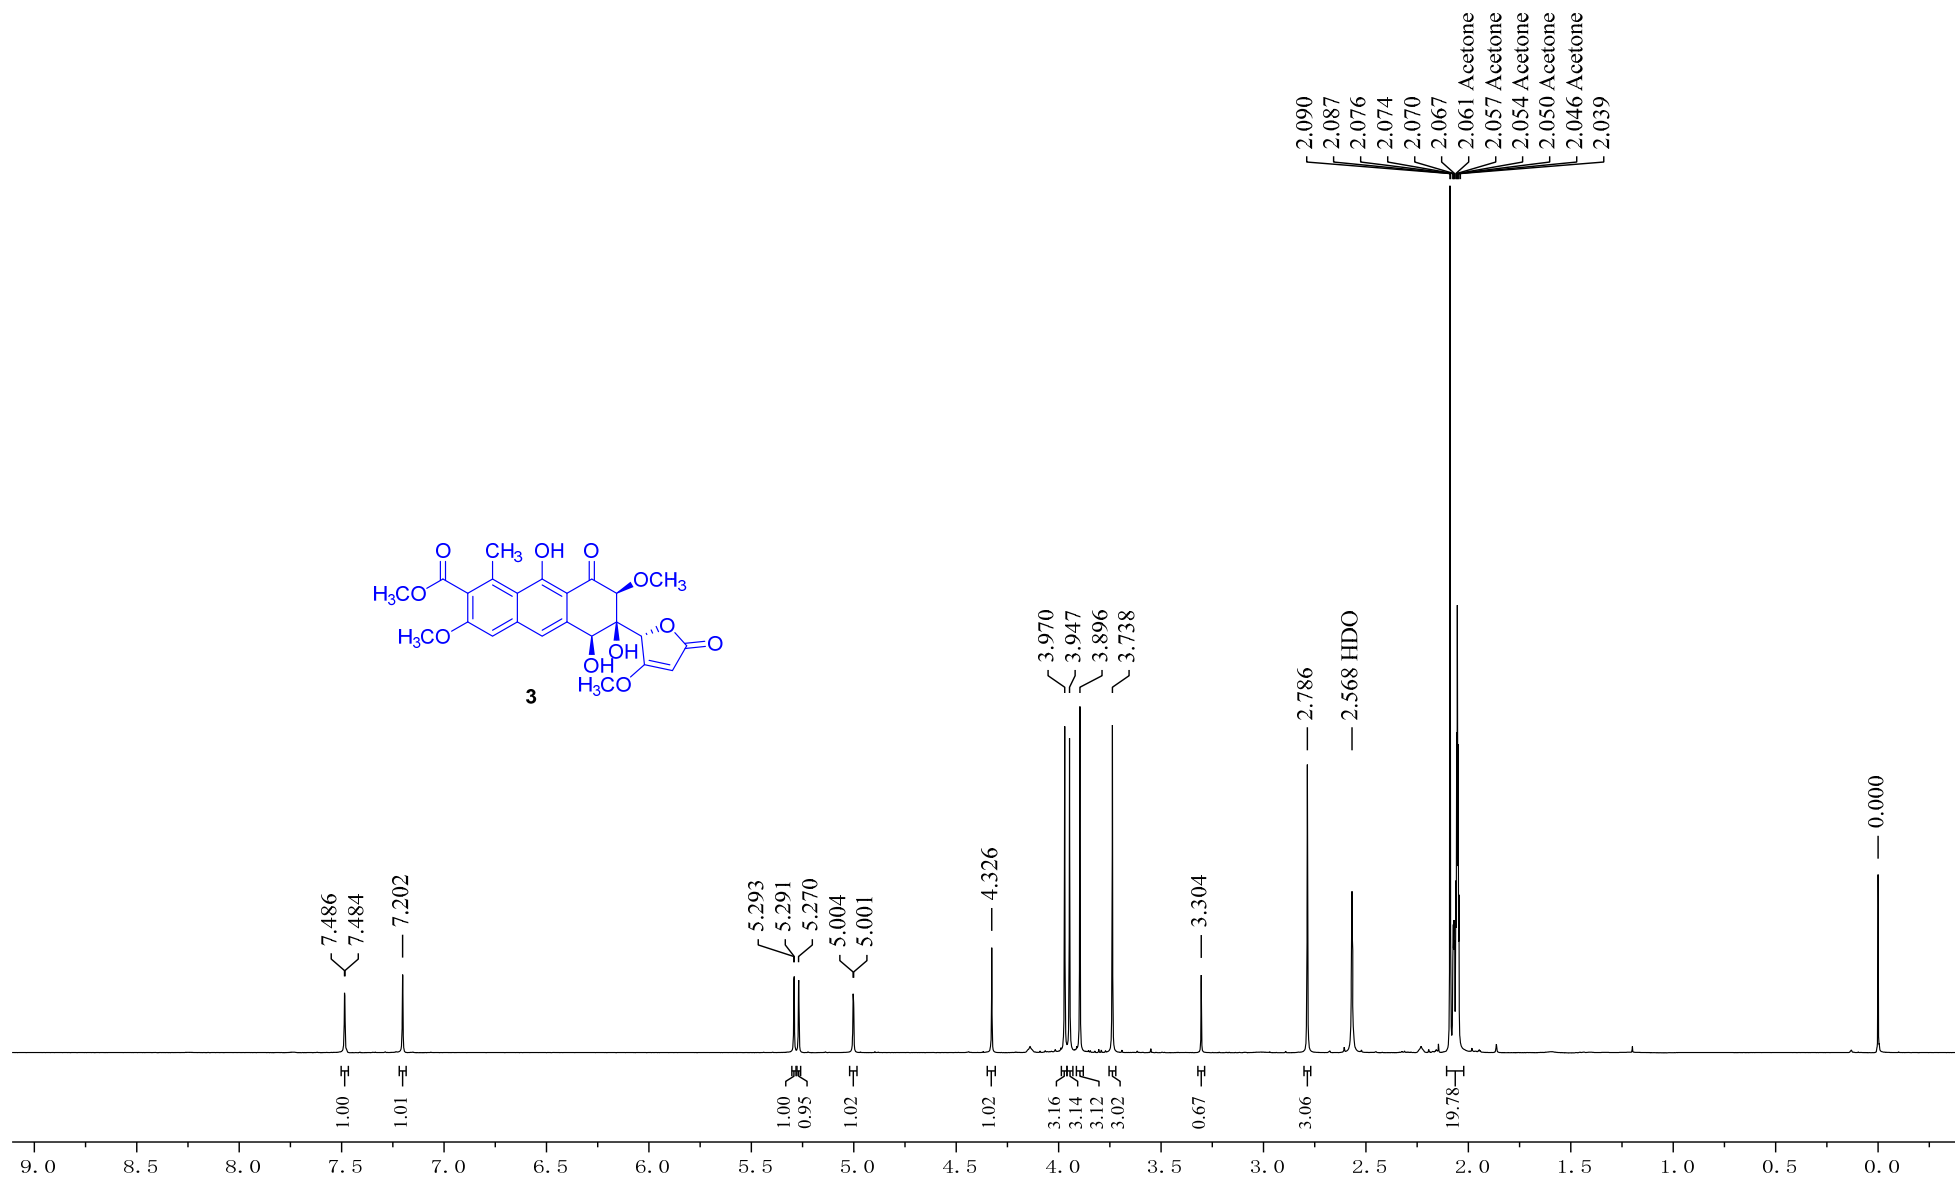

**Figure S19.** The  $^1\text{H}$  NMR spectrum of saccharothrixone G (**3**) in acetone- $d_6$  (600 MHz).

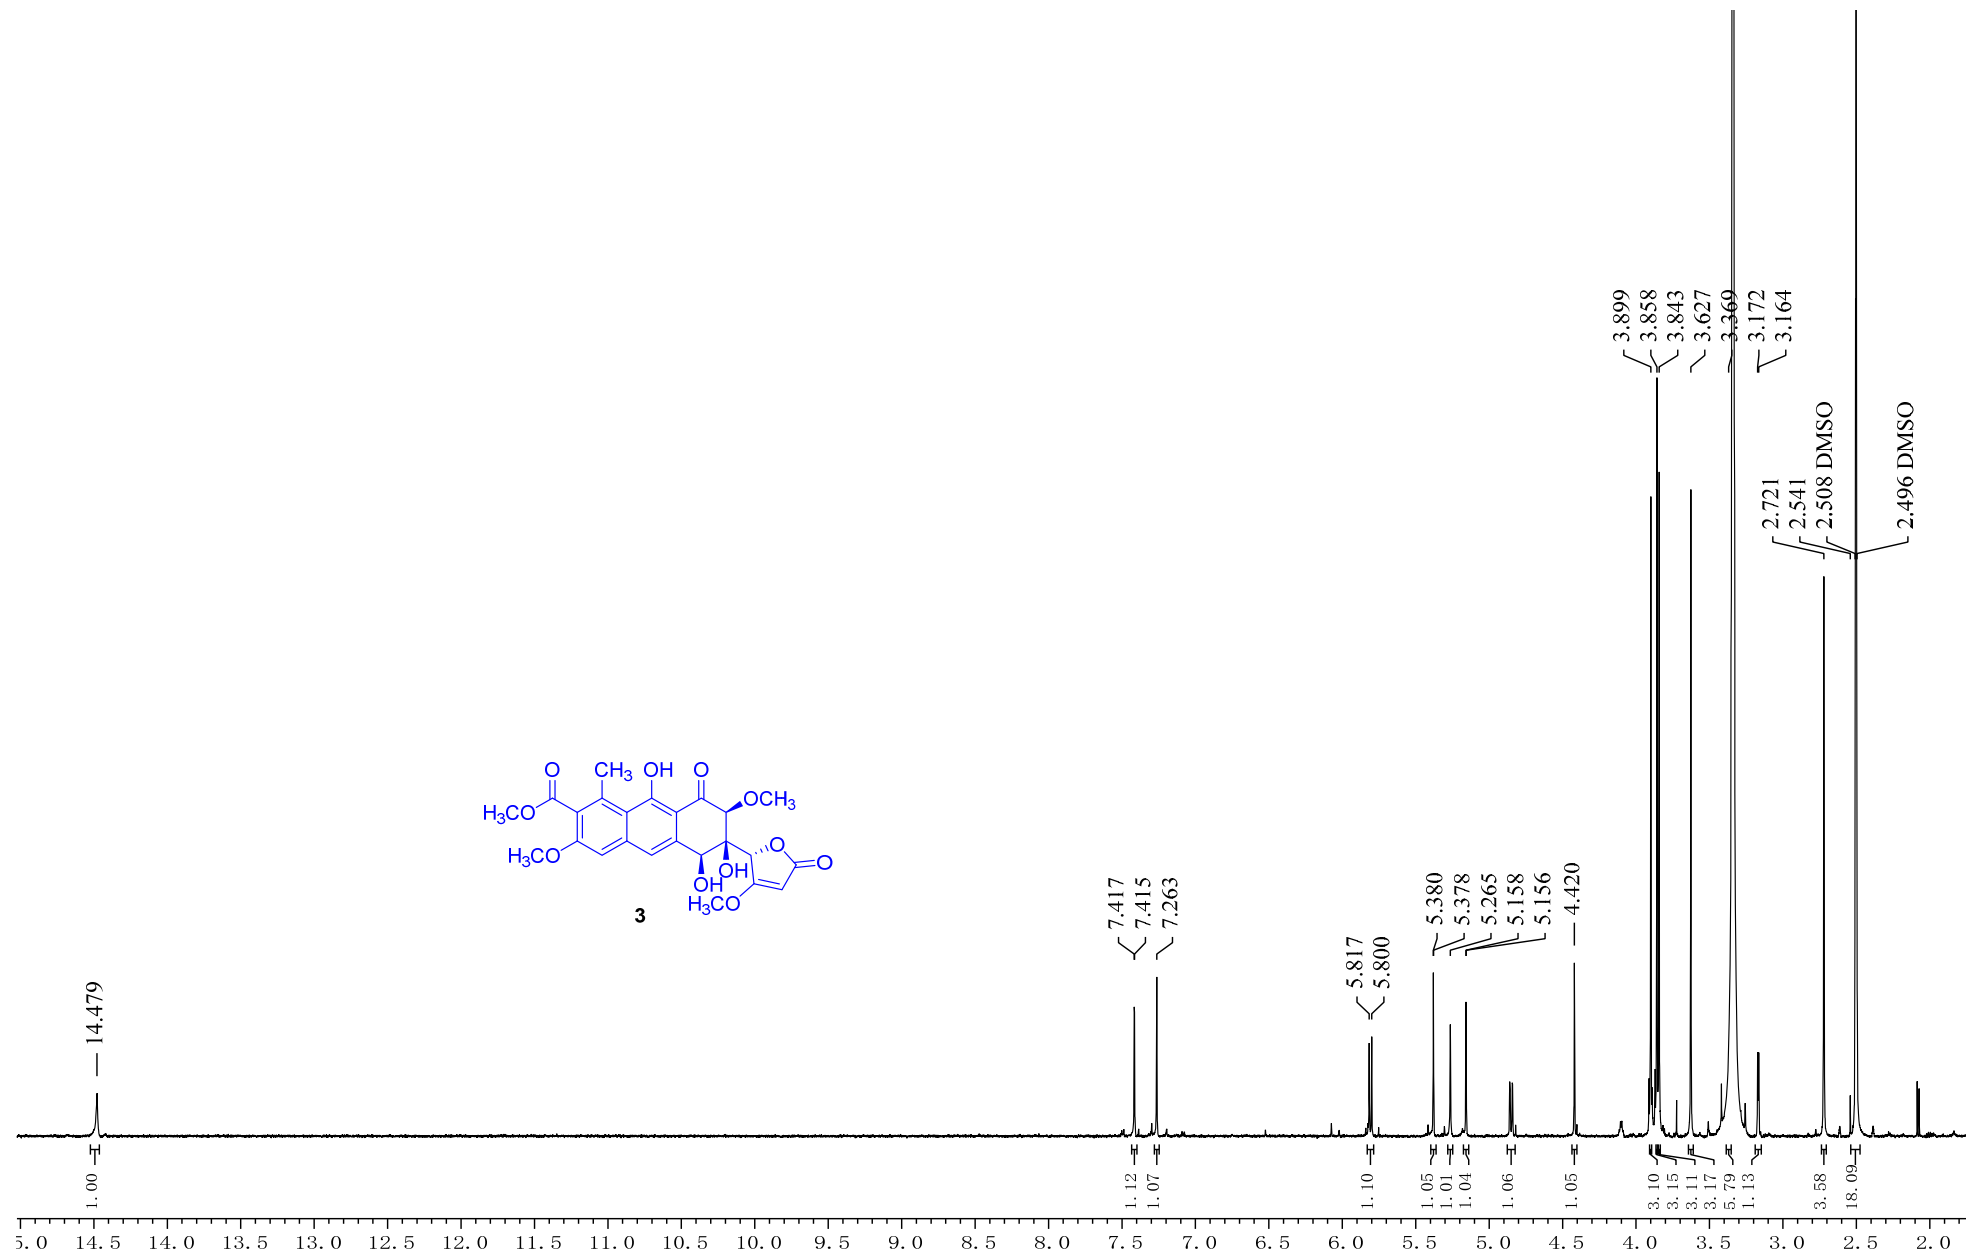

**Figure S20.** The <sup>1</sup>H NMR spectrum of saccharothrixone G (3) in DMSO-*d*<sub>6</sub> (600 MHz).

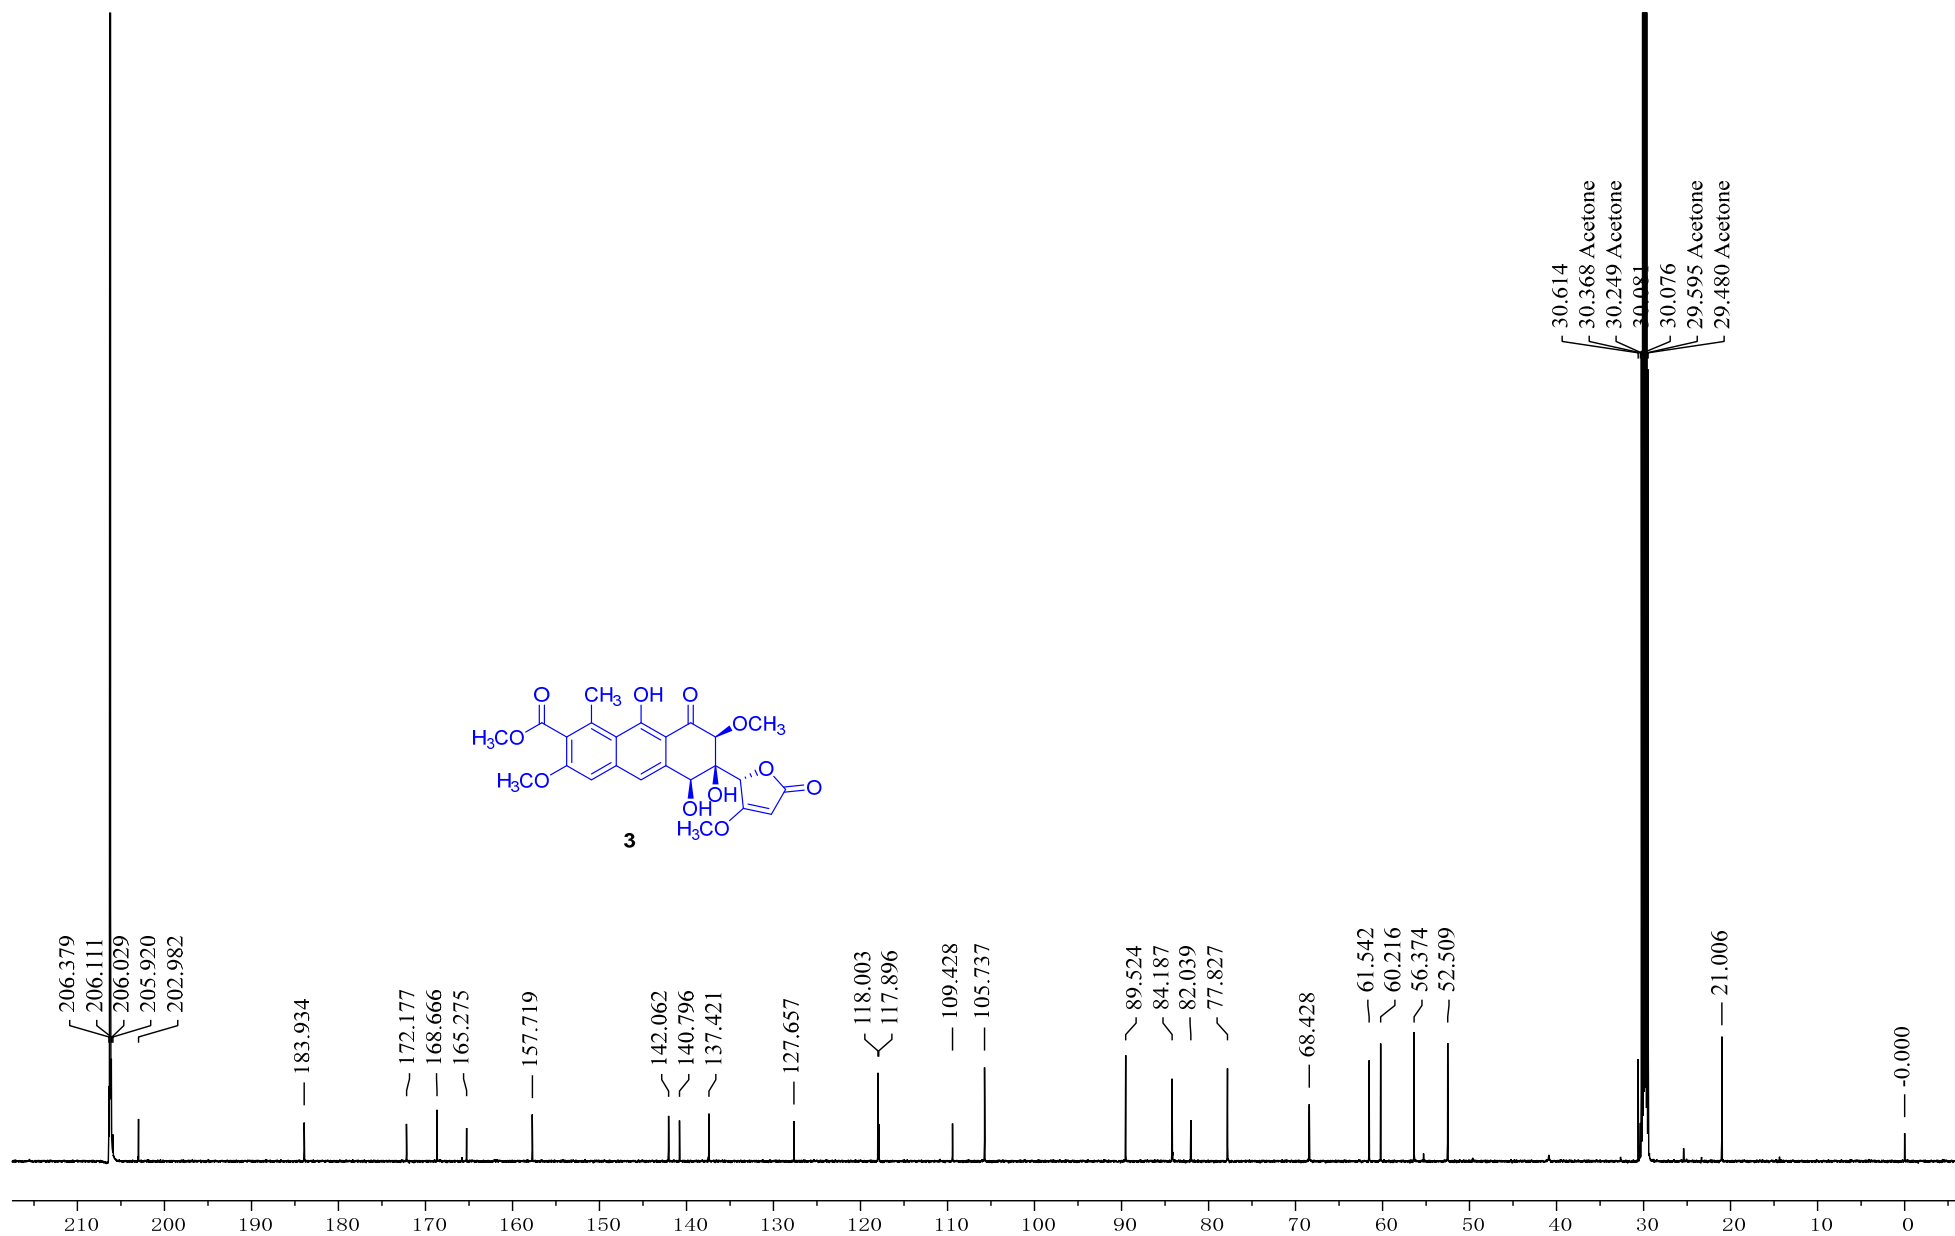

**Figure S21.** The  $^{13}\text{C}$  NMR spectrum of saccharothrixone G (**3**) in acetone- $d_6$  (150 MHz).

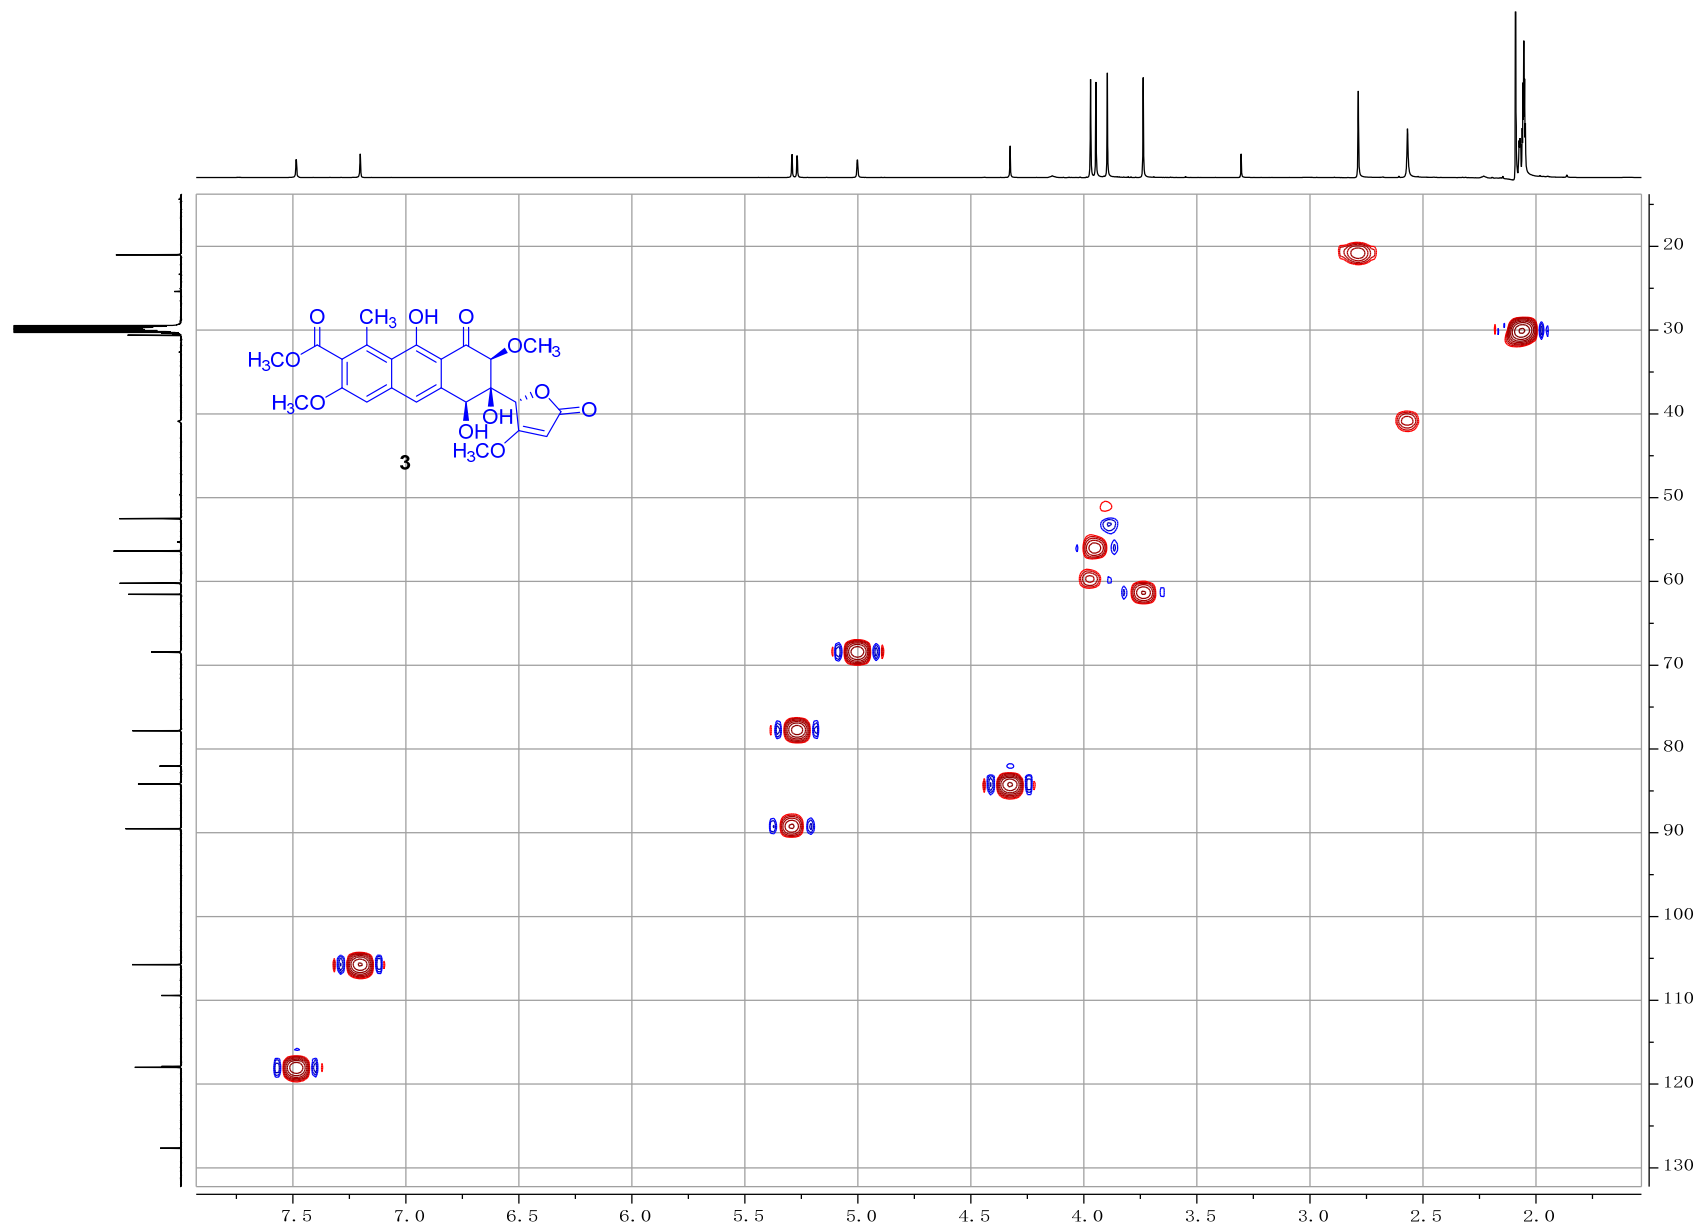

**Figure S22.** The HSQC spectrum of saccharothrixone G (**3**) in acetone- $d_6$  (600 MHz).

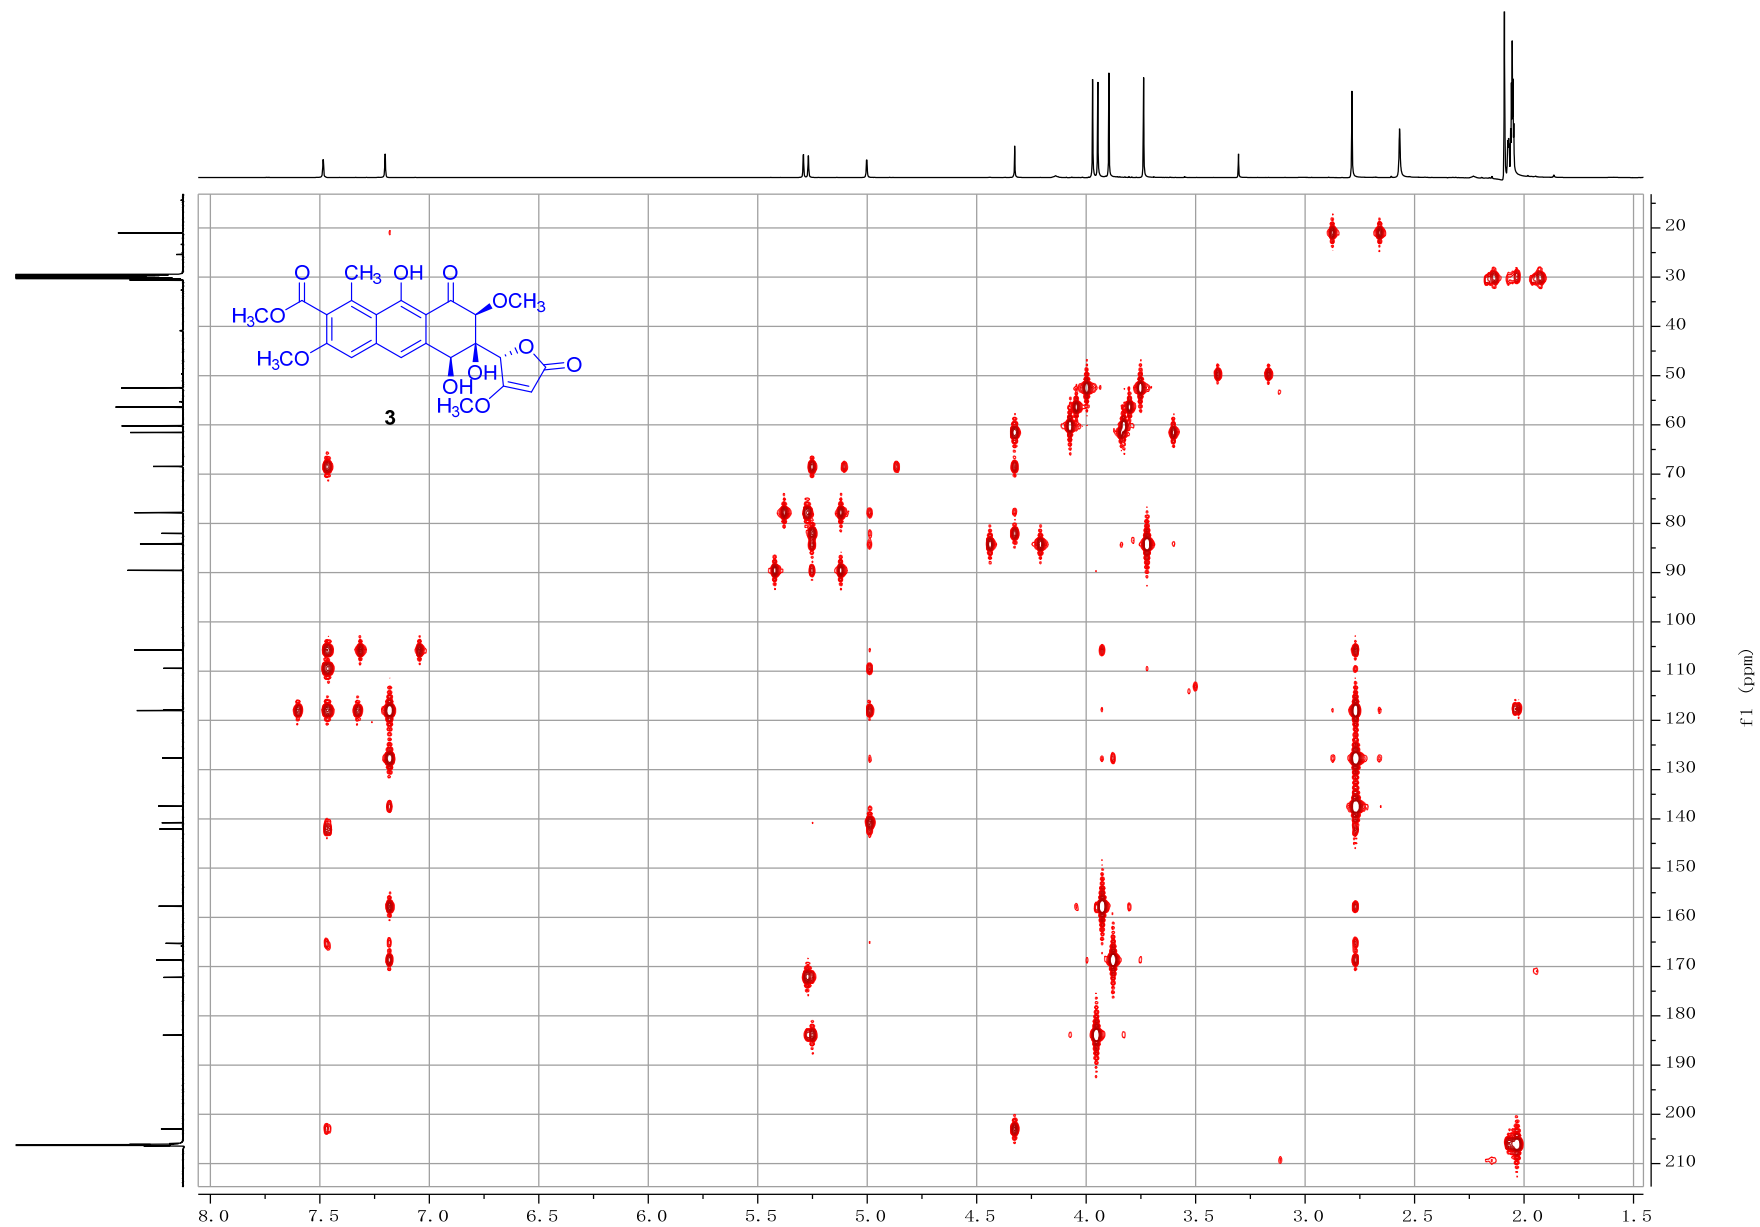

**Figure S23.** The HMBC spectrum of saccharothrixone G (**3**) in acetone- $d_6$  (600 MHz).

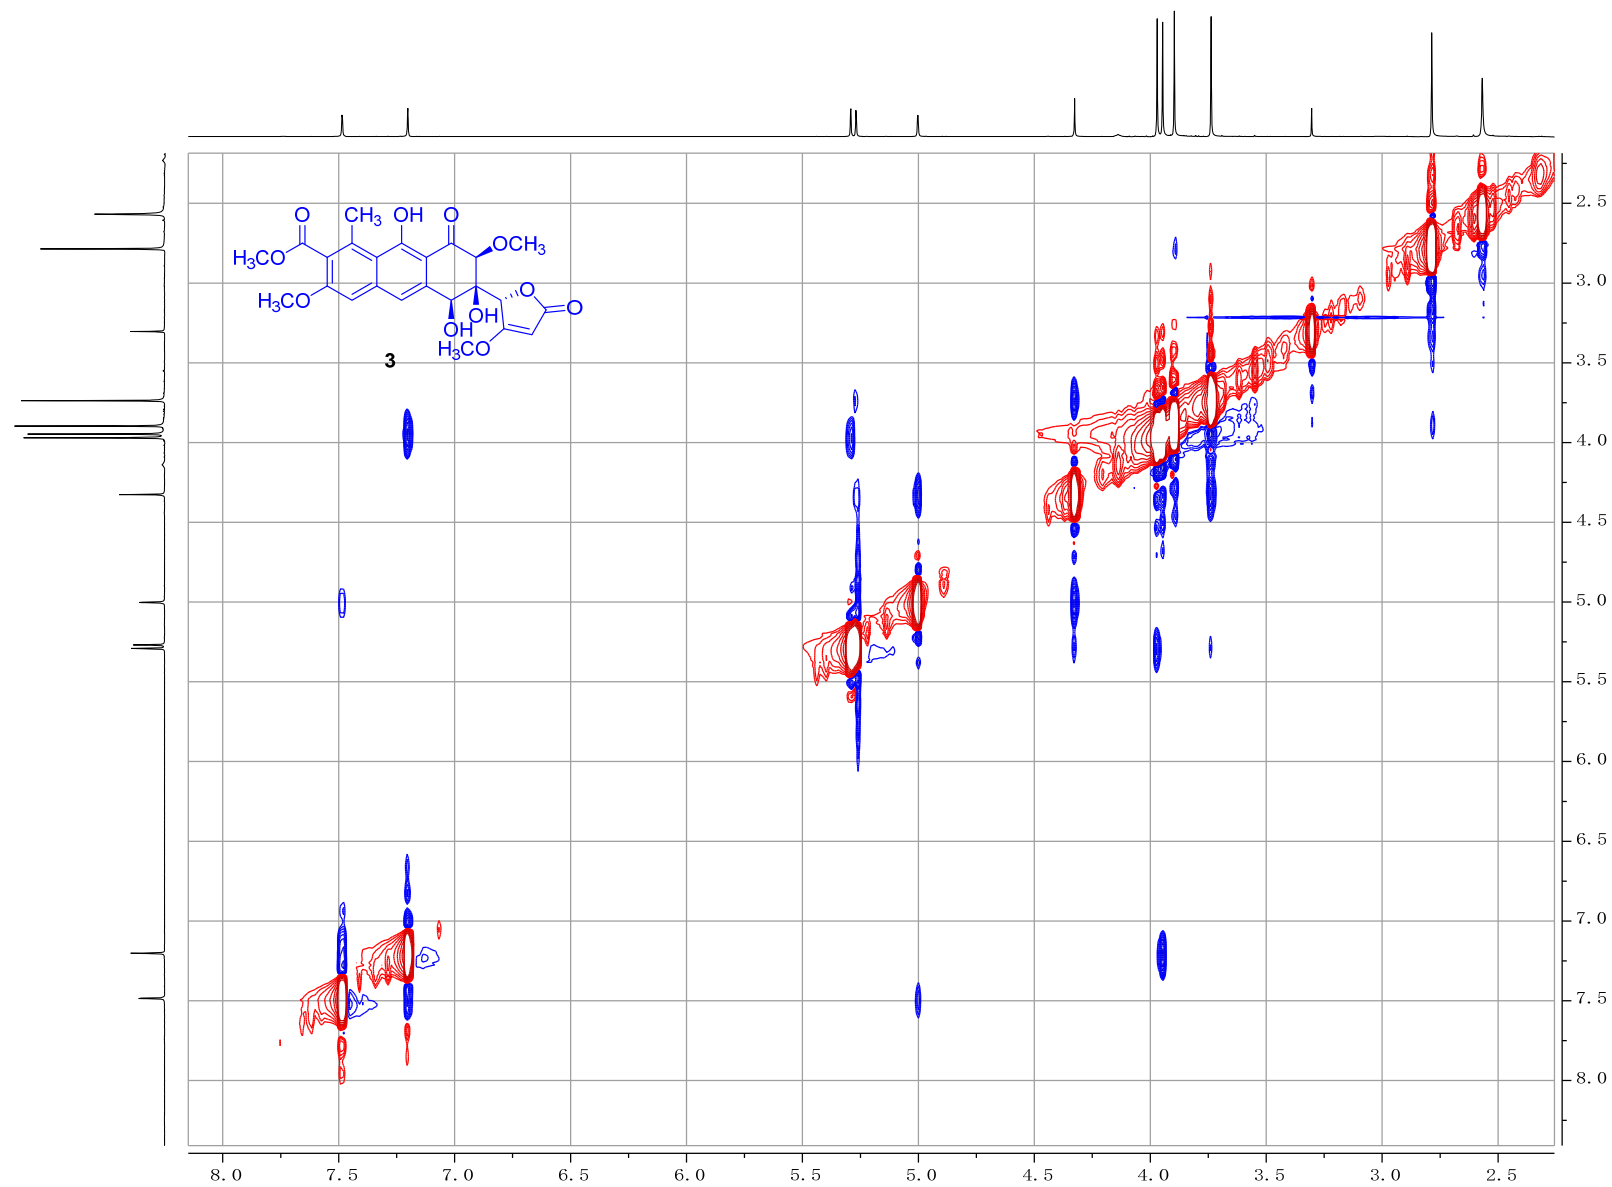

**Figure S24.** The ROESY spectrum of saccharothrixone G (**3**) in acetone-*d*<sub>6</sub> (600 MHz).

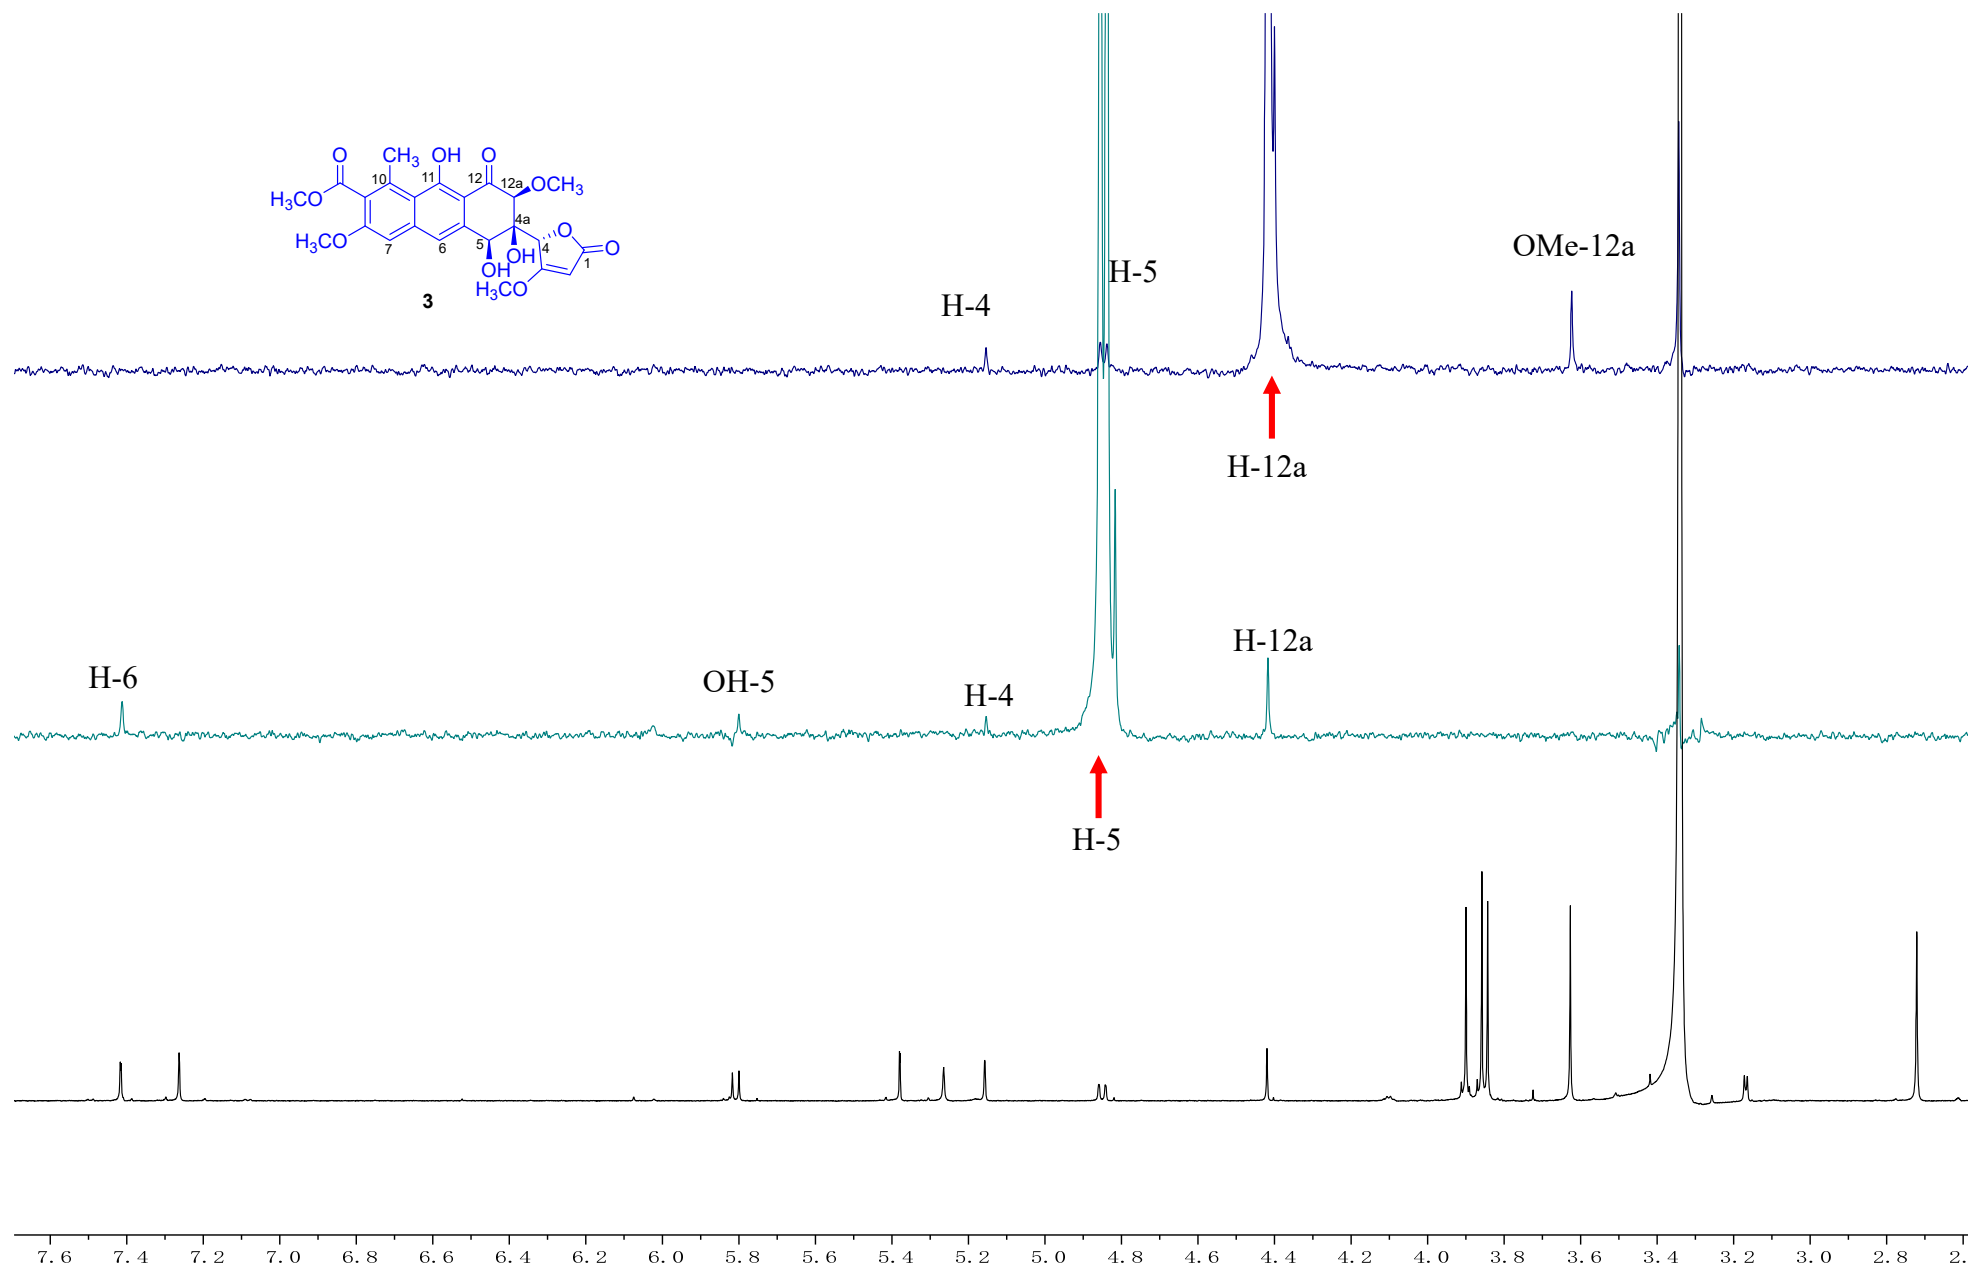

**Figure S25.** The 1D NOE spectrum of saccharothrixone G (**3**) in DMSO- $d_6$  (600 MHz).



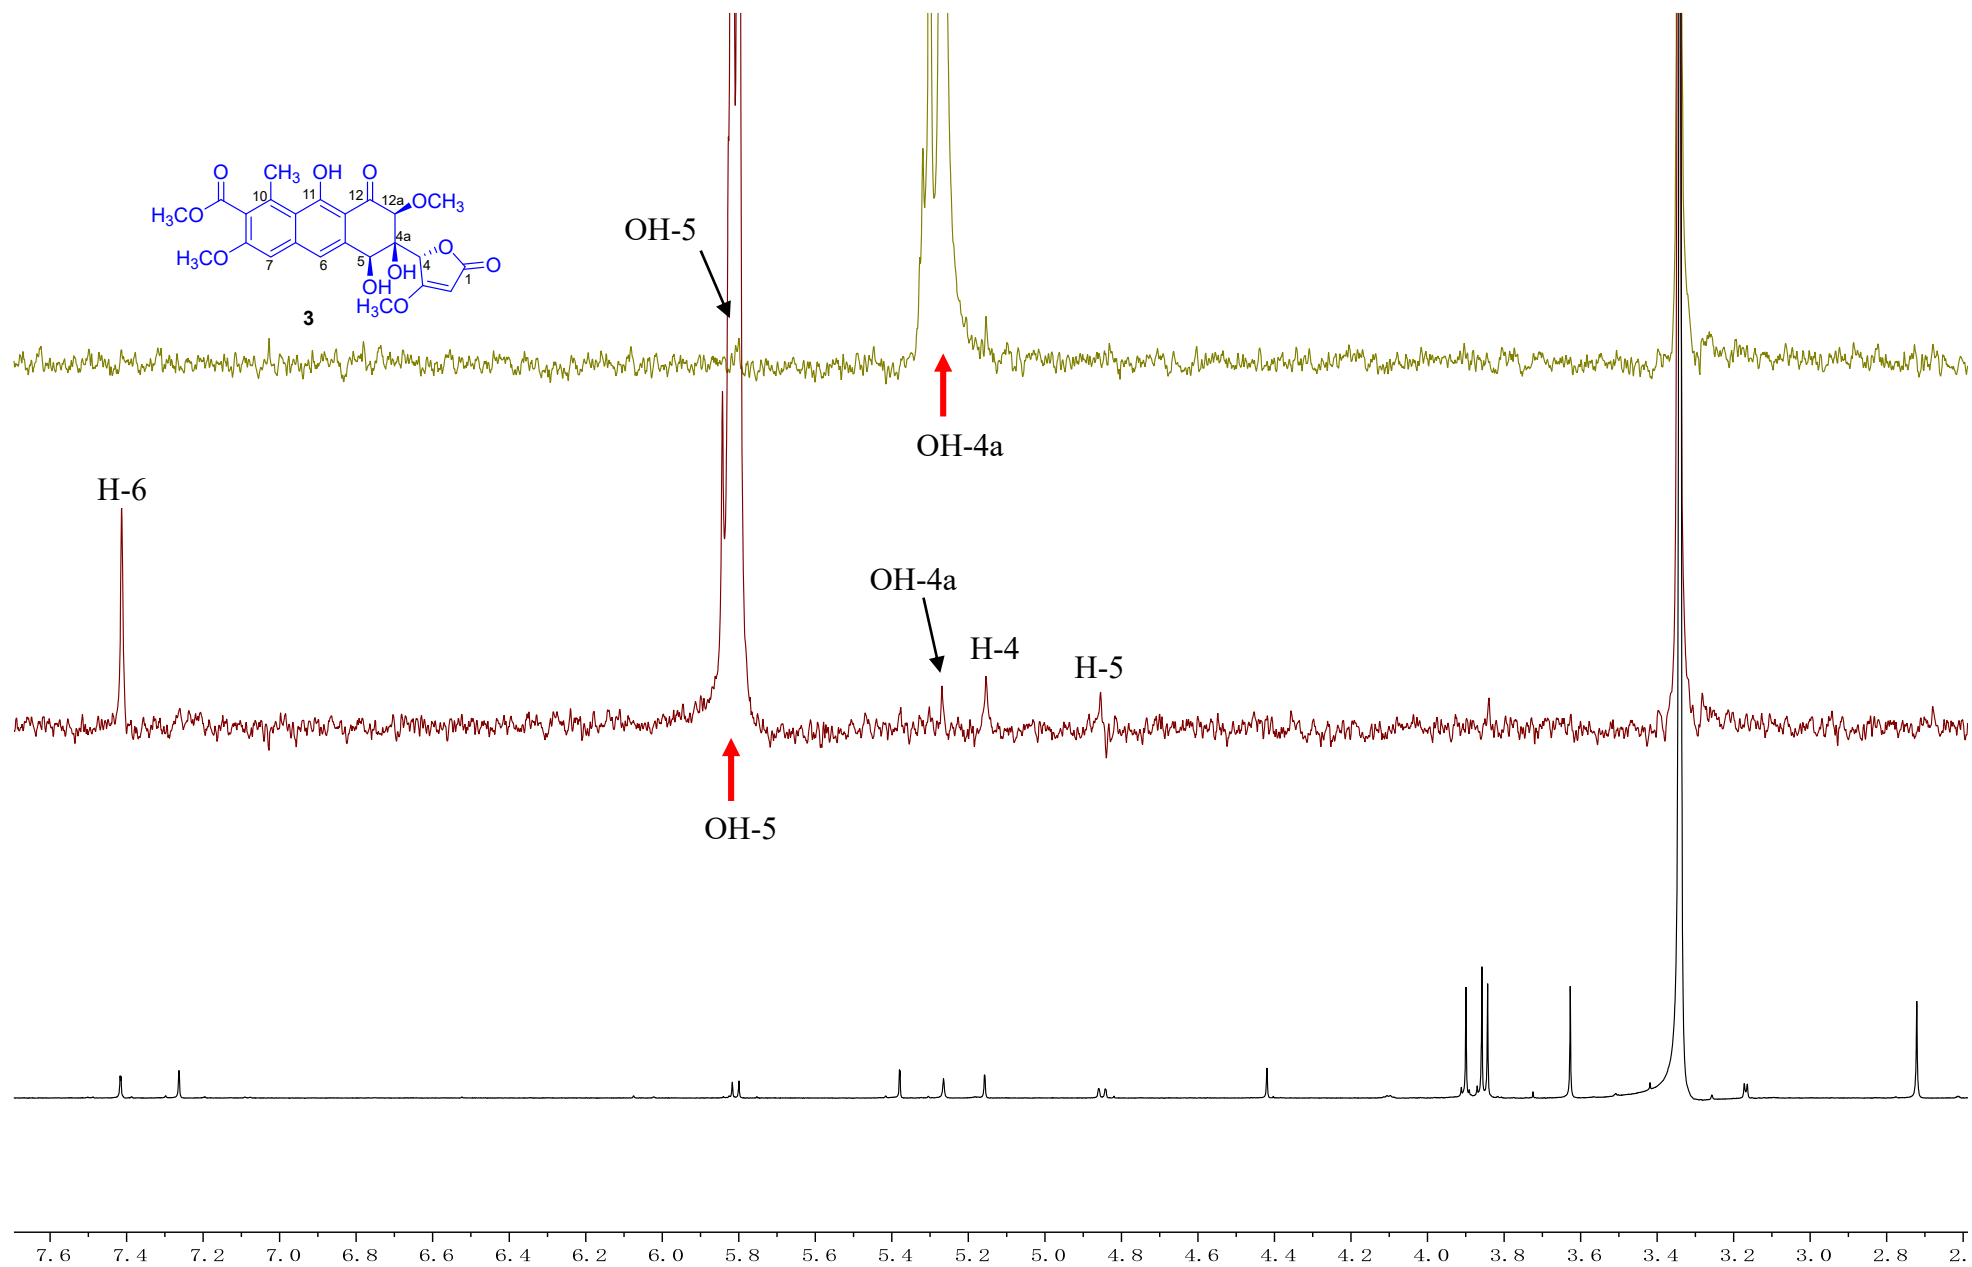

**Figure S26.** The 1D NOE spectrum of saccharothrixone G (**3**) in DMSO-d<sub>6</sub> (600 MHz).

marine-20-12\_-#52 RT: 1.16 AV: 1 NL: 1.73E5  
T: FTMS - c ESI Full ms [300.00-1000.00]

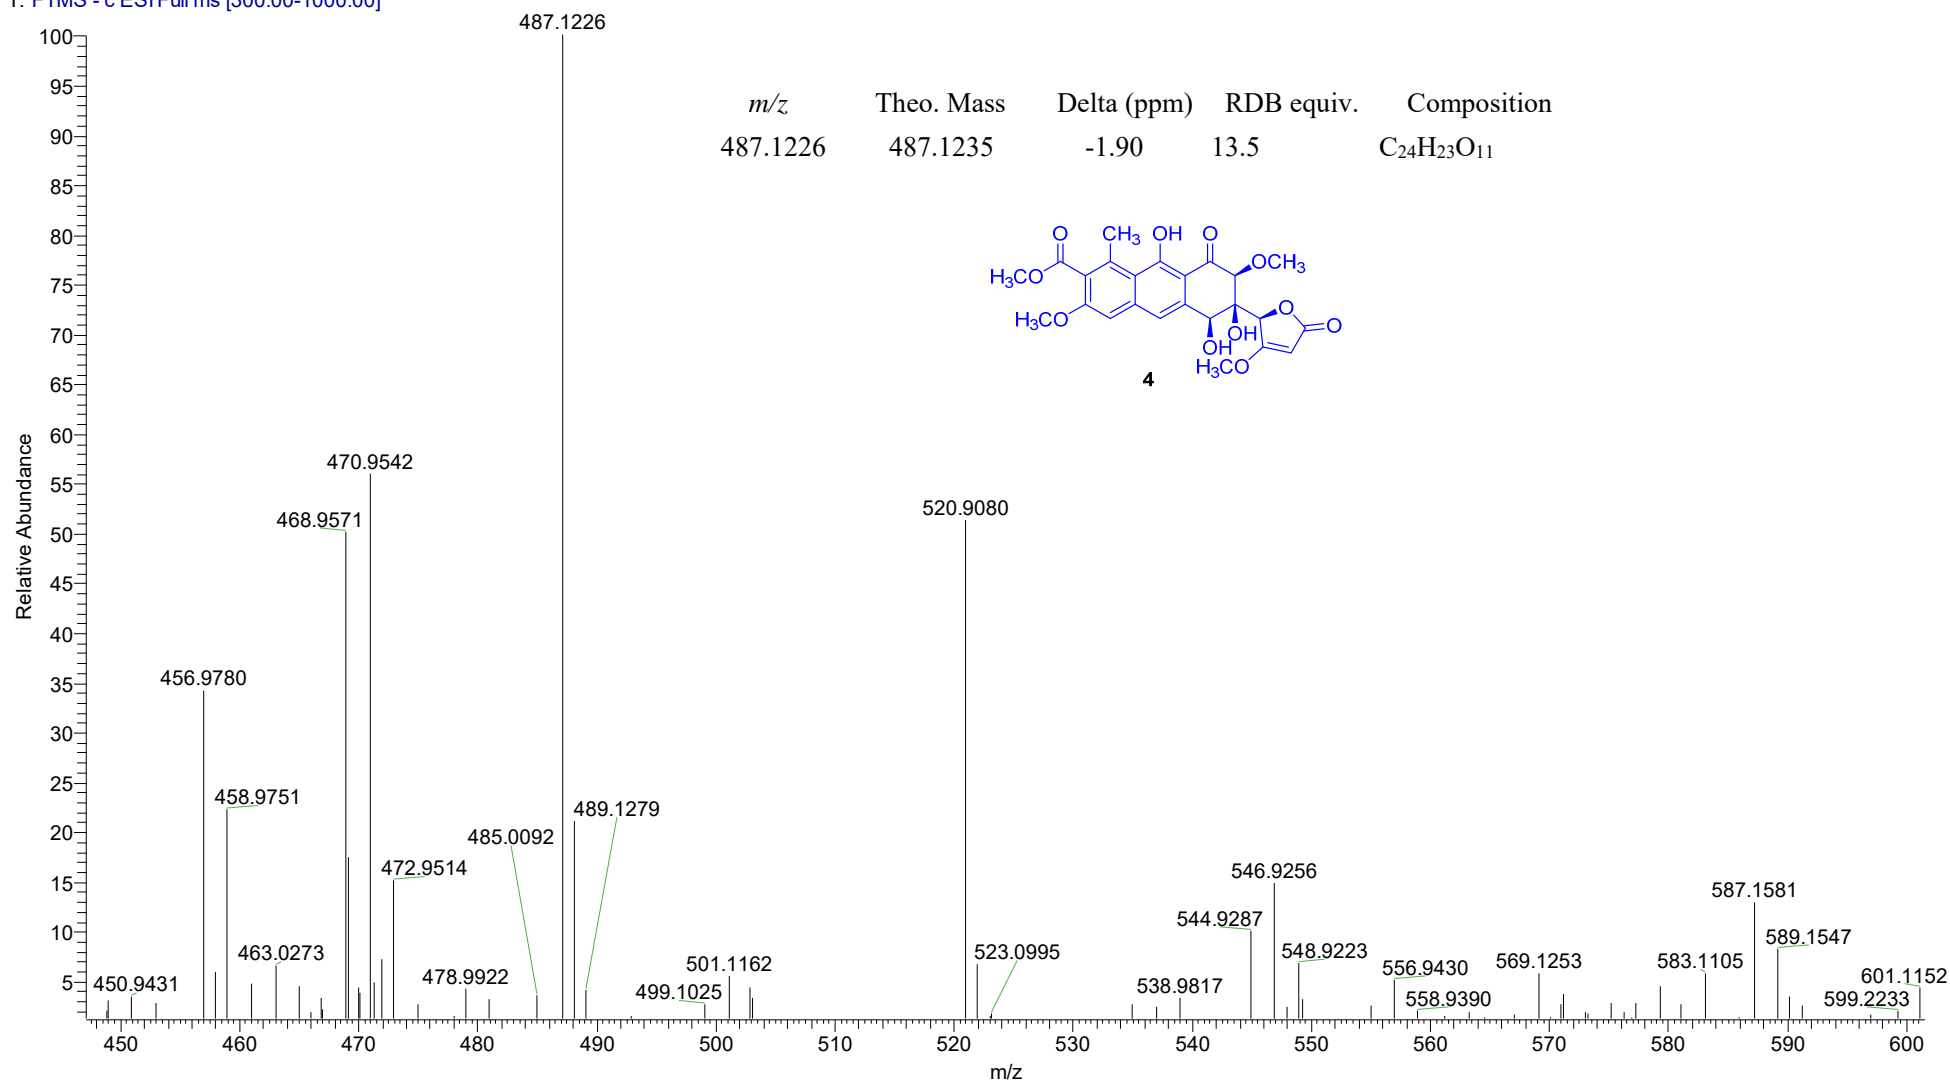

Figure S27. The (–)-HRESIMS spectrum of saccharothrixone H (4).

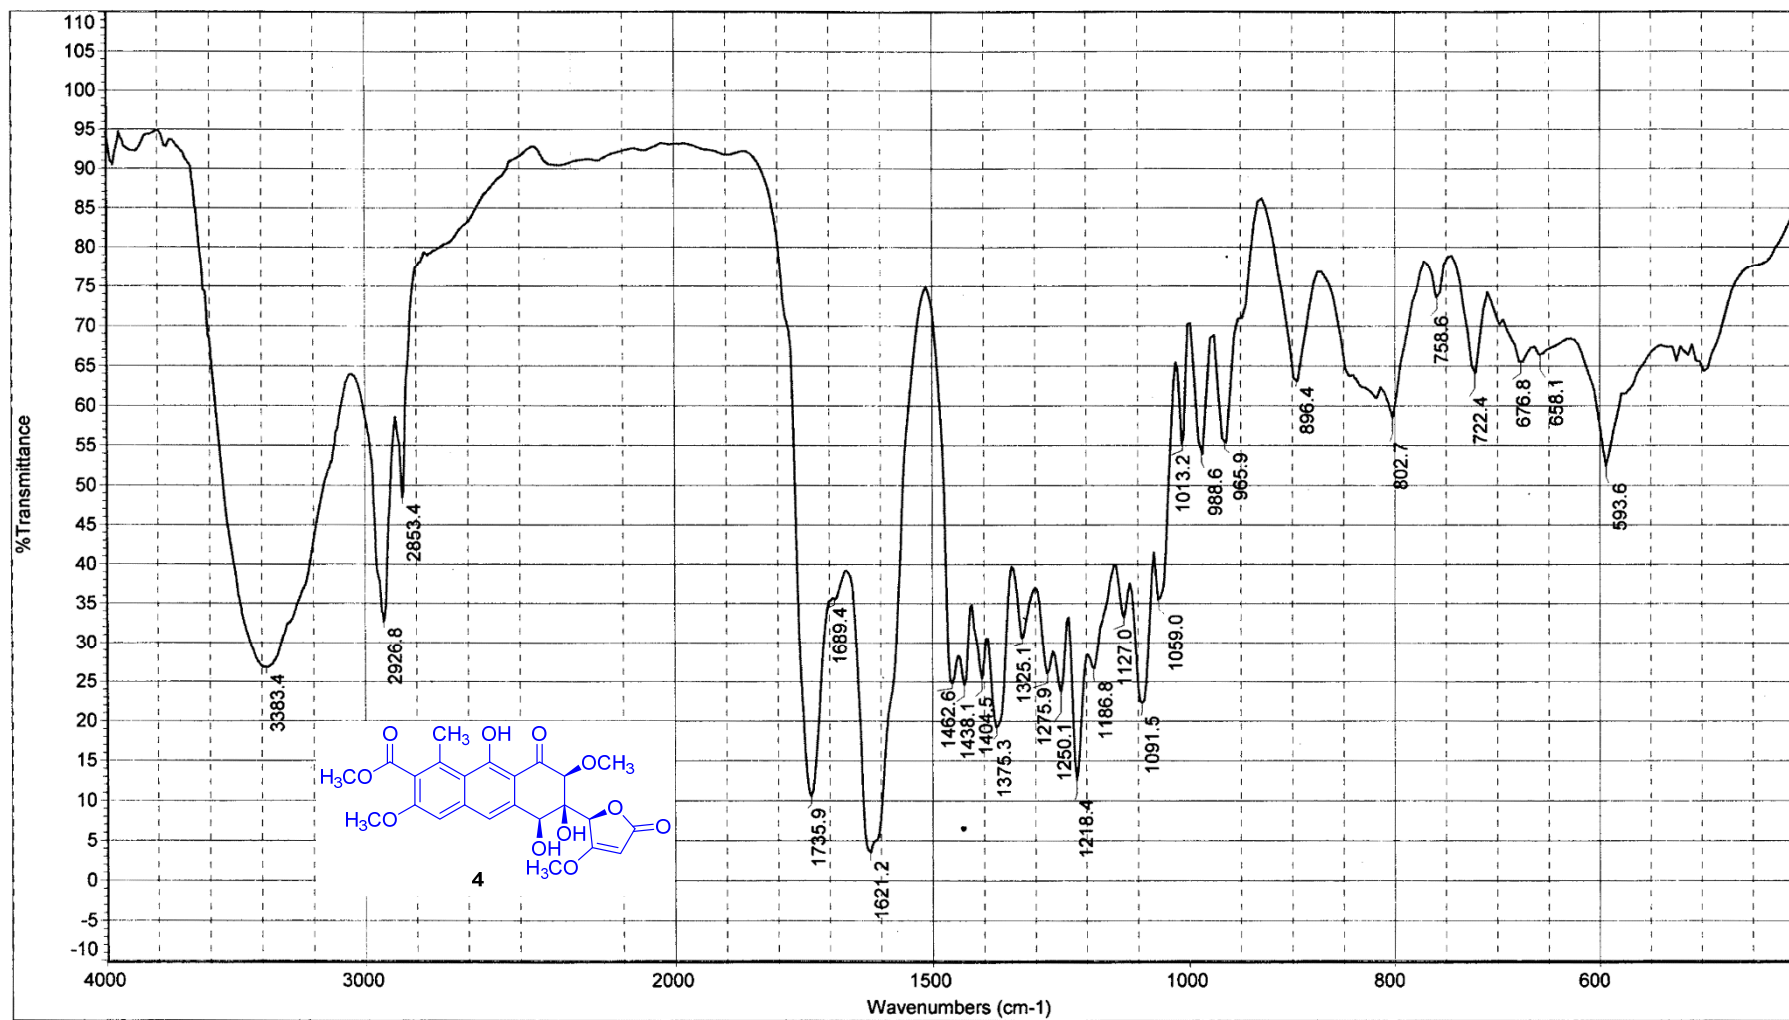

**Figure S28.** The IR spectrum of saccharothrixone H (4).

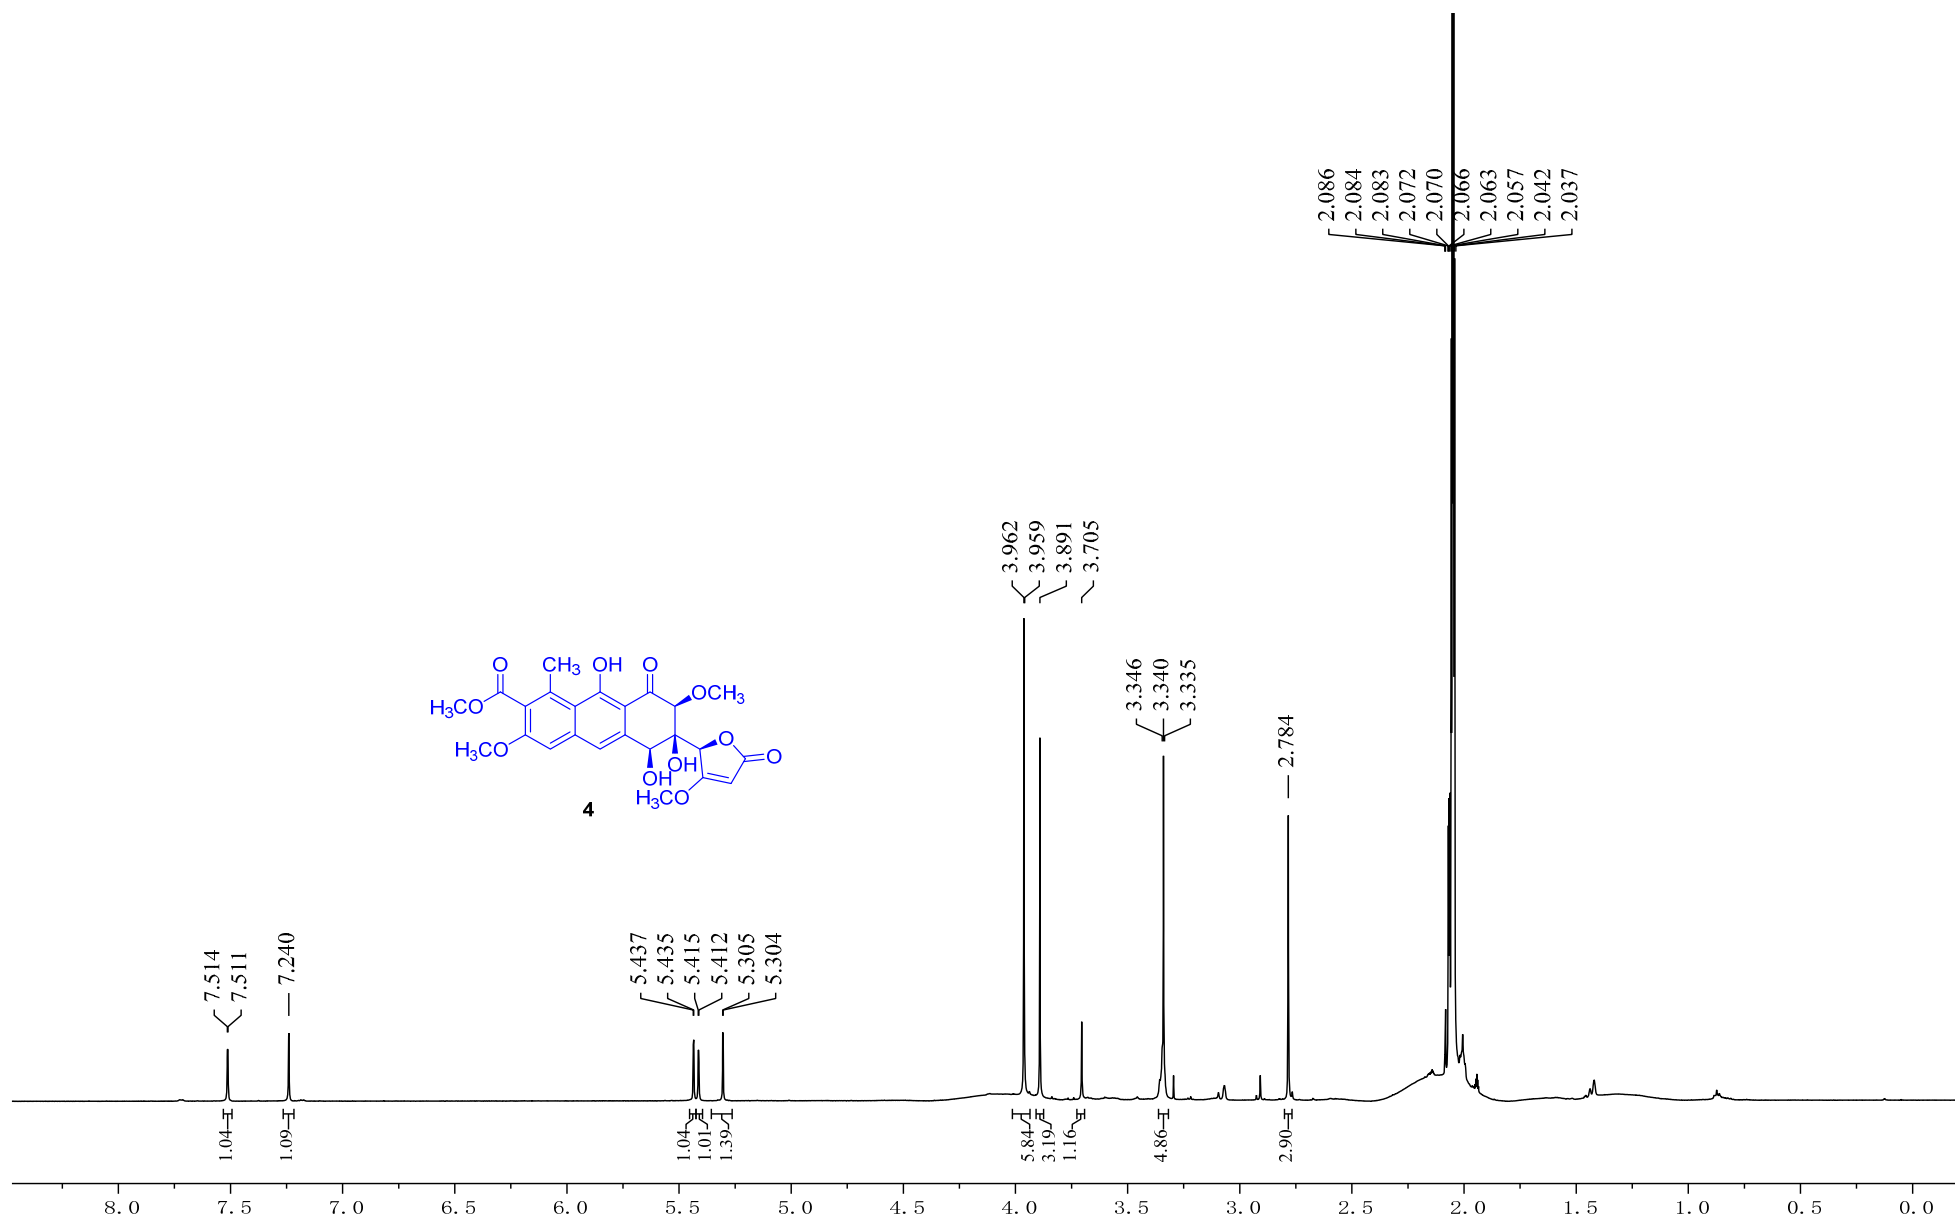

**Figure S29.** The  $^1\text{H}$  NMR spectrum of saccharothrixone H (**4**) in acetone- $d_6$  (600 MHz).

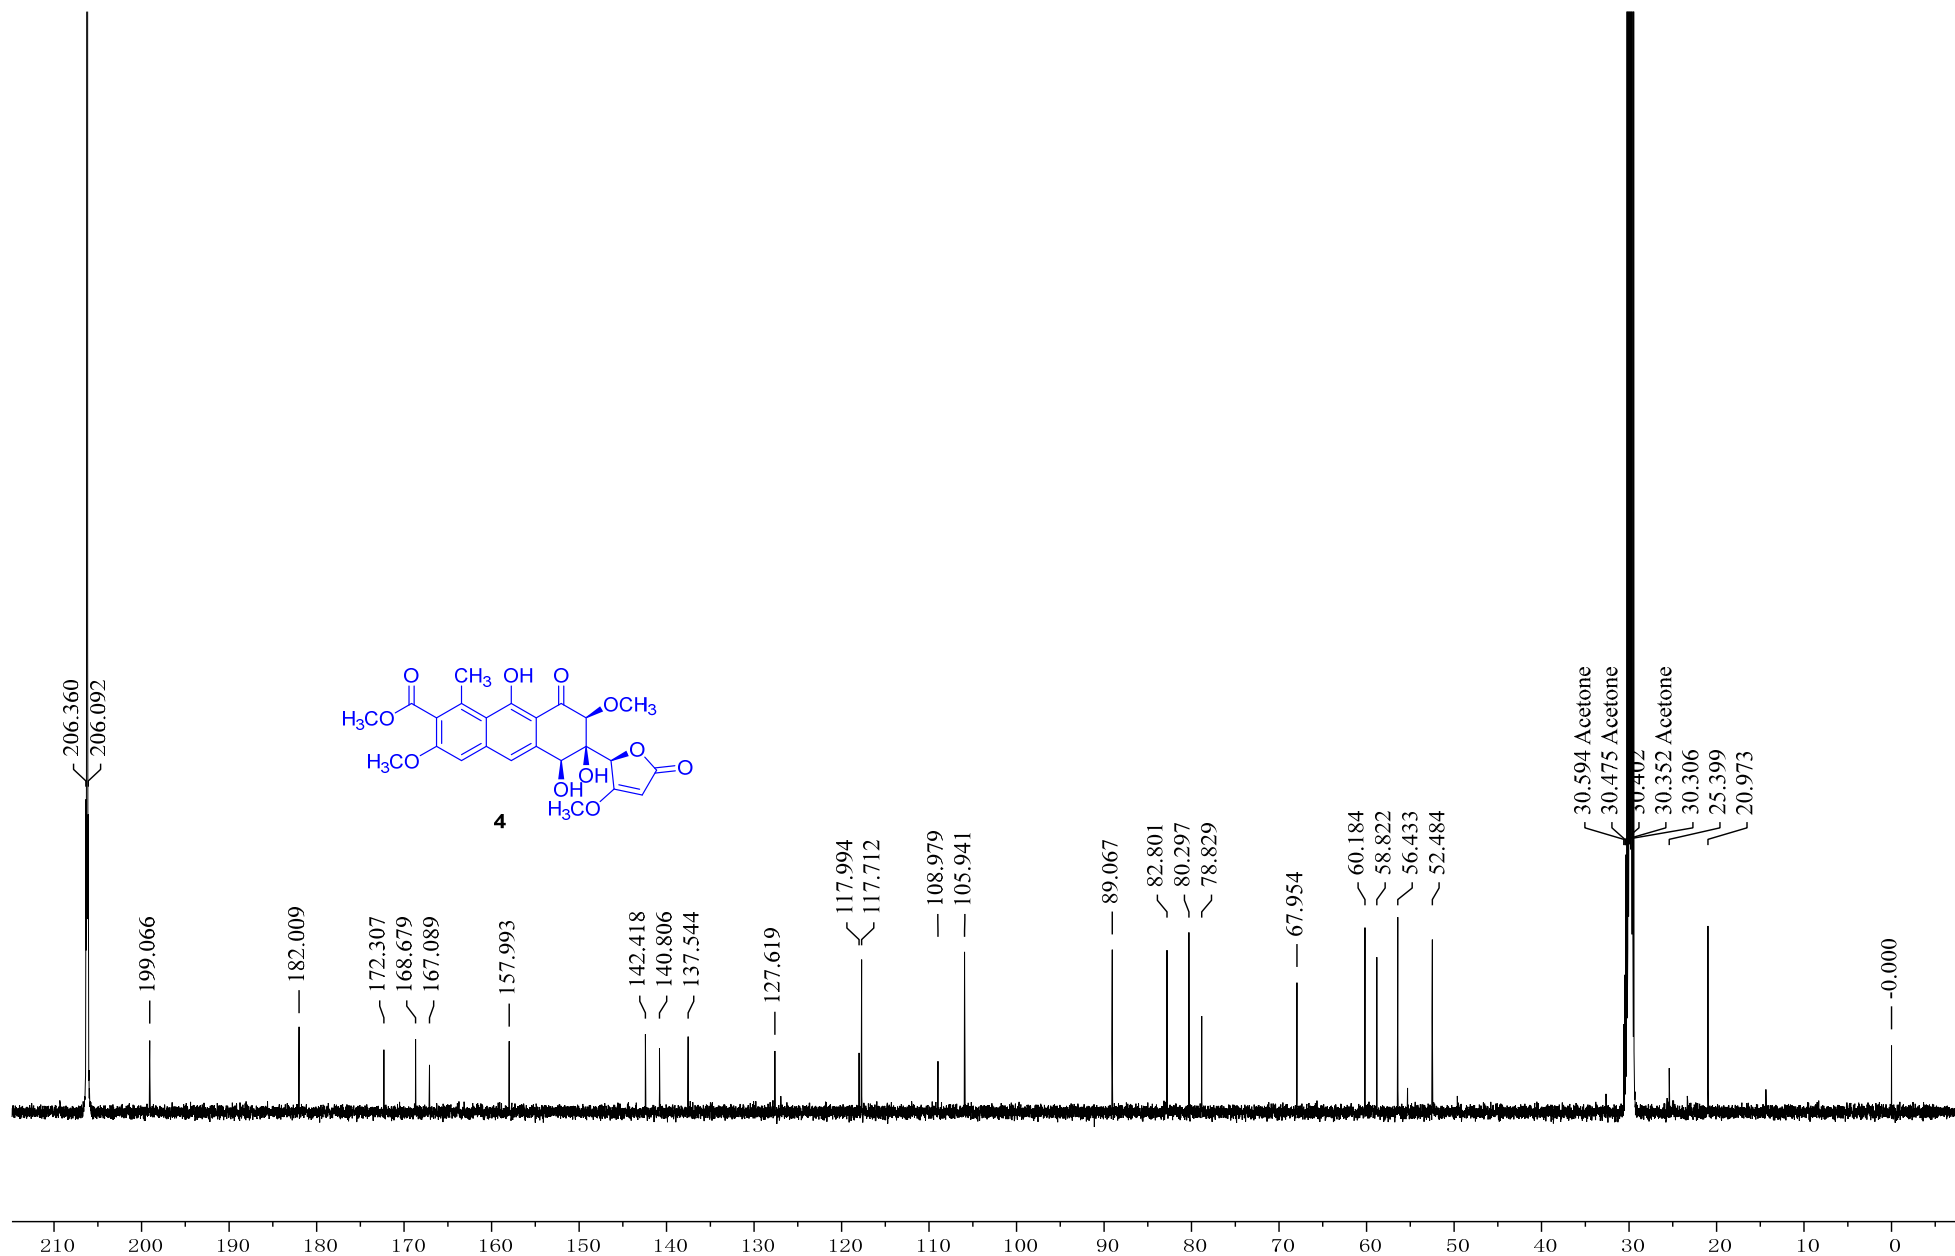

**Figure S30.** The  $^{13}\text{C}$  NMR spectrum of saccharothrixone H (**4**) in acetone- $d_6$  (150 MHz).

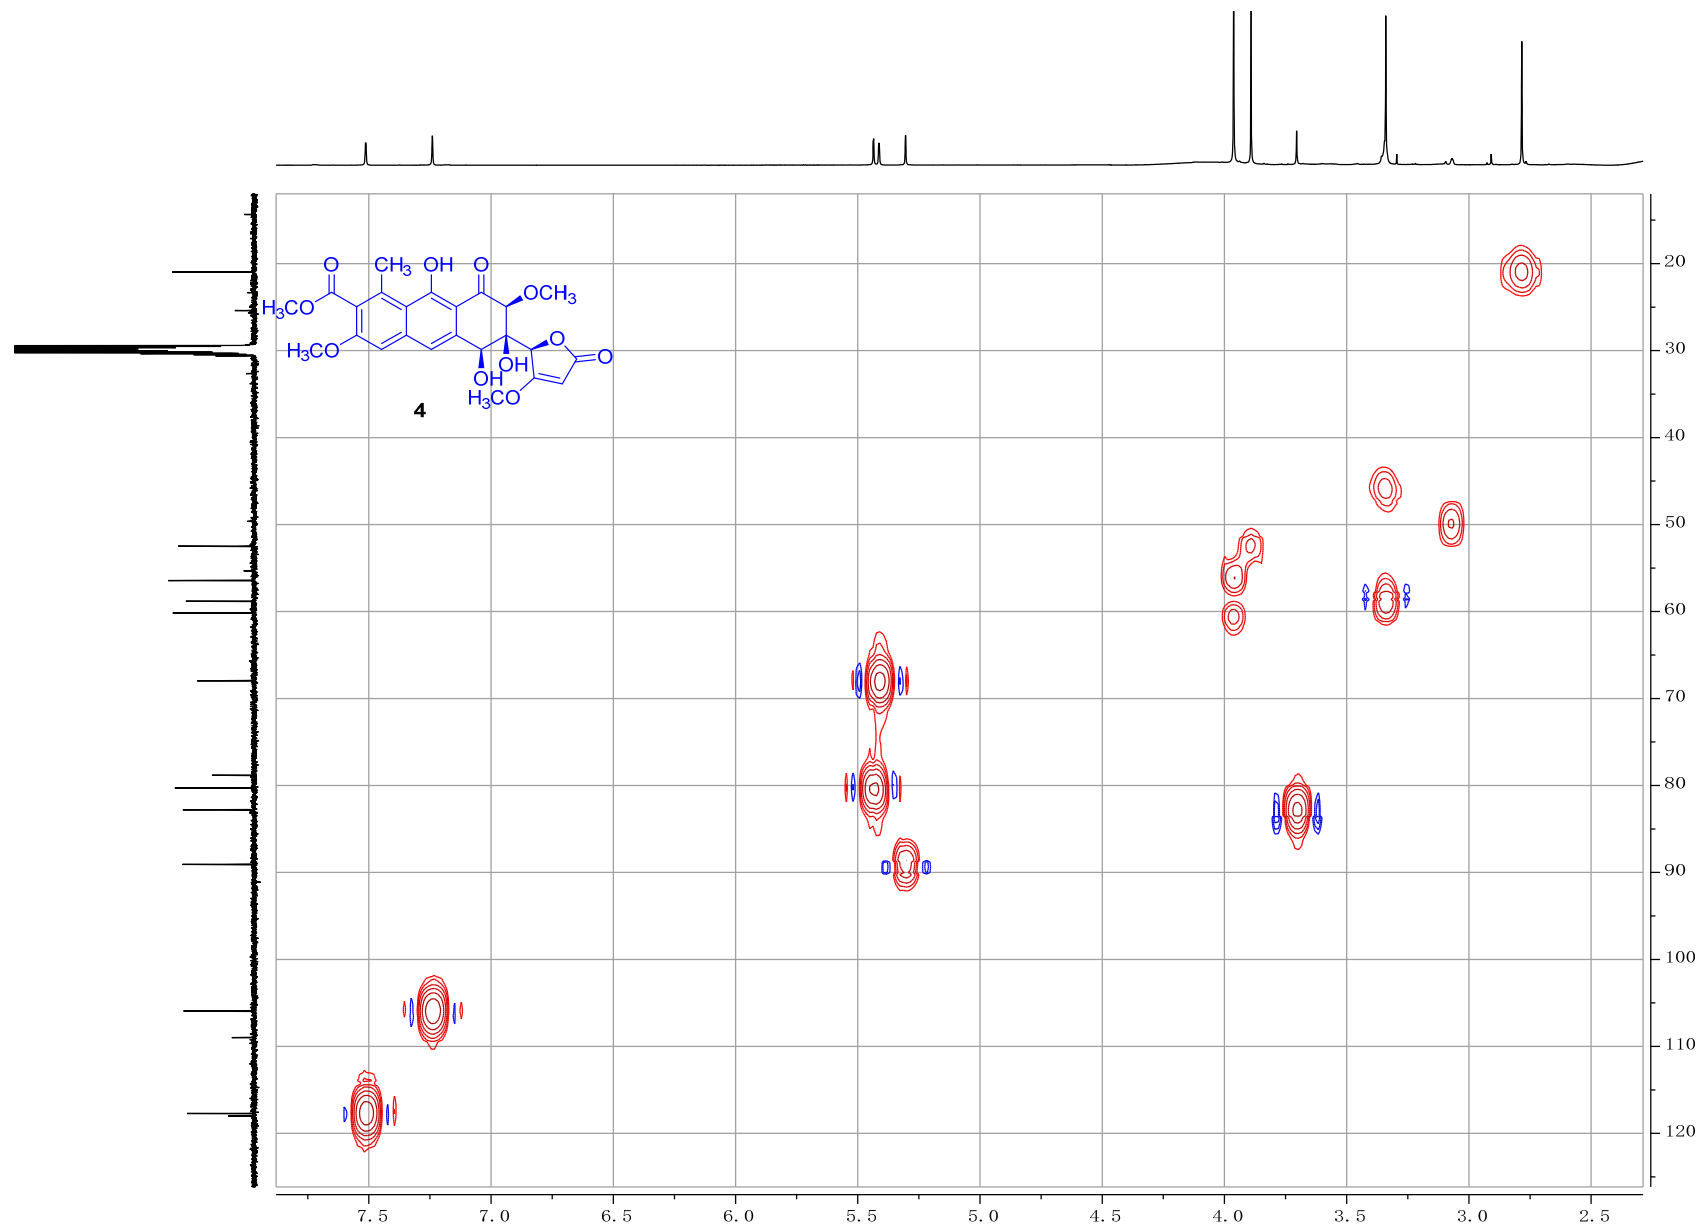

**Figure S31.** The HSQC spectrum of saccharothrixone H (**4**) in acetone- $d_6$  (600 MHz).

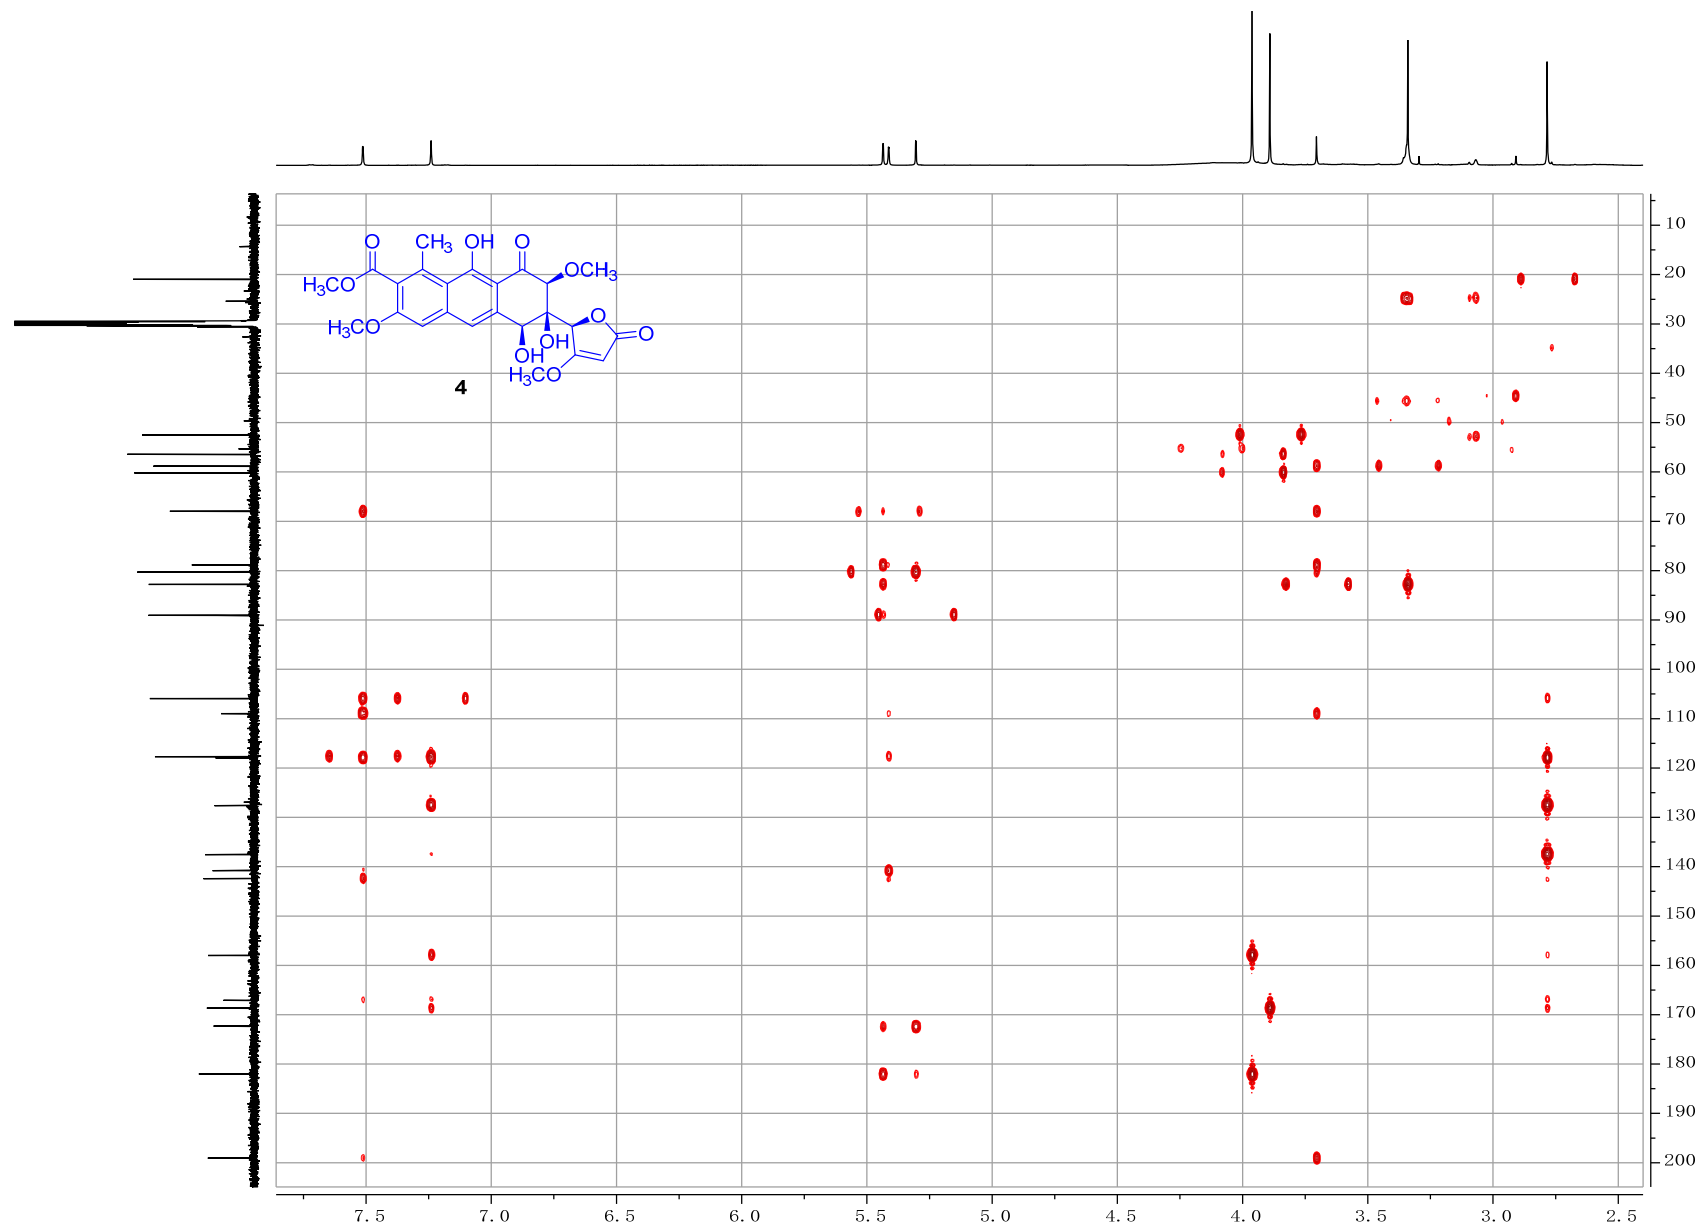

**Figure S32.** The HMBC spectrum of saccharothrixone H (4) in acetone- $d_6$  (600 MHz).

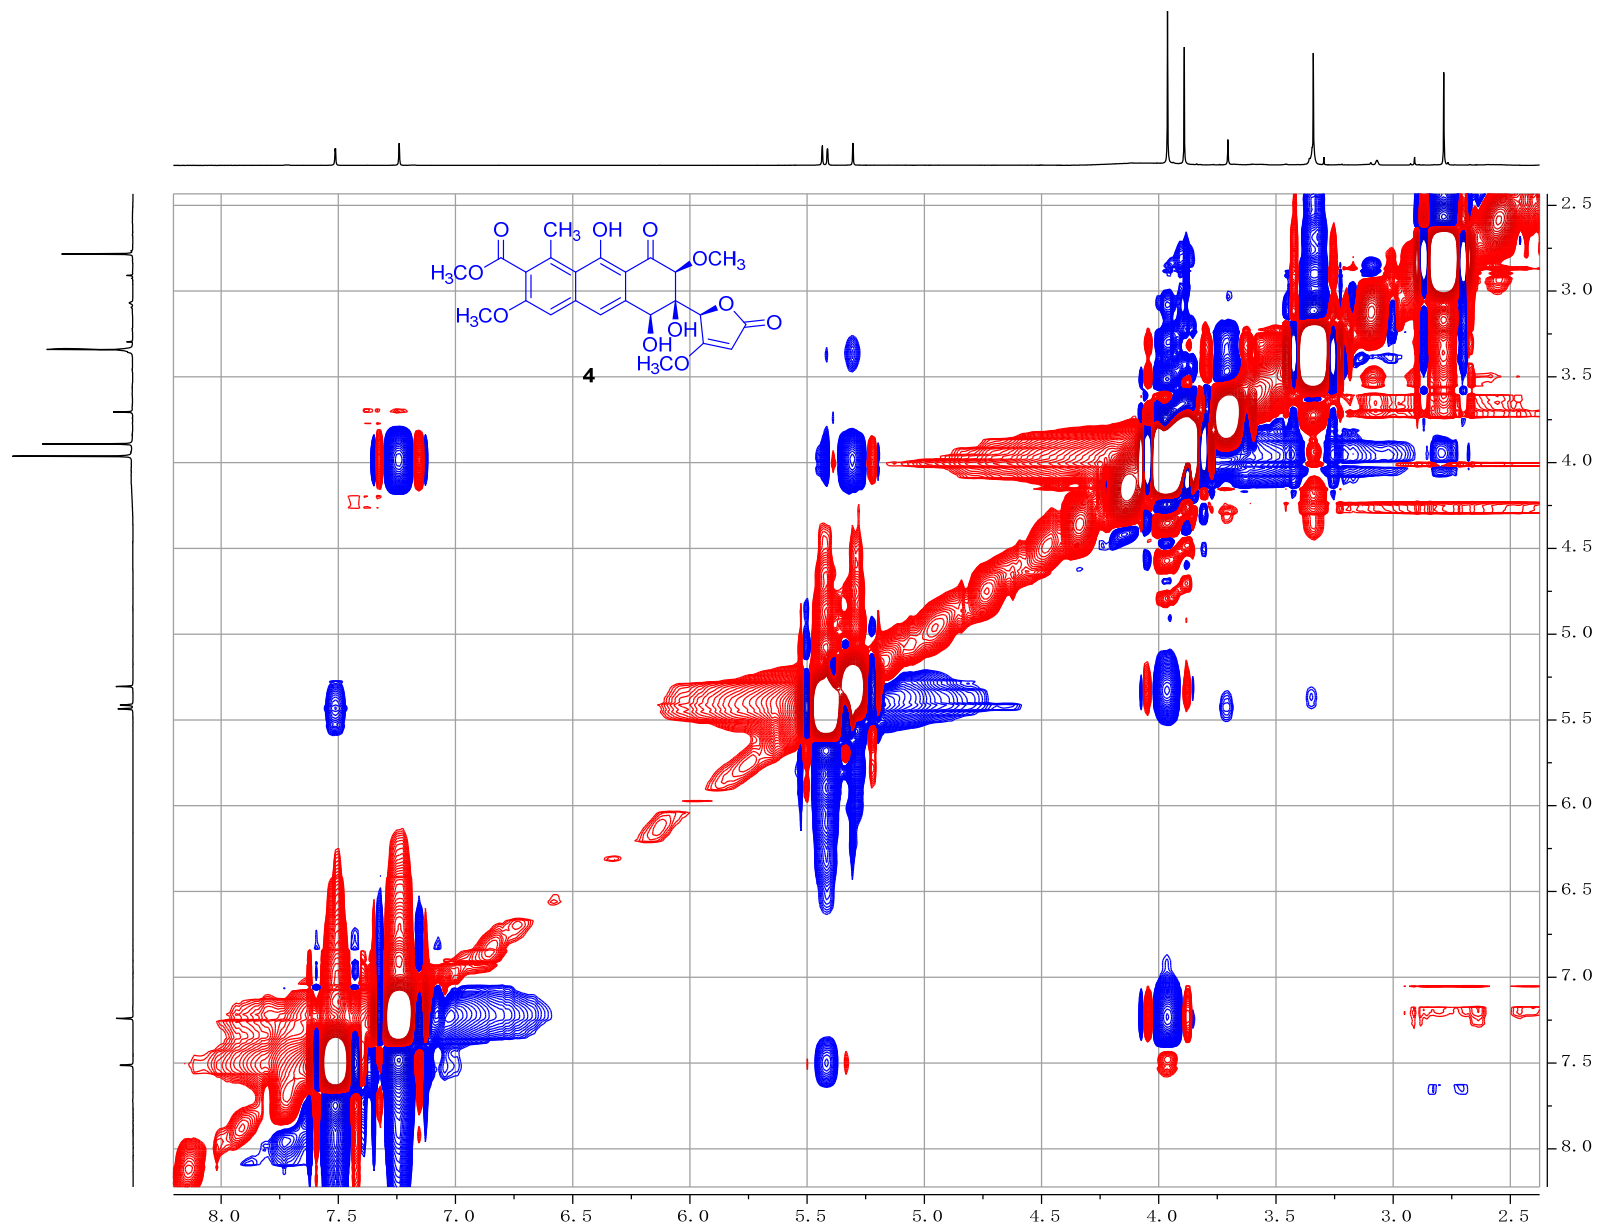

**Figure S33.** The ROESY spectrum of saccharothrixone H (**4**) in acetone-*d*<sub>6</sub> (600 MHz).



marine-20-11\_HRESI#27 RT: 1.01 AV: 1 NL: 1.12E5  
T: FTMS - c ESI Full ms [450.00-550.00]

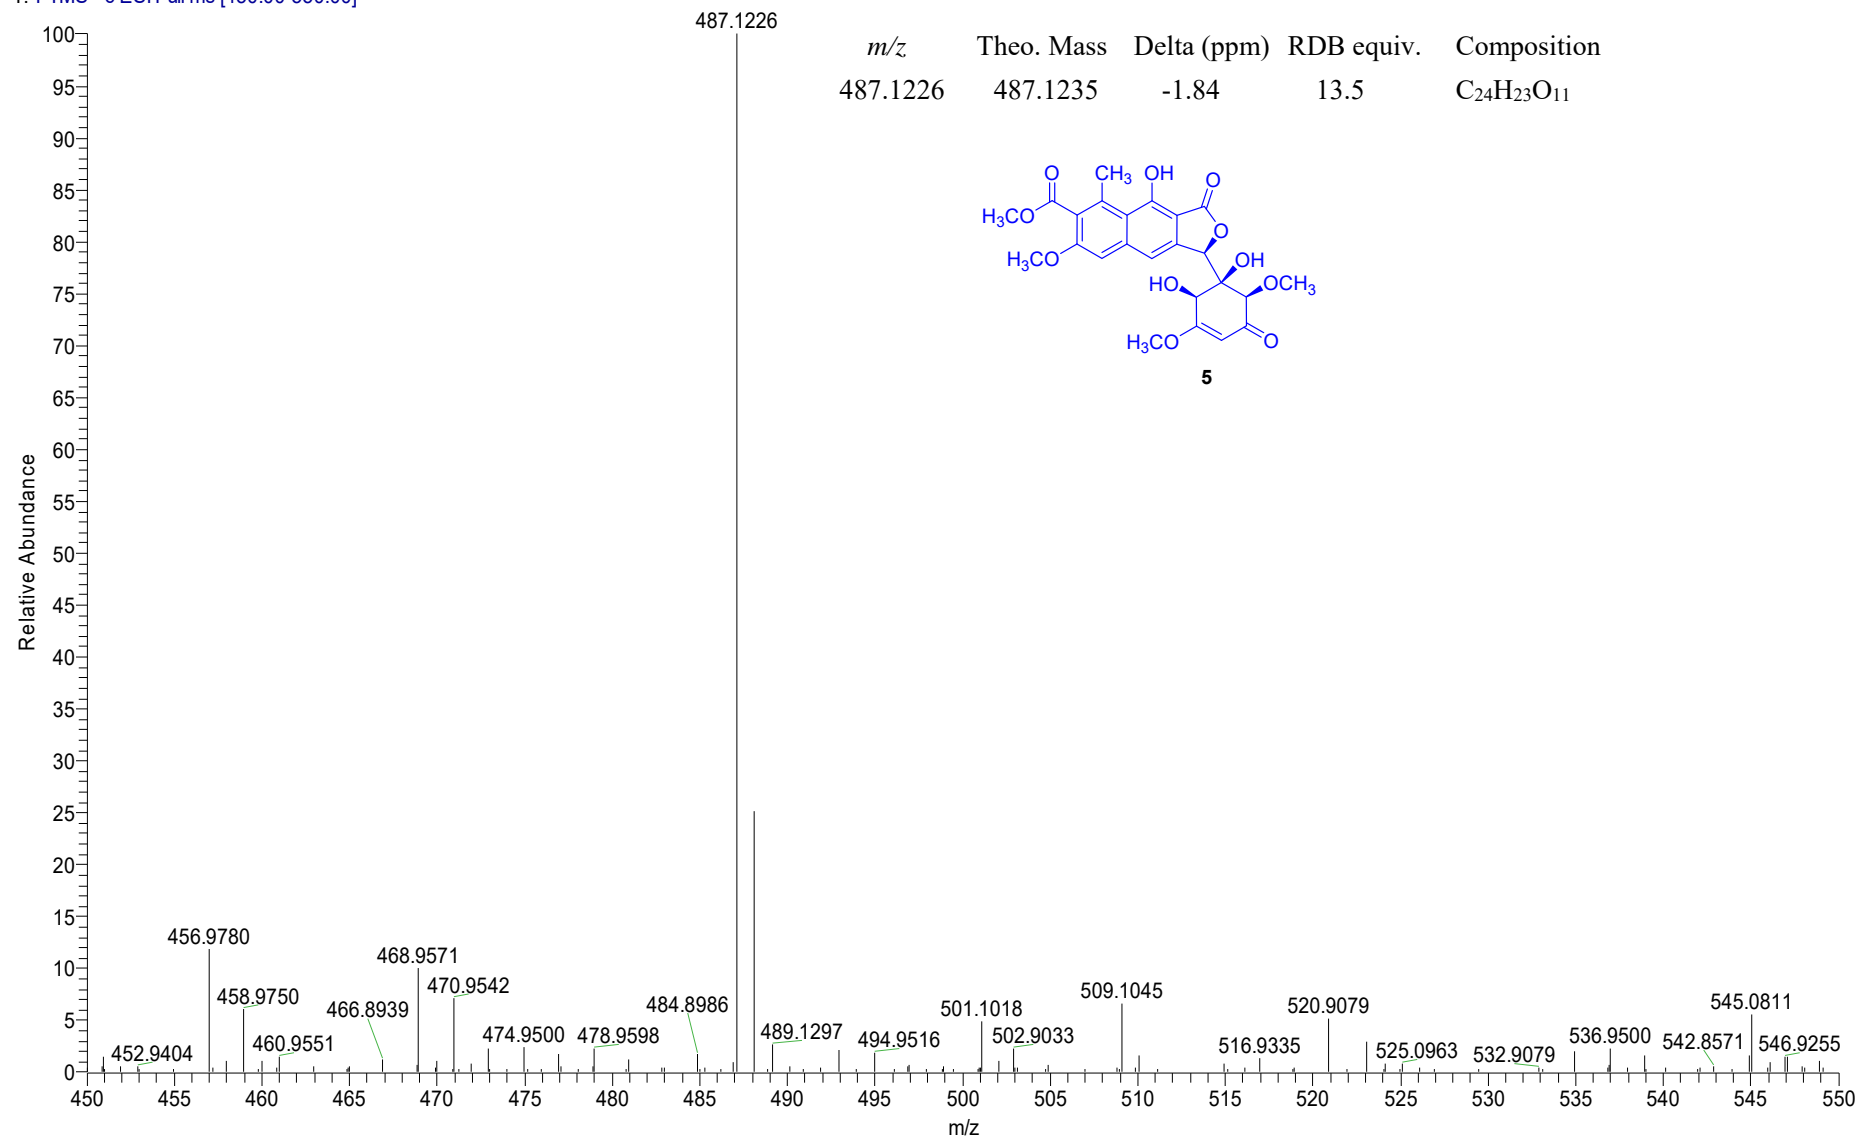

**Figure S34.** The (–)-HRESIMS spectrum of saccharothrixone I (**5**).

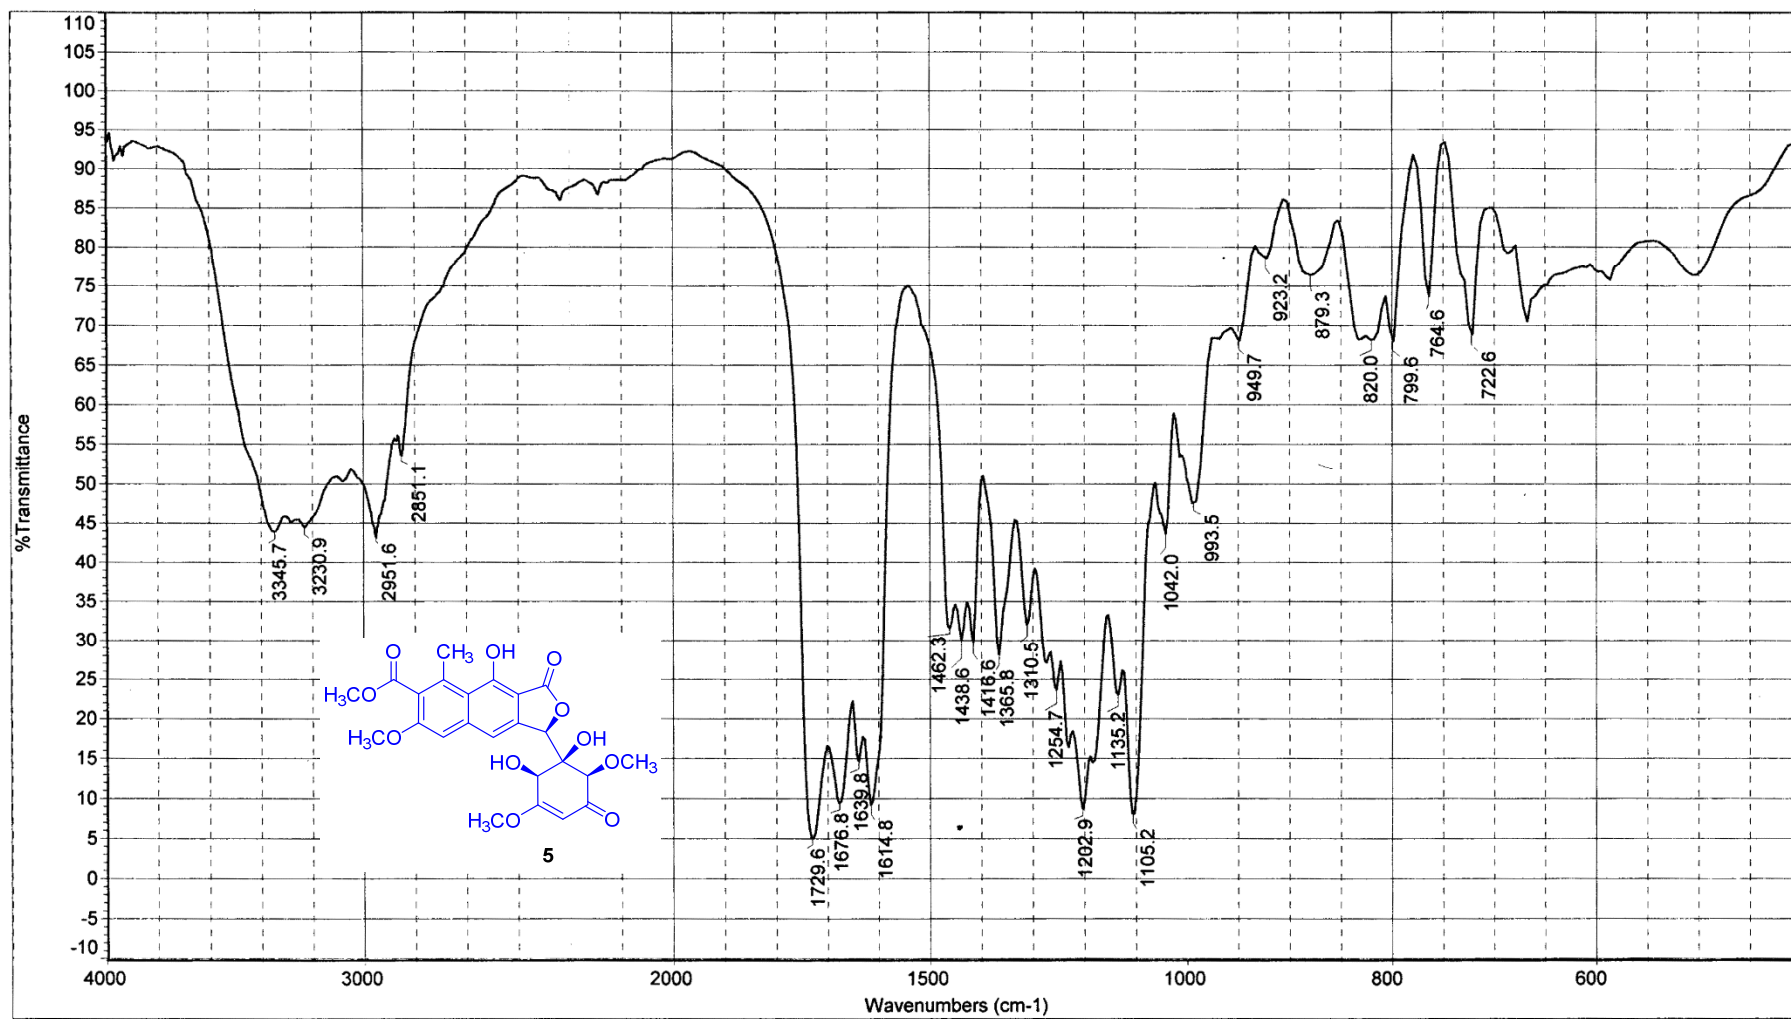

**Figure S35.** The IR spectrum of saccharothrixone I (5).

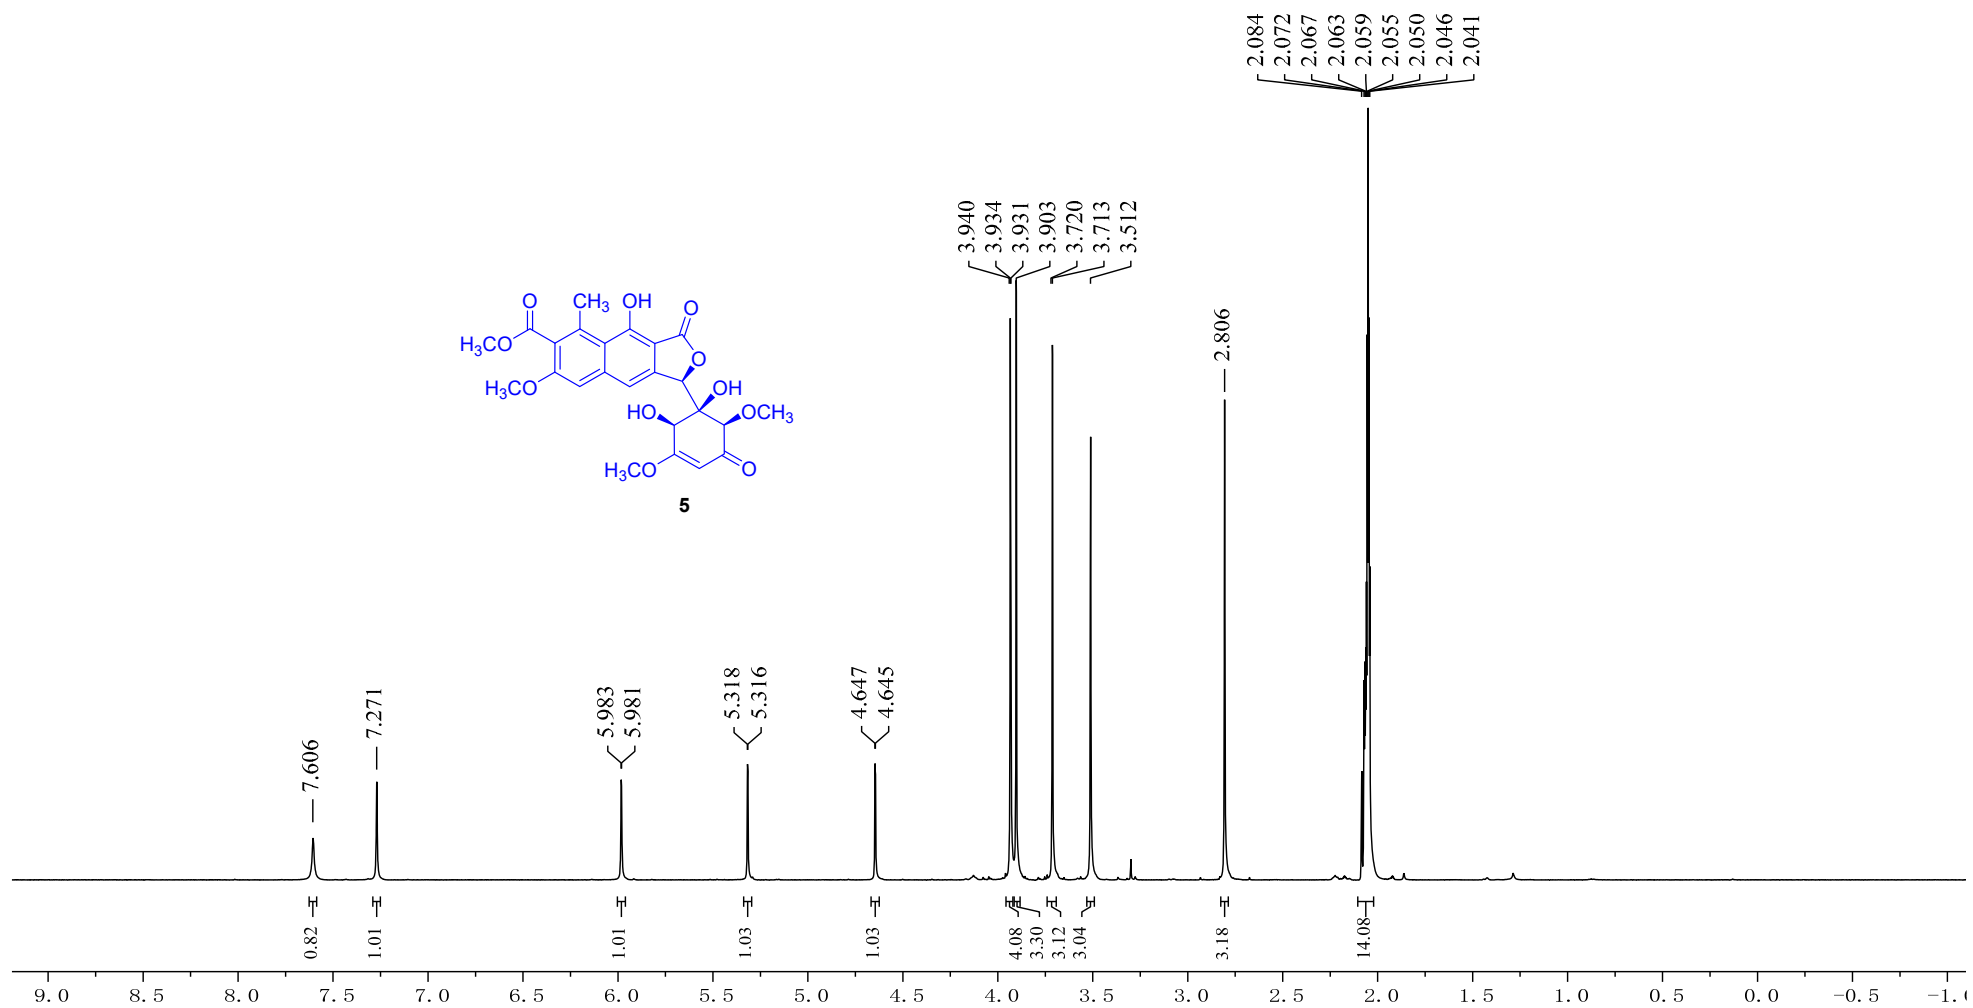

**Figure S36.** The  $^1\text{H}$  NMR spectrum of saccharothrixone I (**5**) in acetone- $d_6$  (500 MHz).

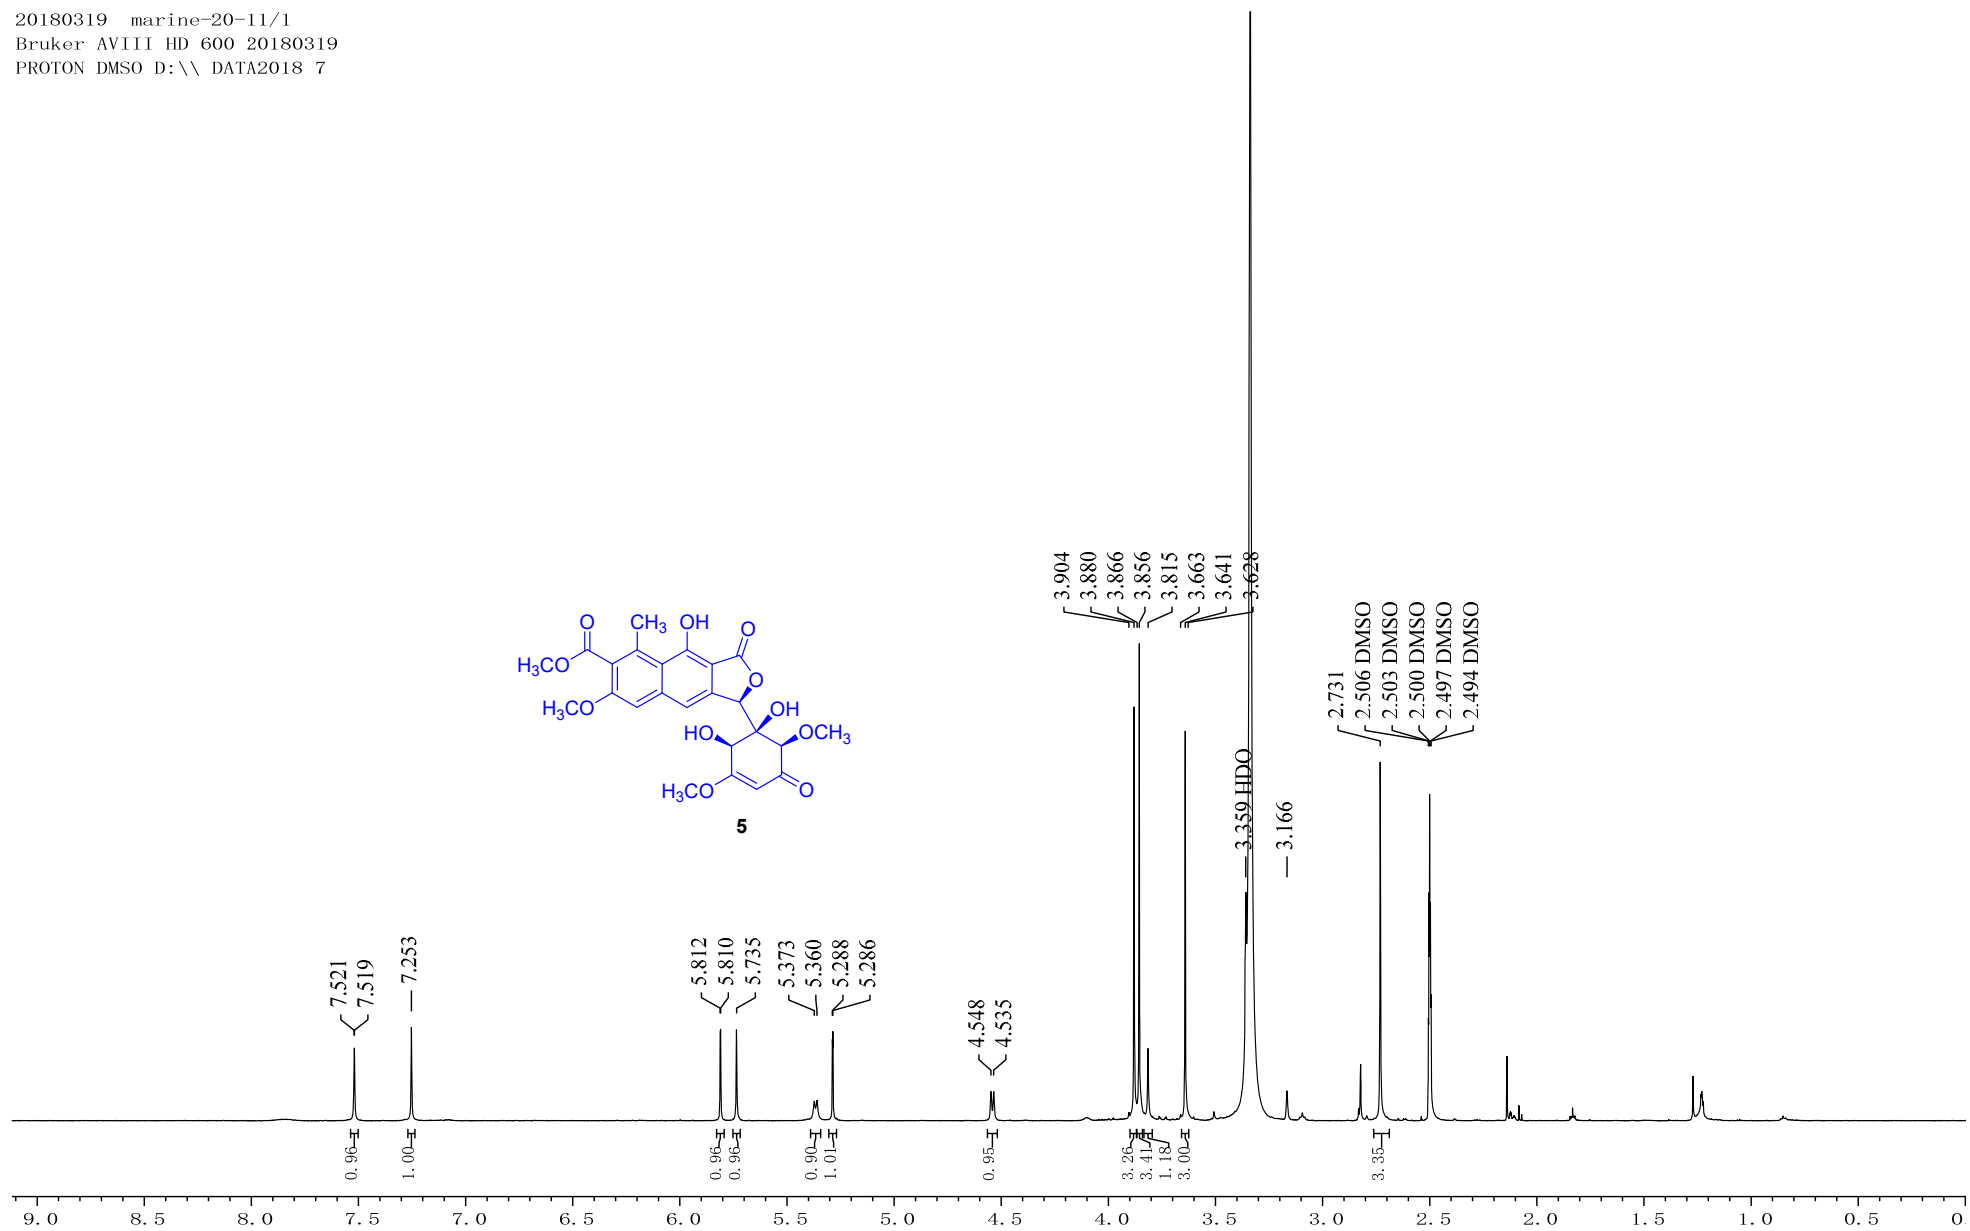

**Figure S37.** The <sup>1</sup>H NMR spectrum of saccharothrixone I (**5**) in DMSO-d<sub>6</sub> (600 MHz).

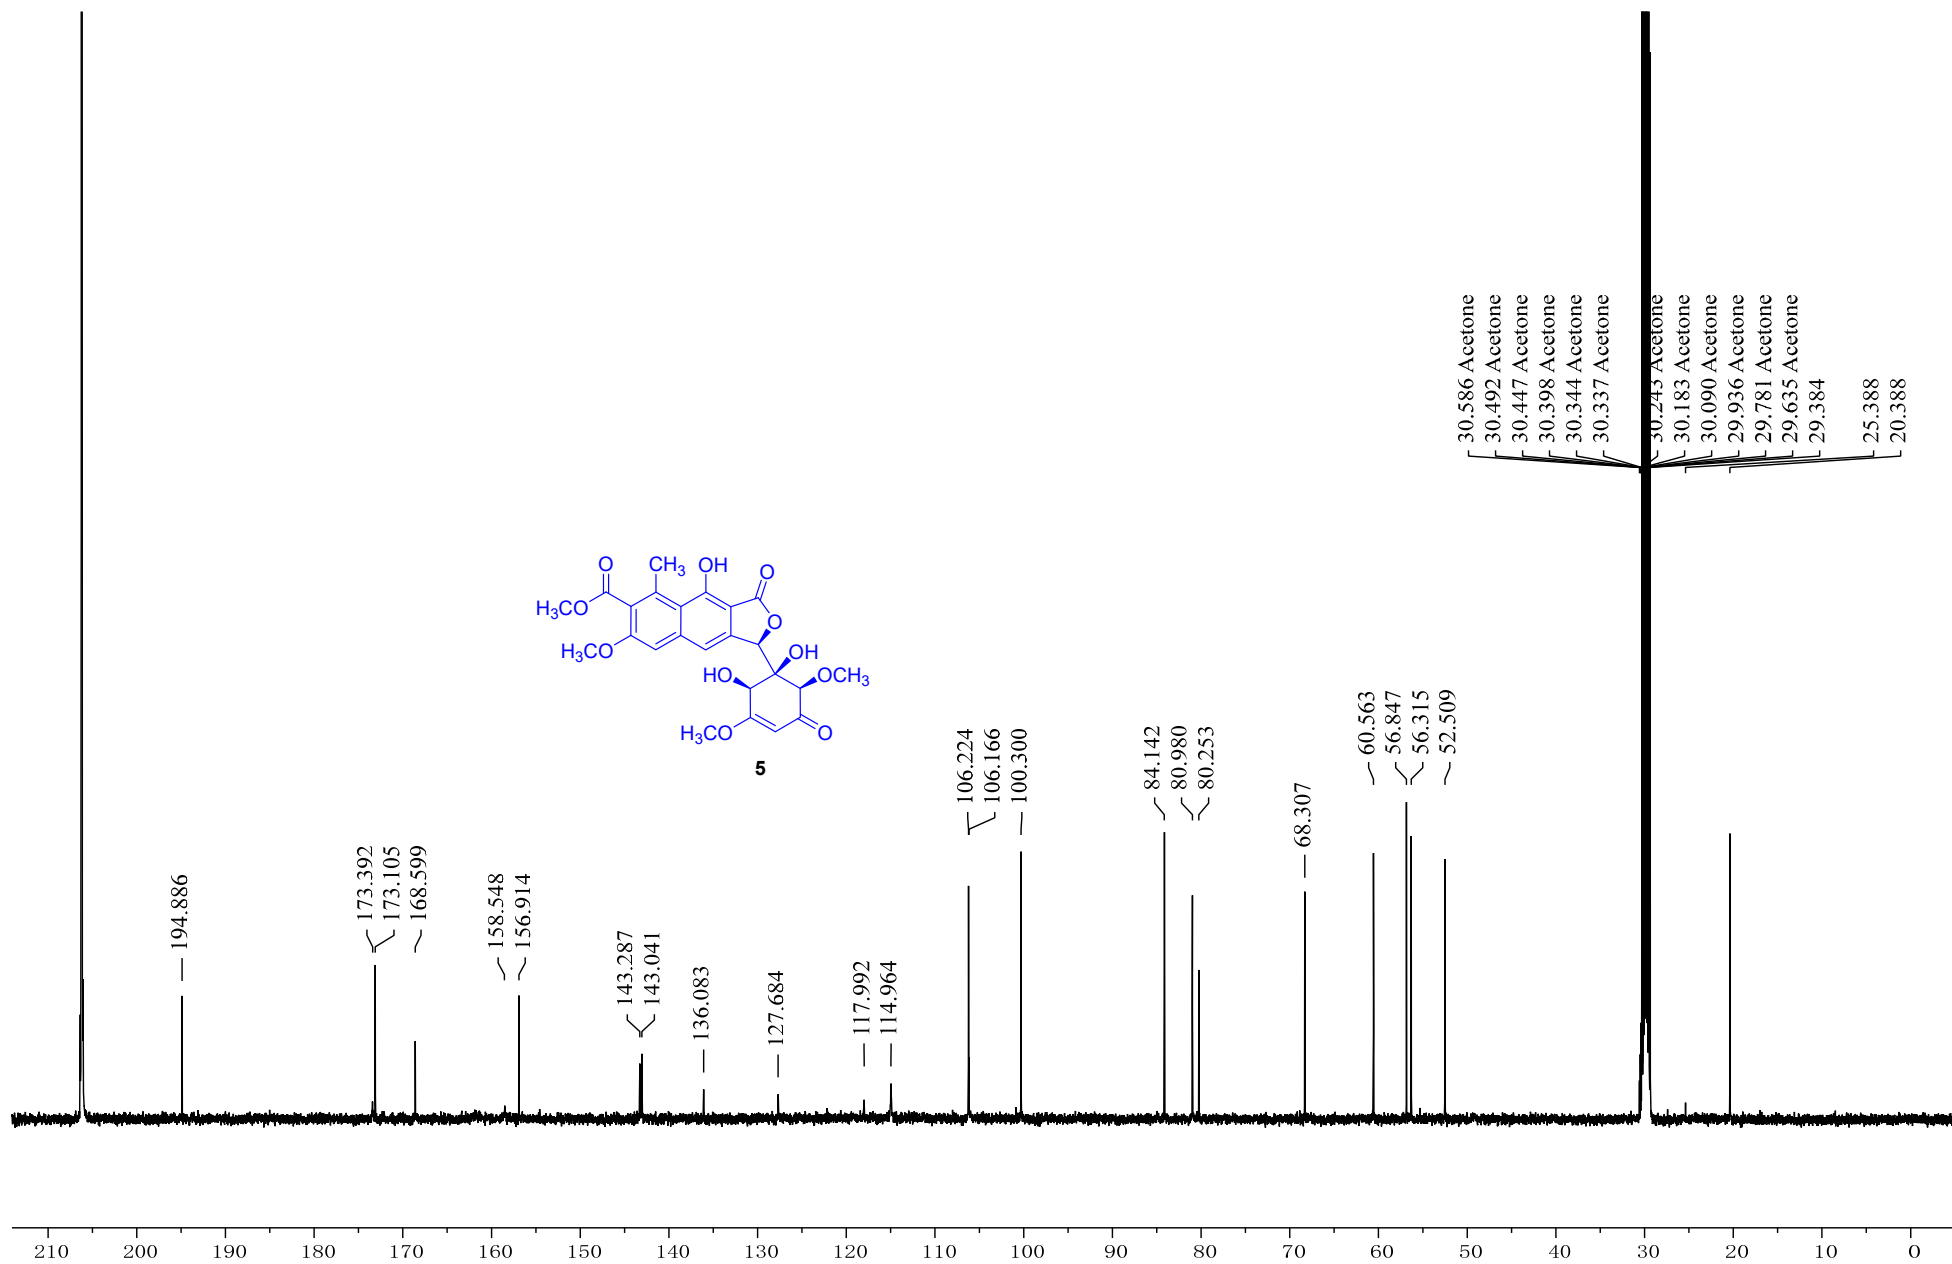

**Figure S38.** The  $^{13}\text{C}$  NMR spectrum of saccharothrixone I (**5**) in acetone- $d_6$  (125 MHz).

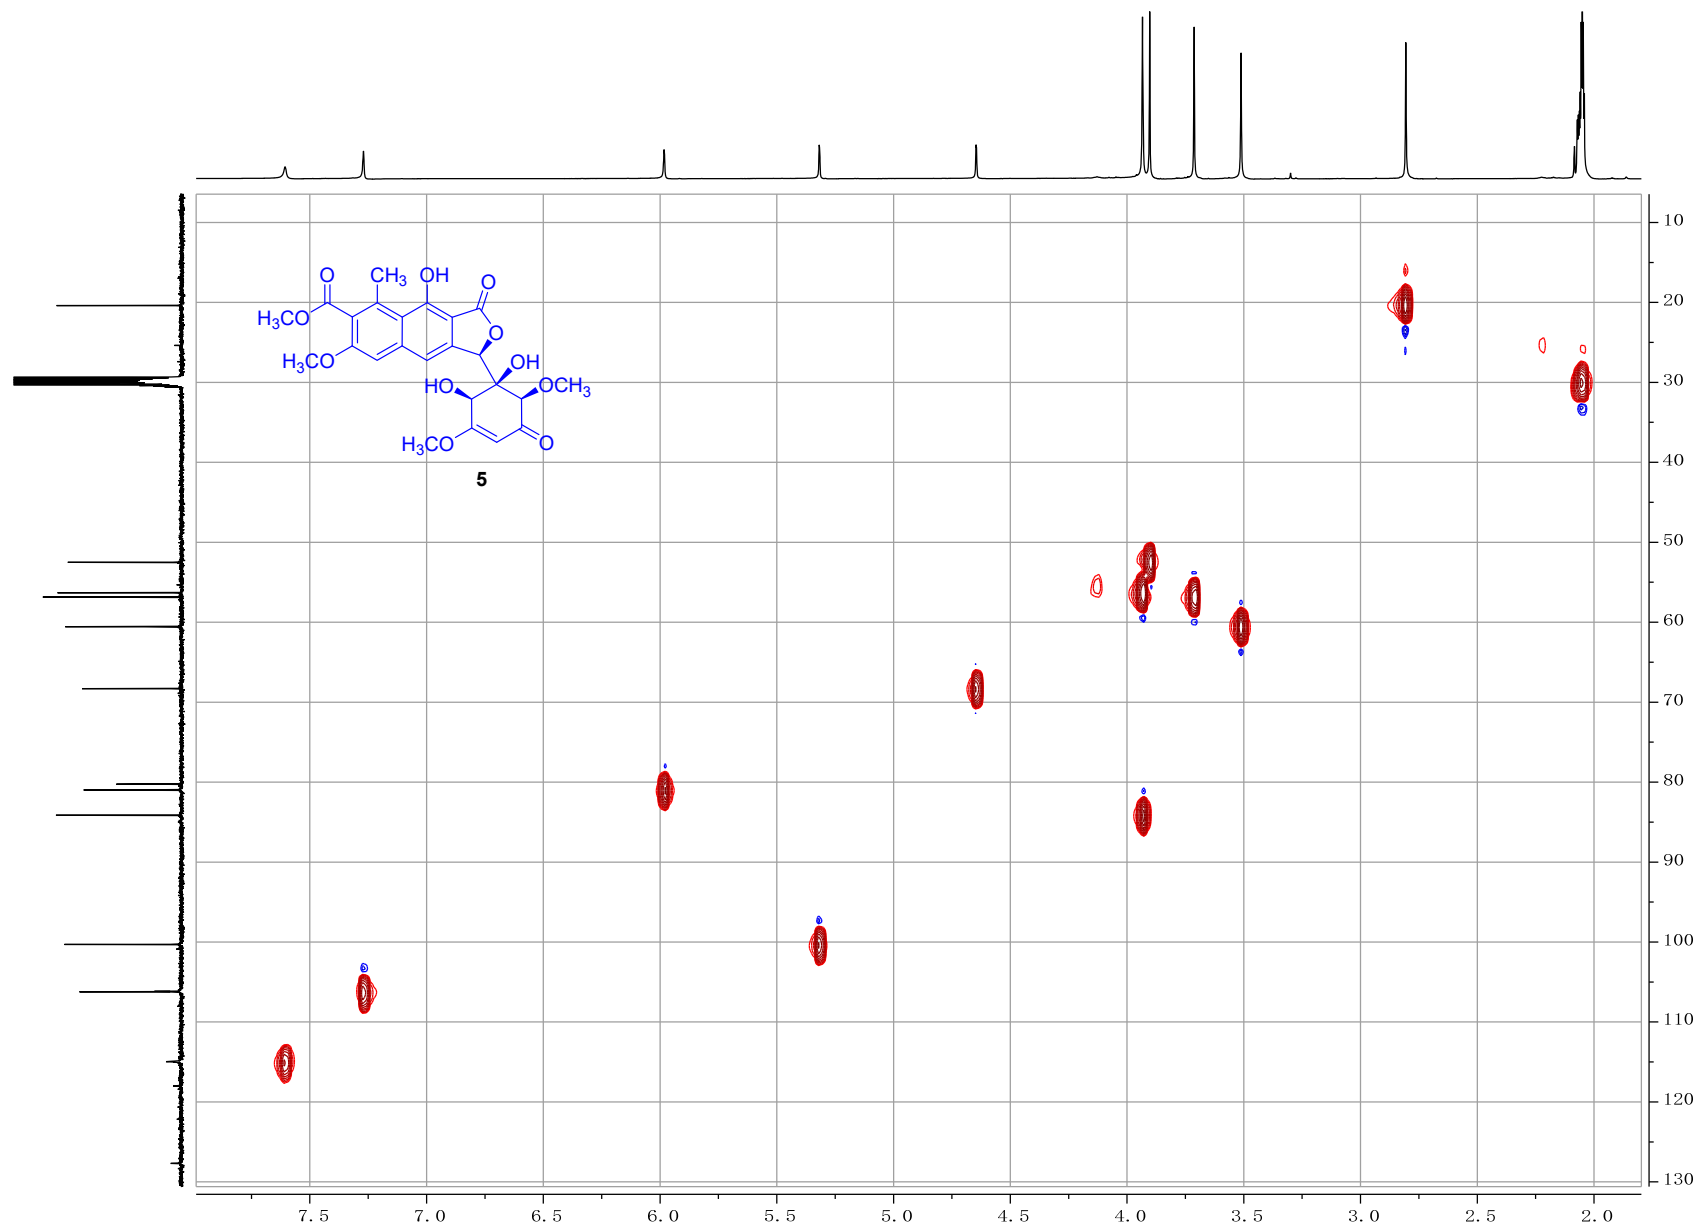

**Figure S39.** The HSQC spectrum of saccharothrixone I (**5**) in acetone- $d_6$  (500 MHz).

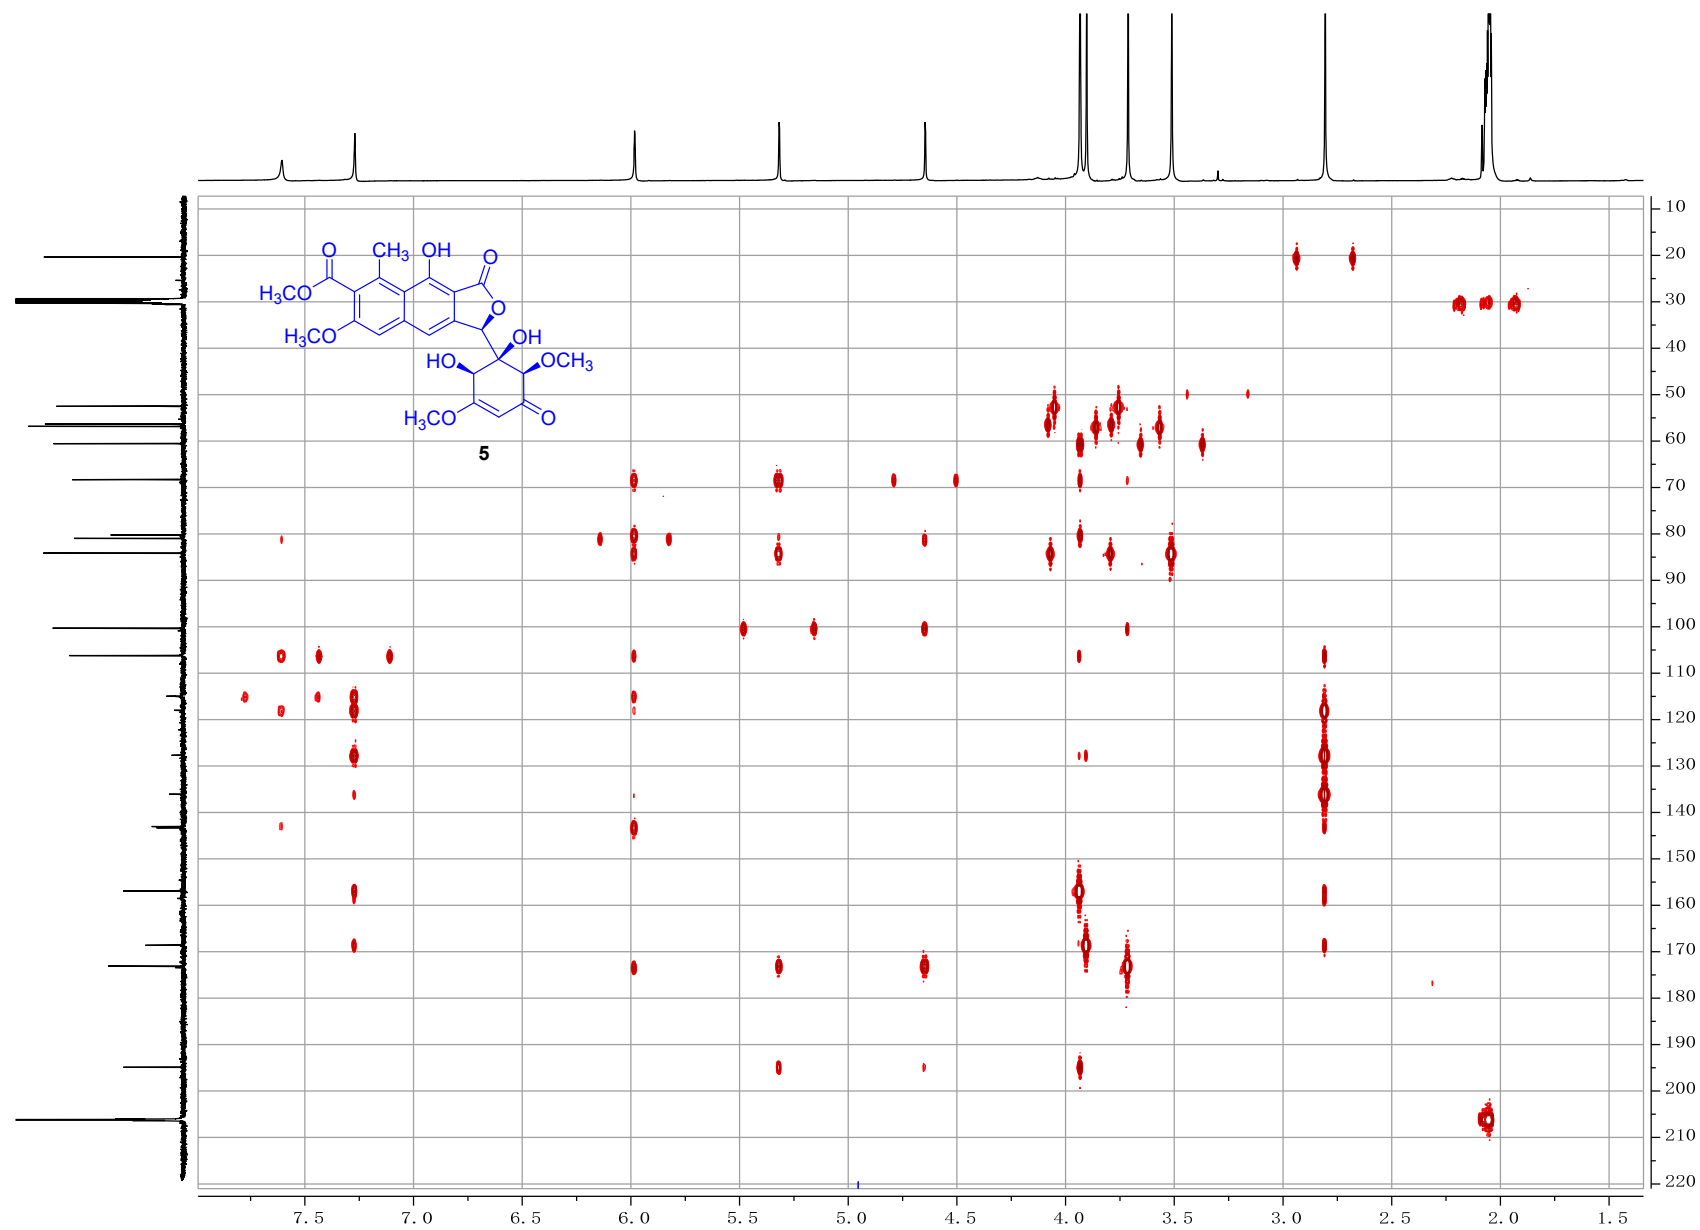

**Figure S40.** The HMBC spectrum of saccharothrixone I (**5**) in acetone- $d_6$  (500 MHz).

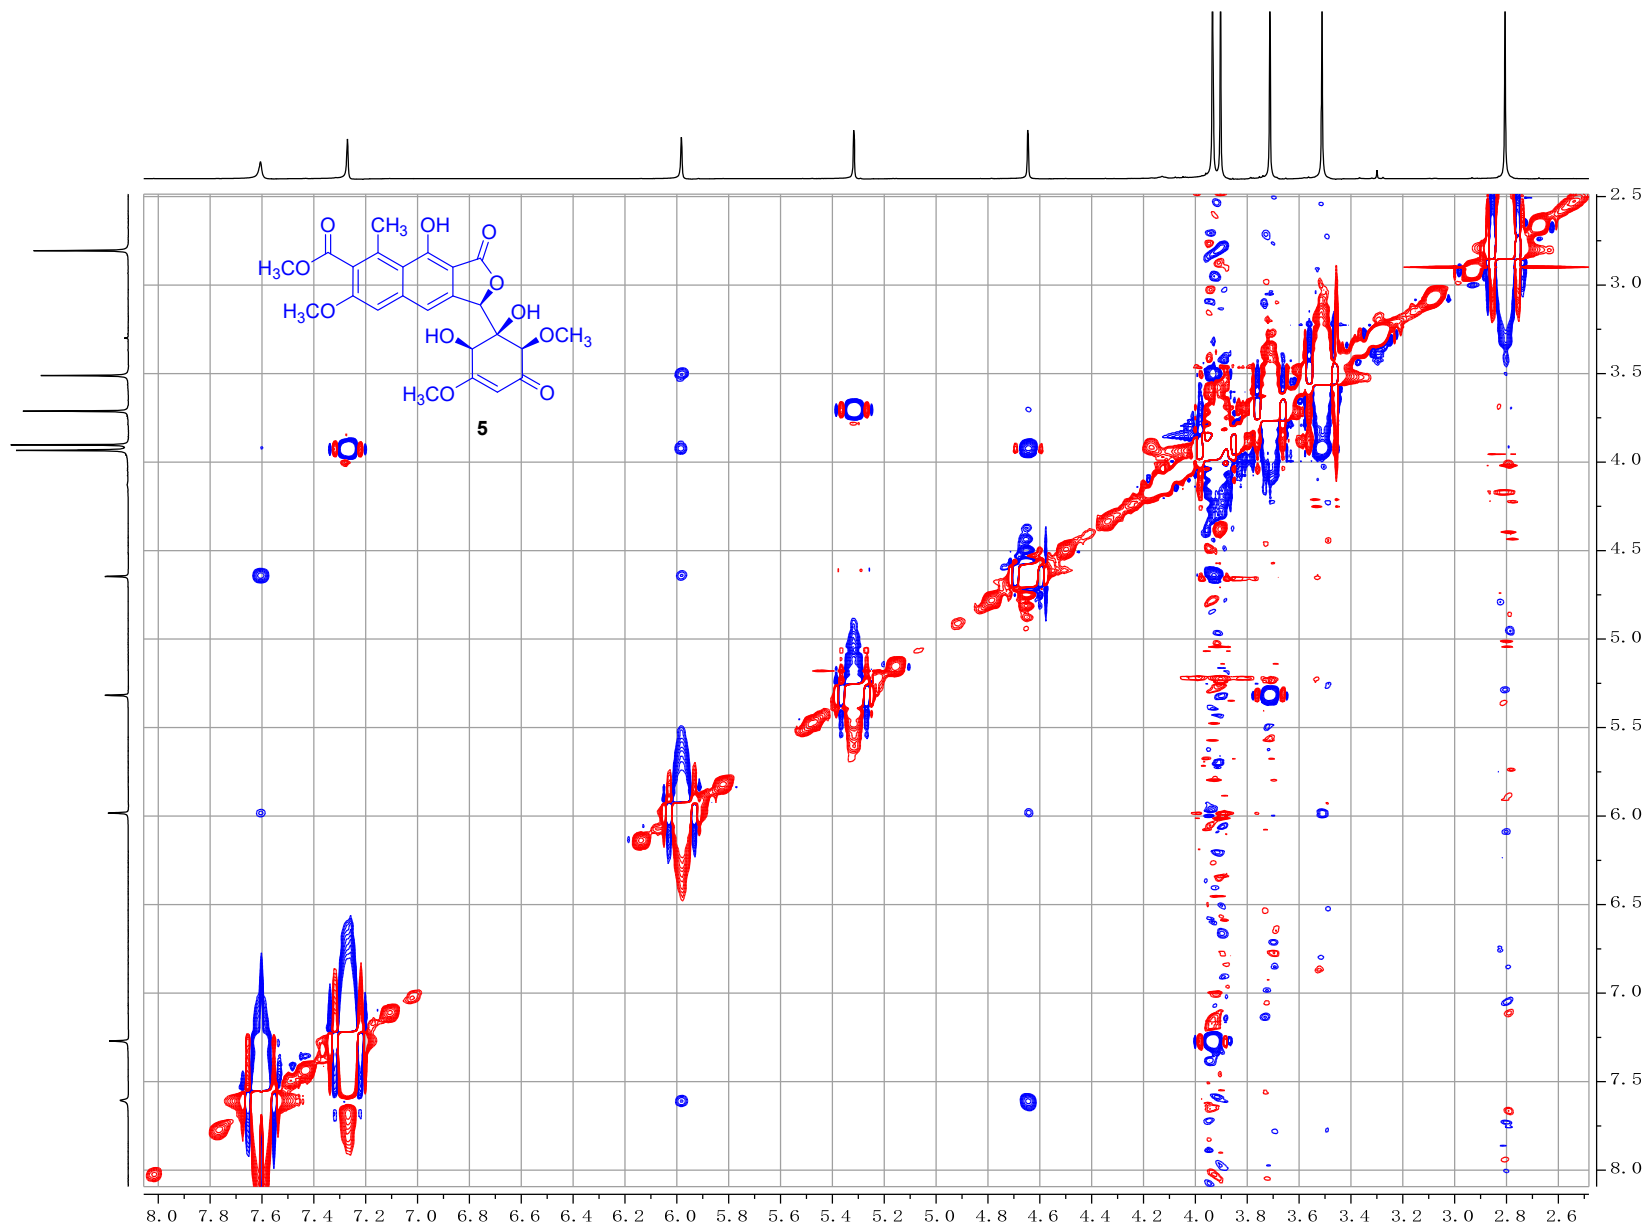

**Figure S41.** The ROESY spectrum of saccharothrixone I (**5**) in acetone- $d_6$  (600 MHz).



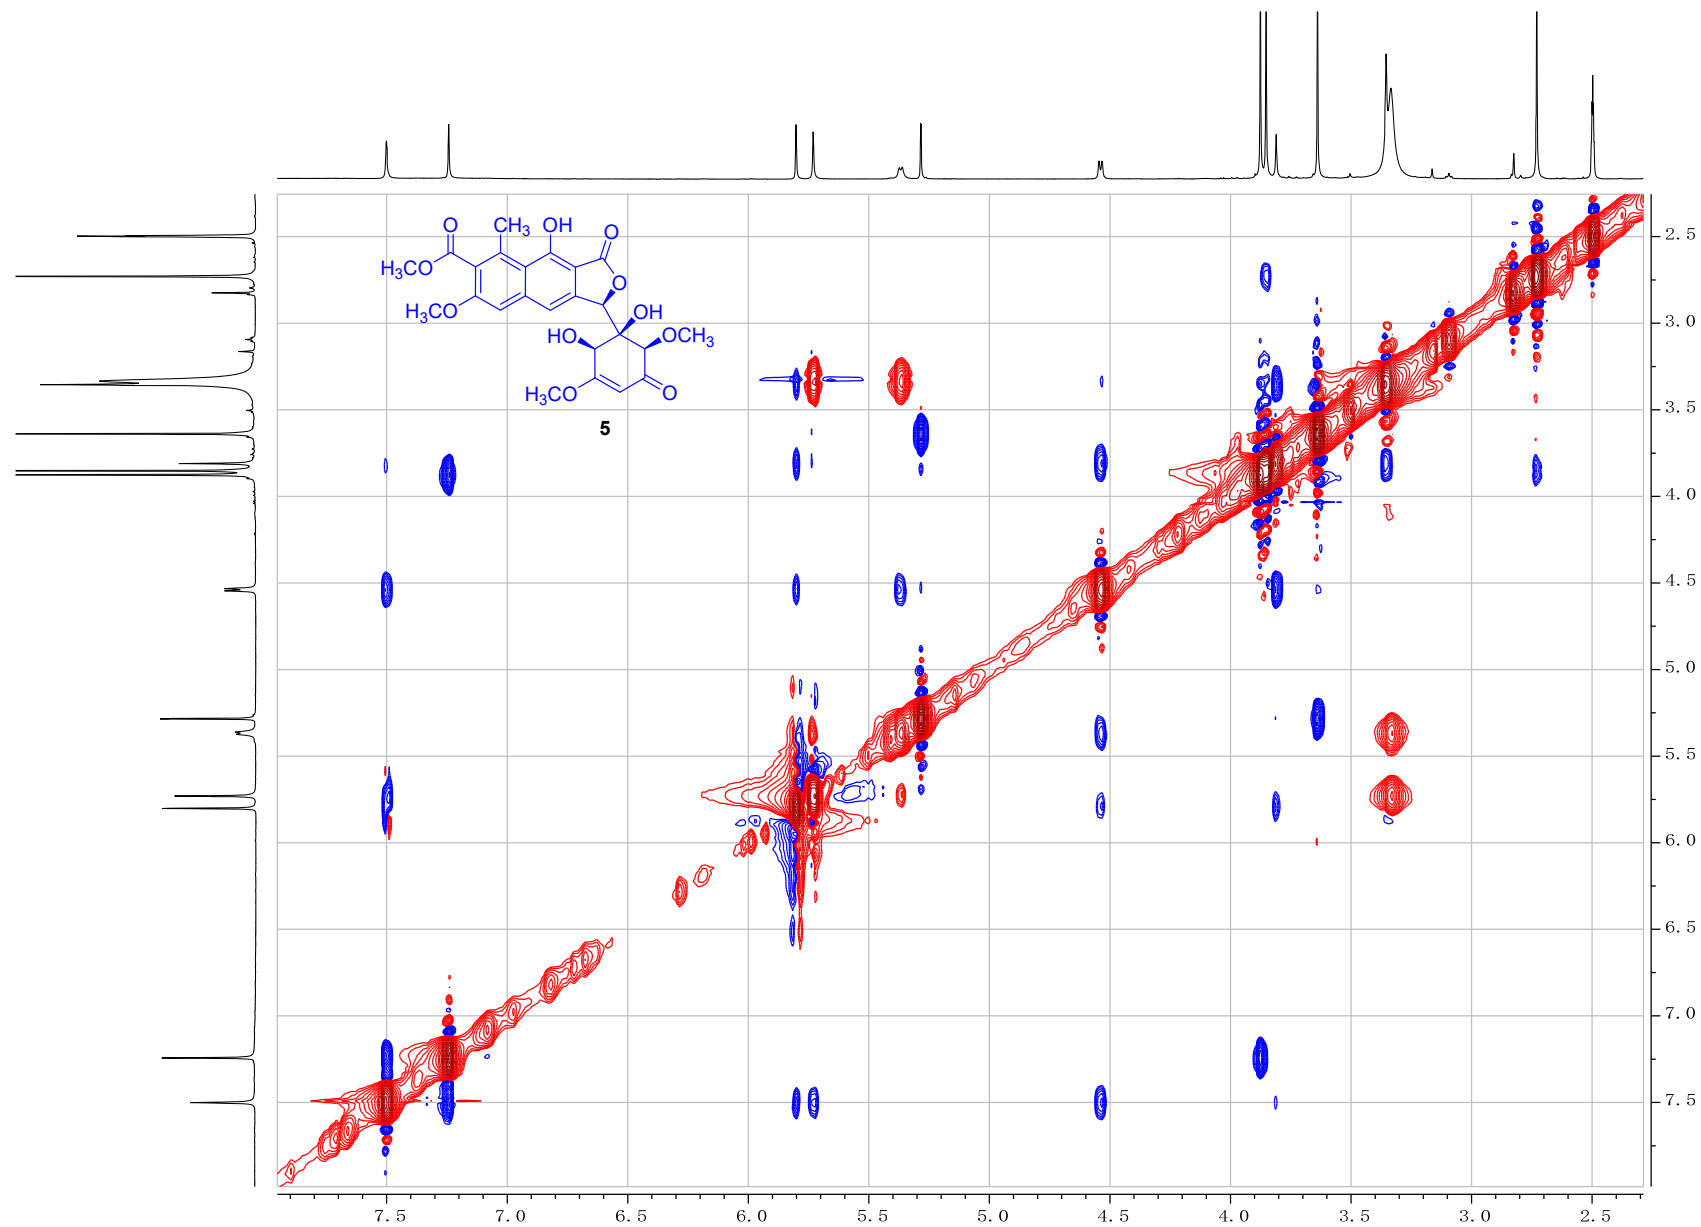

**Figure S42.** The ROESY spectrum of saccharothrixone I (**5**) in DMSO-*d*<sub>6</sub> (600 MHz).

MARINE-20-16 #35 RT: 1.17 AV: 1 NL: 7.73E4

T: FTMS + c ESI Full ms [450.00-550.00]

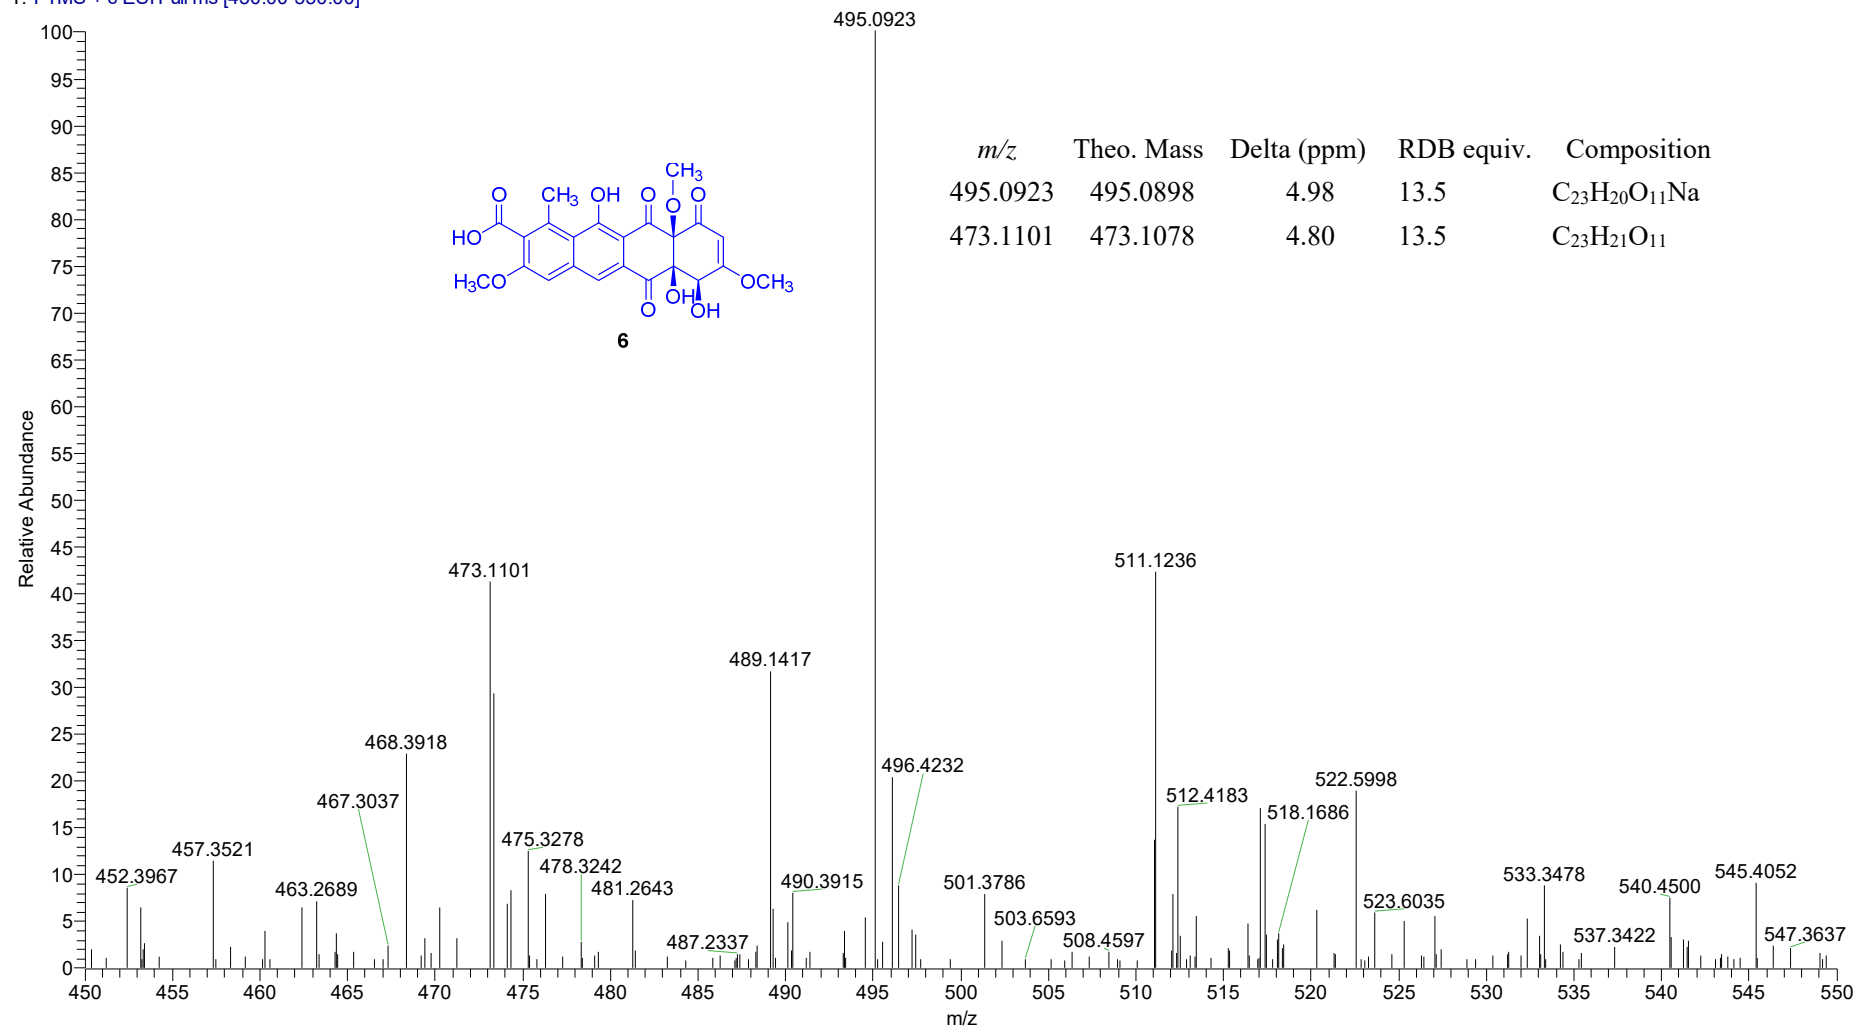

**Figure S43.** The (+)-HR ESIMS spectrum of 13-de-*O*-methyltetracenomycin X (**6**).

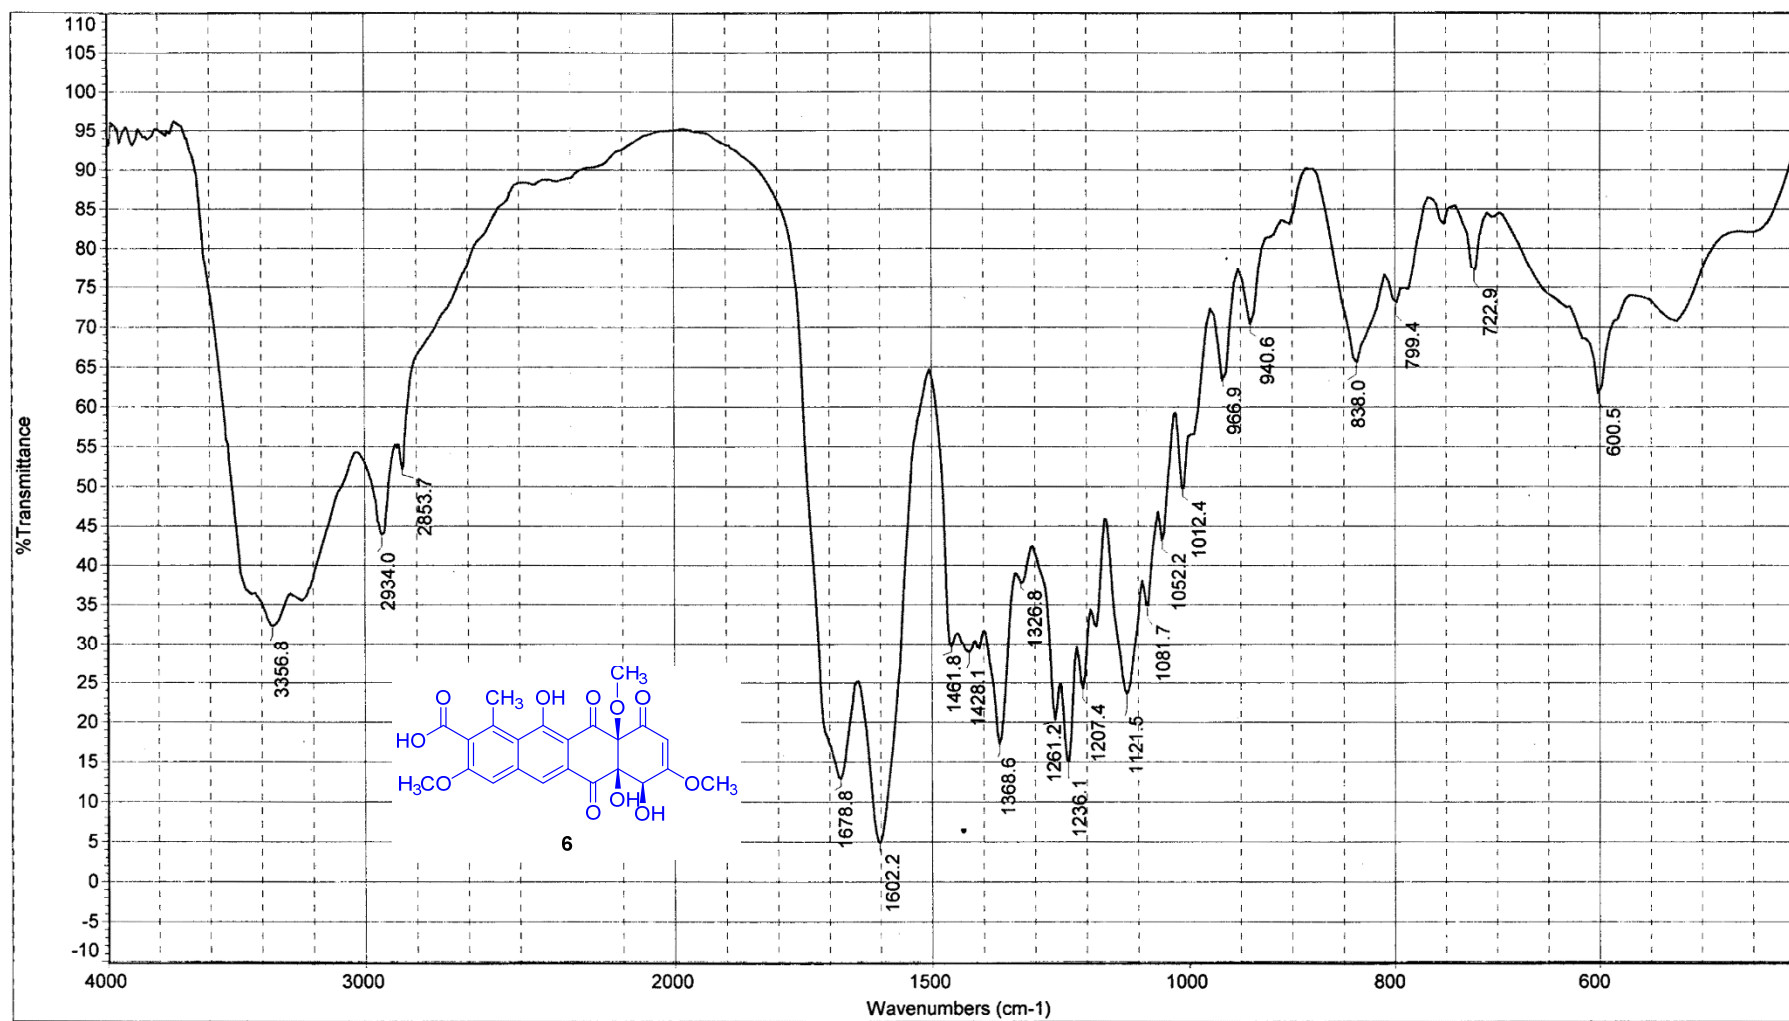

Figure S44. The IR spectrum of 13-de-O-methyltetracenomycin X (6).



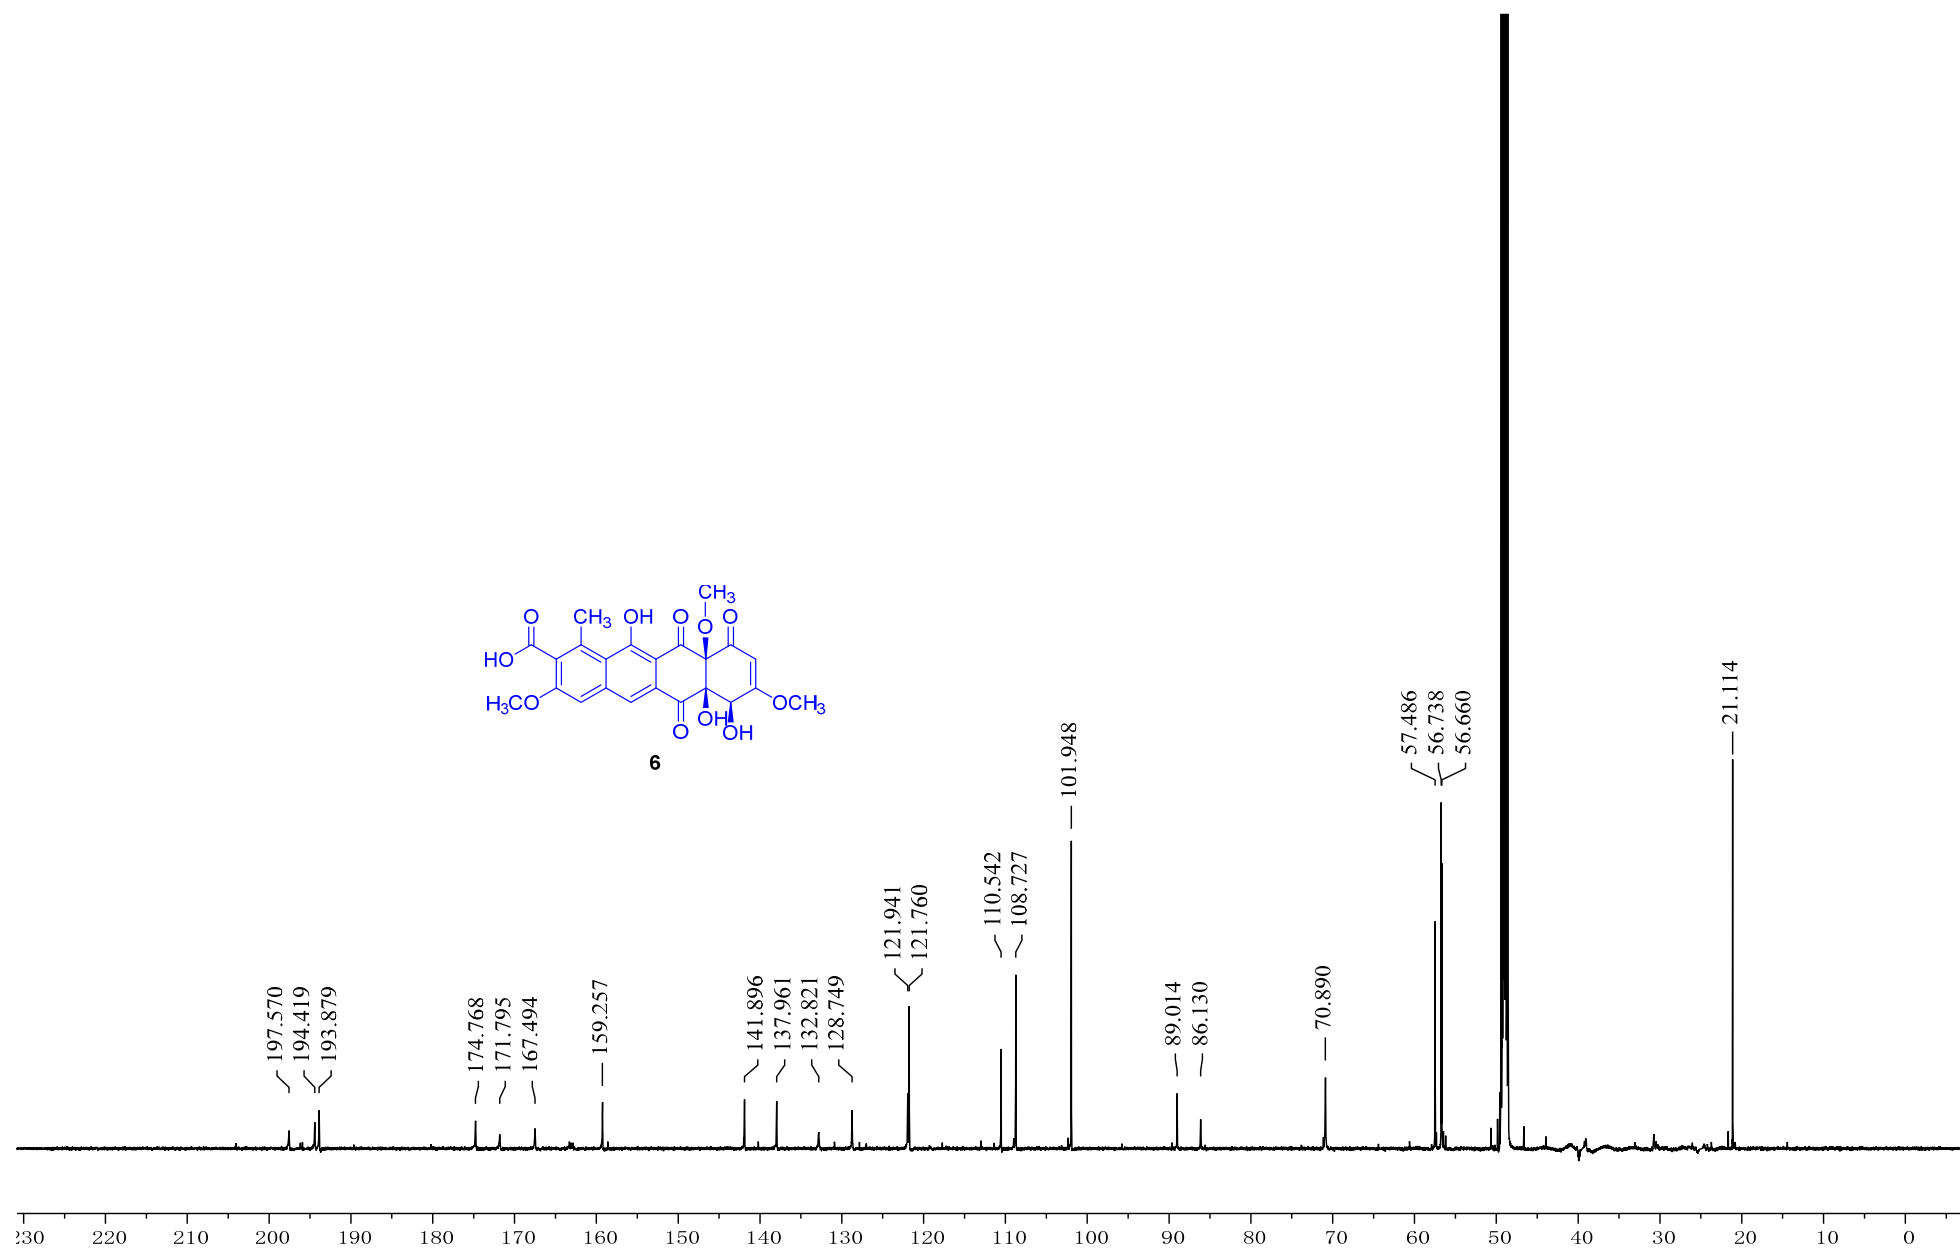

**Figure S46.** The  $^{13}\text{C}$  NMR spectrum of 13-de-O-methyltetracenomycin X (**6**) in  $\text{CD}_3\text{OD}$  (150 MHz).

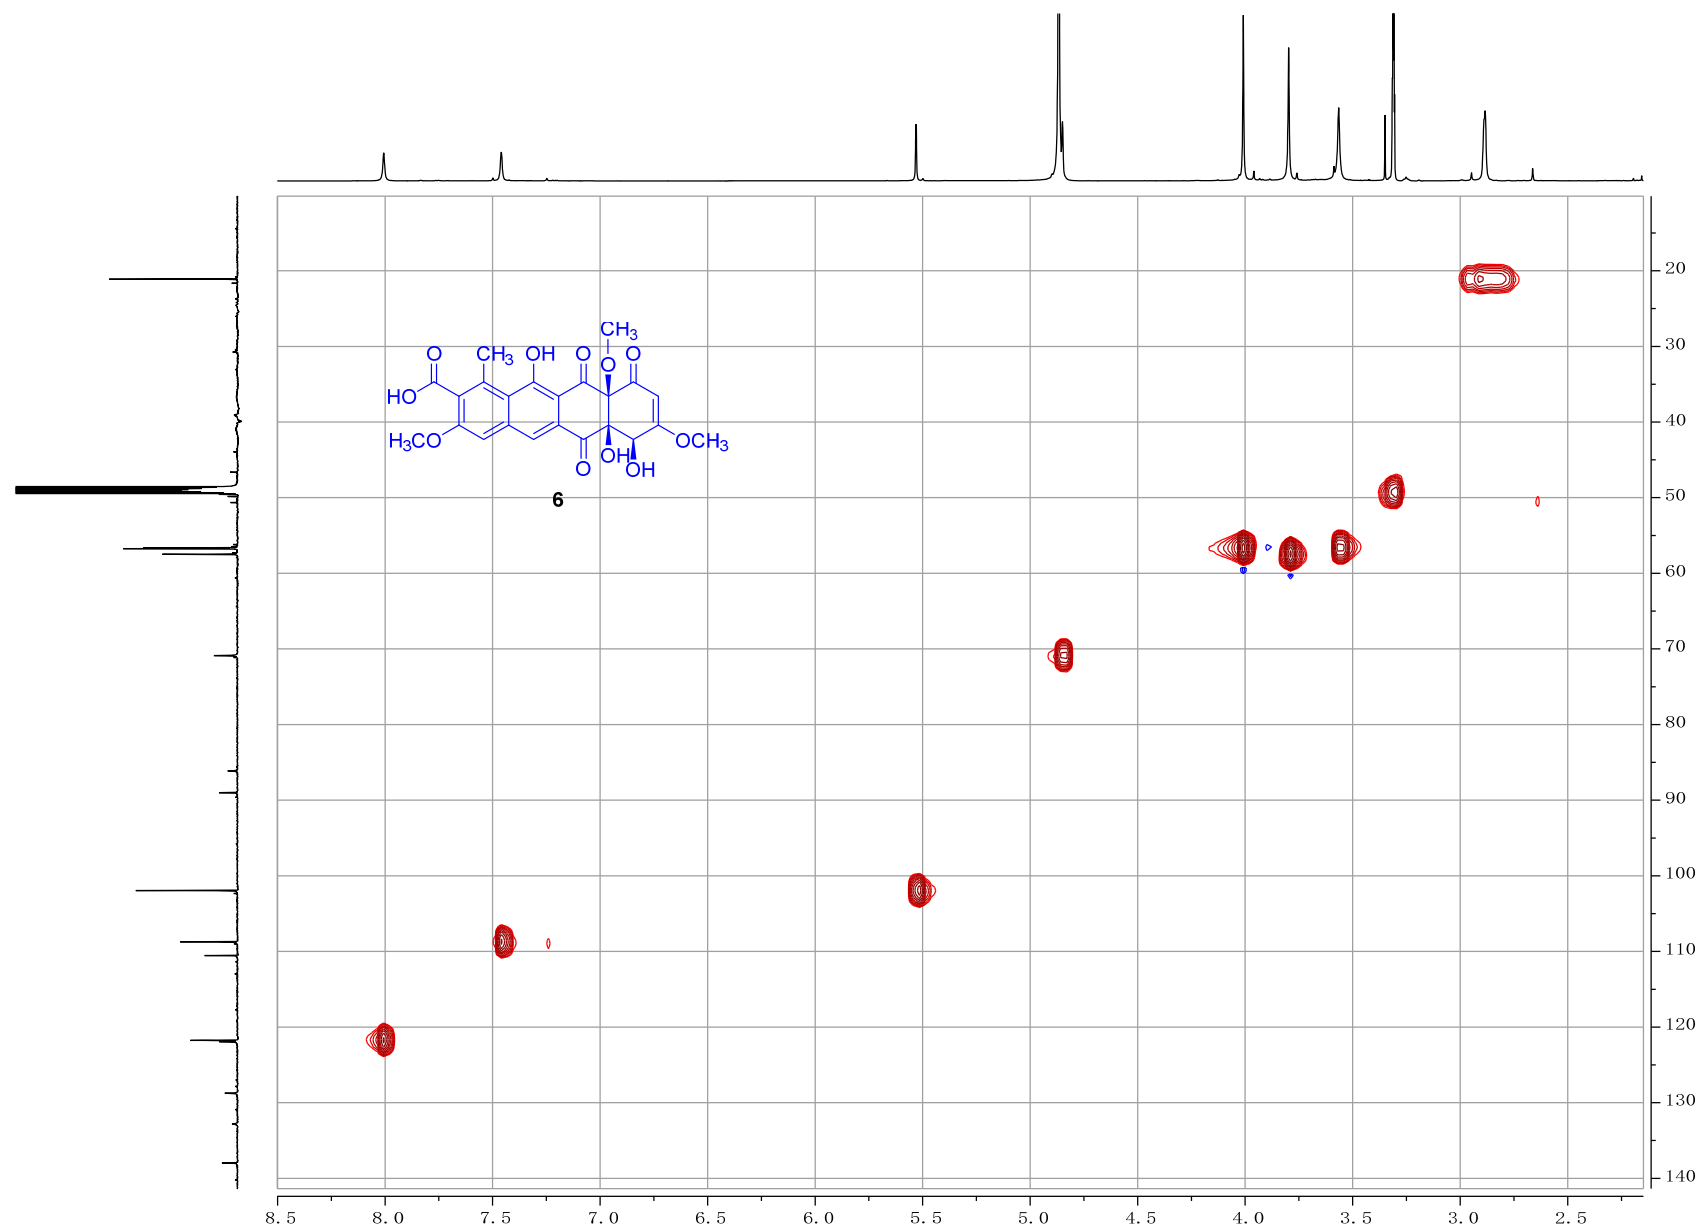

**Figure S47.** The HSQC spectrum of 13-de-*O*-methyltetracenomycin X (**6**) in CD<sub>3</sub>OD (600 MHz).

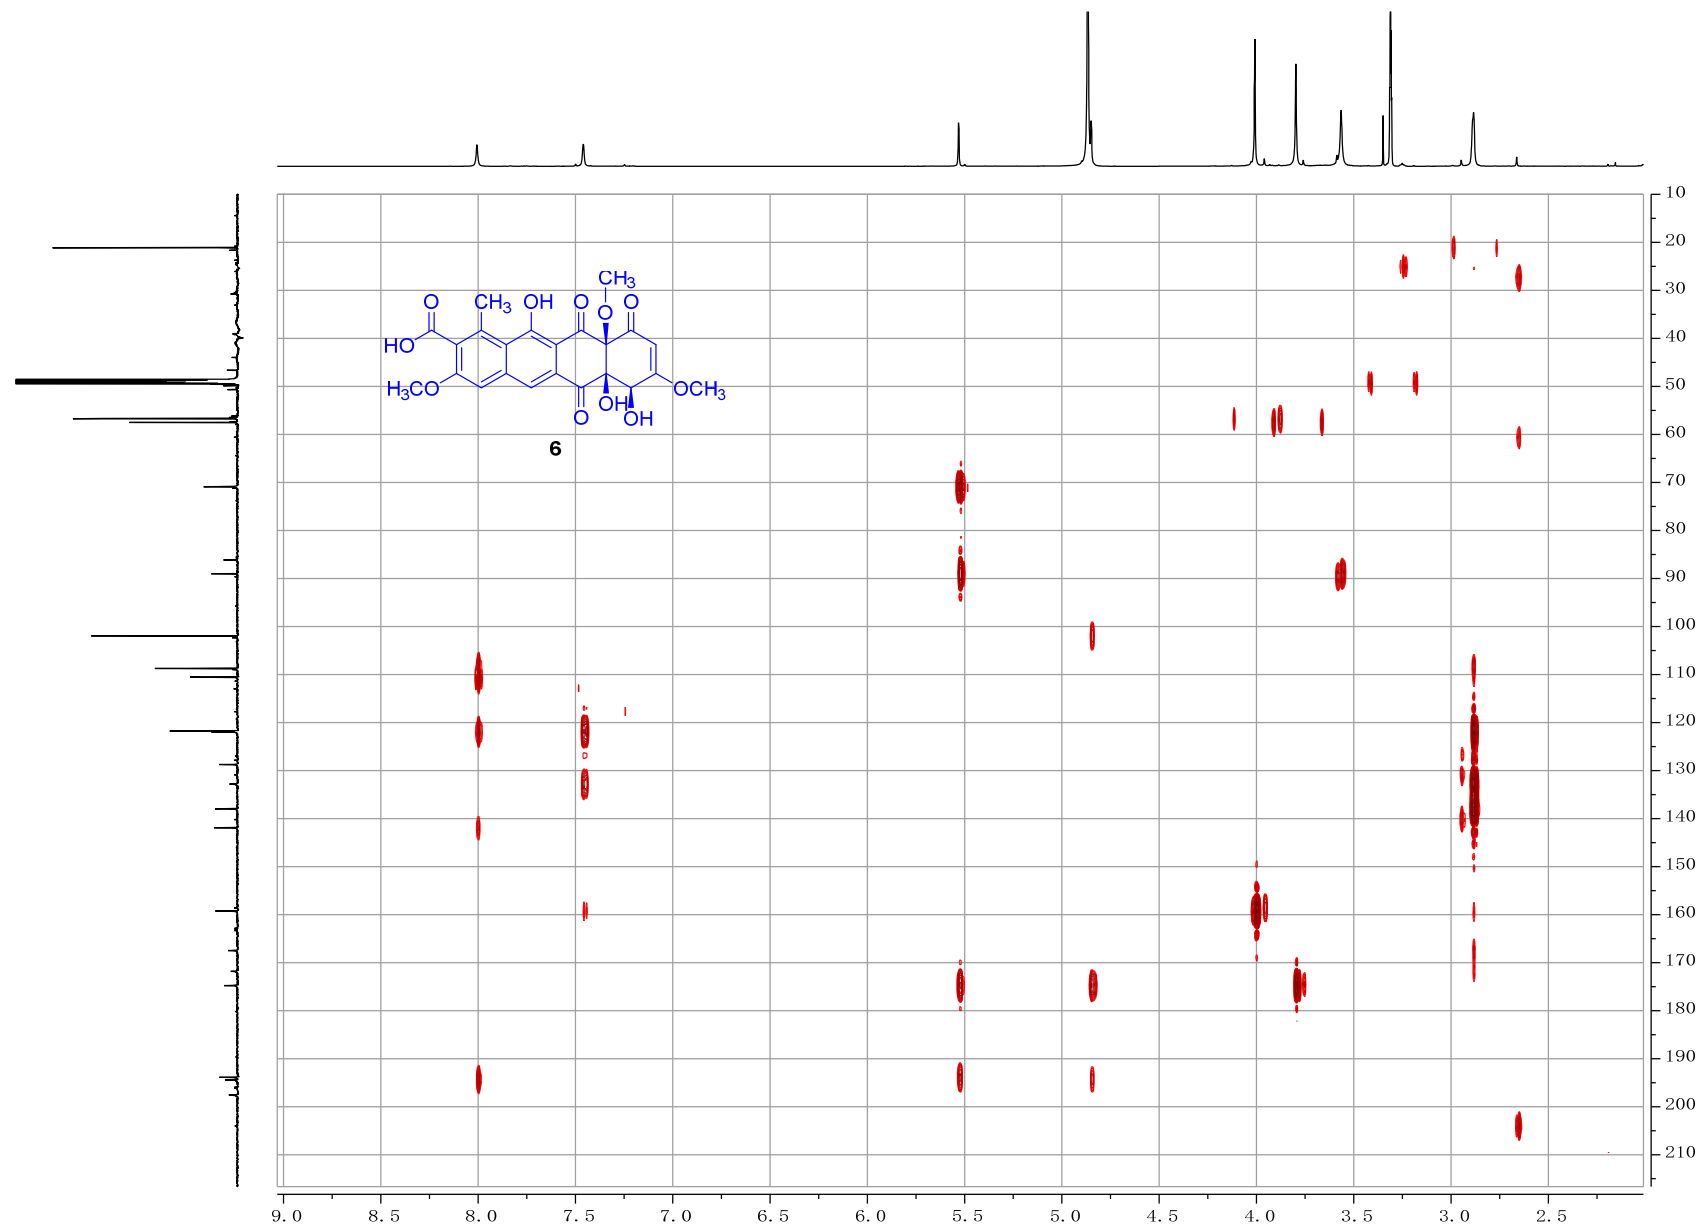

**Figure S48.** The HMBC spectrum of 13-de-*O*-methyltetracenomycin X (**6**) in CD<sub>3</sub>OD (600 MHz).

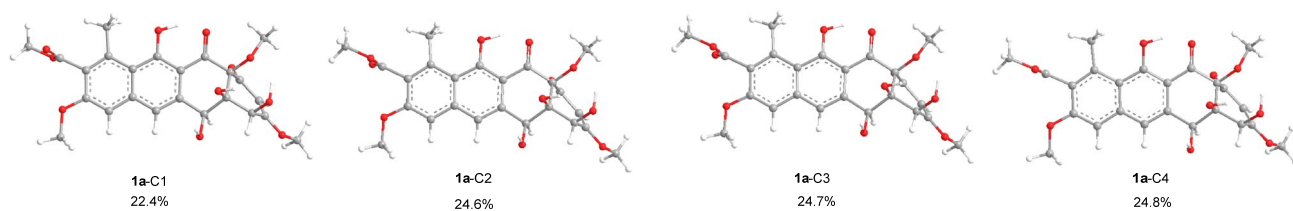

**Figure S49.** Optimized conformers ( $\geq 1\%$ ) of (4*S*,4*aR*,5*S*,12*aR*)-**1a** at the B3LYP/6-311+G(d,p) level with PCM model in MeOH.

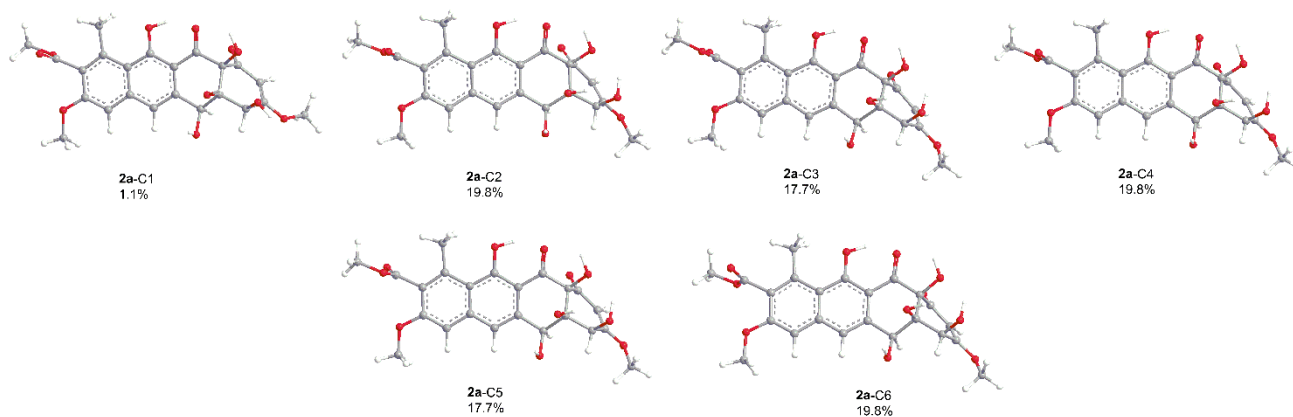

**Figure S50.** Optimized conformers ( $\geq 1\%$ ) of (4*S*,4*aR*,5*S*,12*aR*)-**2a** at the B3LYP/6-311+G(d,p) level with PCM model in MeOH.

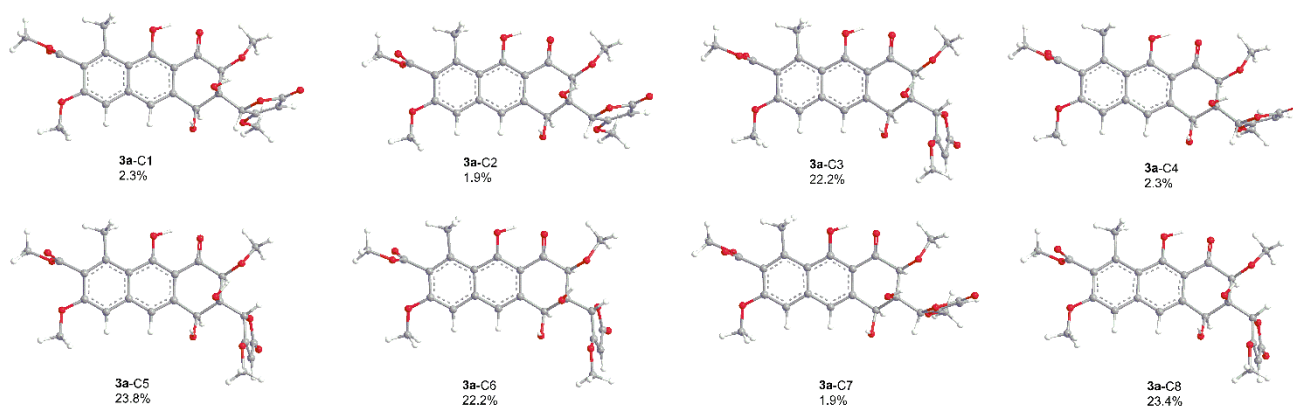

**Figure S51.** Optimized conformers ( $\geq 1\%$ ) of (4*S*,4*aR*,5*S*,12*aS*)-**3a** at the B3LYP/6-311+G(d,p) level with PCM model in MeOH.

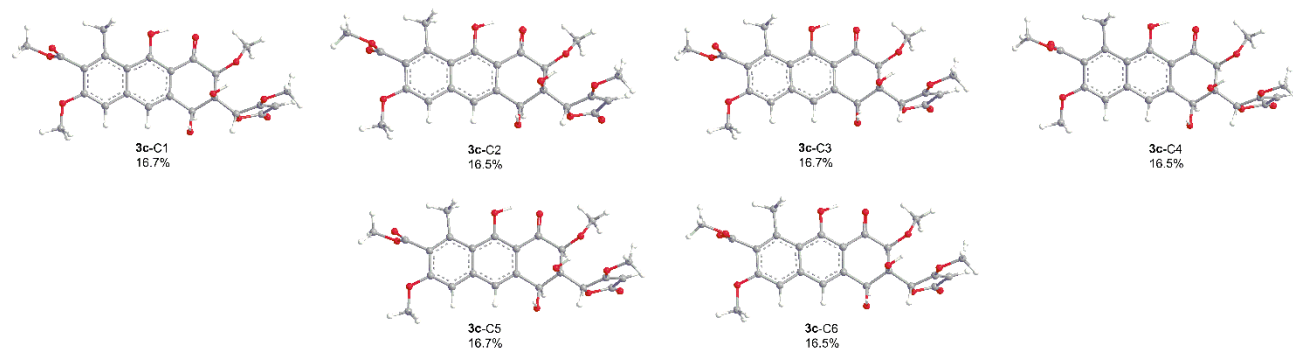

**Figure S52.** Optimized conformers ( $\geq 1\%$ ) of (4*R*,4*aR*,5*S*,12*aS*)-**3c** at the B3LYP/6-311+G(d,p) level with PCM model in MeOH.



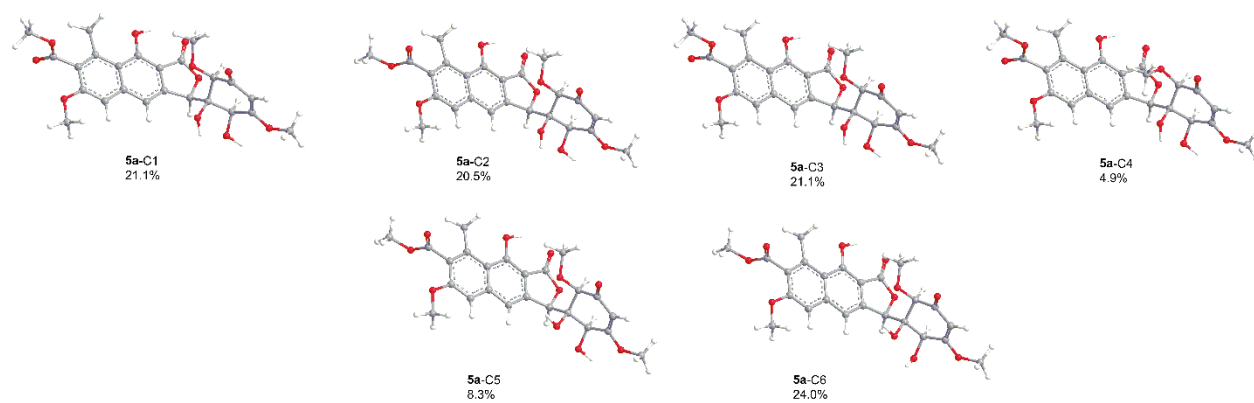

**Figure S53.** Optimized conformers ( $\geq 1\%$ ) of (4*S*,4*aR*,5*R*,12*aR*)-**5a** at the B3LYP/6-311+G (d,p) level with PCM model in MeOH.
